# Supplementary material for: Development of Natural Compound Molecular Fingerprint (NC-MFP) with the Dictionary of Natural Products (DNP) for natural product-based drug development
Source: J Cheminform. 2020 Jan 22;12:6. doi: 10.1186/s13321-020-0410-3 (PMC6977316; doi:10.1186/s13321-020-0410-3)
Supplement: Supplementary file 1 — Additional file 1. Chemical compounds of the Natural Compound Databases (NCDBs). [file 13321_2020_410_MOESM1_ESM.xlsx]

## Sheet: NCDBs_count_table
	No.	Natural Compound Database (NCDB)	No. of total compounds	No. of compounds with at least one ring sructure	No. of compounds without ring structure
	1	KNApSAcK	43,466 compounds	41,802 compounds	1,664 compounds
	2	InterBioScreen (IBScreen)	57,367 compounds	56,942 compounds	425 compounds
	3	Naturally occurring Plant based Anticancerous Compound-Activity-Target Database (NPACT)	1,384 compounds	1,335 compounds	49 compounds
	4	Specs	844 compounds	844 compounds	0 compounds
	5	Traditional Chinese Medicine (TCM)	35,180 compounds	33,902 compounds	1,278 compounds
	6	Natural Product Activity and Species Source Databases (NPASS DB)	26,434 compounds	24,815 compounds	1,623 compounds

## Sheet: Chemical compounds of NCDBs
Name	Canonical_Smiles	Molecular_Formula	Molecular_Weight	Class
(+)-(10S)-Bromo-beta-chamigrene	CC1=CCC2(CC1)C(=C)CCC(Br)C2(C)C	C15H23Br	283.247	KNApSAcK
(+)-(1S,10R)-1,10-Dimethylbicyclo[4.4.0]dec-6-en-3-one	CC1CCC=C2CCC(=O)CC12C	C12H18O	178.271	KNApSAcK
(+)-(2S',3'R)-3-Hydroxymarmesin (2'S,3'R)-3'-Hydroxymarmesin (+)-3'-Hydroxymarme	CC(C)(O)C1Oc2cc3OC(=O)C=Cc3cc2C1O	C14H14O5	262.258	KNApSAcK
(+)-(4-}2)-abeo-Kolavelool-3-oic acid	CC1CCC2(C)C(CC(=C2C)C(=O)O)C1(C)CCC(C)(O)C=C	C20H32O3	320.466	KNApSAcK
(+)-(6aS,11aS)-Medicarpin (+)-Medicarpin	COc1ccc2C3COc4cc(O)ccc4C3Oc2c1	C16H14O4	270.28	KNApSAcK
(+)-(9R,13S)-Dihydroxy-8(17),14-labdadiene	CC(O)(CCC1(O)C(=C)CCC2C(C)(C)CCCC12C)C=C	C20H34O2	306.483	KNApSAcK
(+)-(R)-(E)-3'-Hydroxyartemidin	CC(O)\C=C\C1=Cc2ccccc2C(=O)O1	C13H12O3	216.233	KNApSAcK
(+)-(S,R)-Epoxyartemidin	CCC1OC1C2=Cc3ccccc3C(=O)O2	C13H12O3	216.233	KNApSAcK
(+)-1,1'-Bislunatin	COc1cc(O)c2C(=O)c3c(O)cc(O)c(c3C(=O)c2c1)c4c(O)cc(O)c5C(=O)c6c(O)cc(OC)cc6C(=O)c45	C30H18O12	570.457	KNApSAcK
(+)-1,2-Dehydro-2'-nortelobine (+)-1',2'-Didehydro-2-nortelobine	COc1ccc2CC3=NCCc4cc5Oc6c(OC)cc7CCNC(Cc8ccc(Oc1c2)cc8)c7c6Oc5cc34	C34H30N2O5	546.612	KNApSAcK
(+)-1,2-Dehydrokohatamine	COc1ccc2CC3=NCCc4cc5Oc6c(OC)c(O)c7CCN(C)C(Cc8ccc(Oc1c2)cc8)c7c6Oc5cc34	C35H32N2O6	576.638	KNApSAcK
(+)-1,2-Dehydrokohatine	COc1c(O)c2CCN(C)C3Cc4ccc(Oc5cc(CC6=NCCc7cc8Oc1c(Oc8cc67)c23)ccc5O)cc4	C34H30N2O6	562.612	KNApSAcK
(+)-1,2-Dehydrotelobine 1',2'-Didehydrotelobine 1,2-Dehydrotelobine	COc1ccc2CC3=NCCc4cc5Oc6c(OC)cc7CCN(C)C(Cc8ccc(Oc1c2)cc8)c7c6Oc5cc34	C35H32N2O5	560.639	KNApSAcK
(+)-1,2-Dimethoxy-3-hydroxy-9,10-methylenedioxynoraporphine	COc1c(O)c2CCNC3Cc4cc5OCOc5cc4c(c1OC)c23	C19H19NO5	341.358	KNApSAcK
(+)-1,5-Cyclo-5,8,9,10-tetrahydroerogorgiaene	CC(CCC=C(C)C)C1CCC2(C)C3CC=C(C)C2C13	C20H32	272.468	KNApSAcK
(+)-1,5-Dimethyl-6,8-dioxabicyclo[3.2.1]octane (R)-(+)-Frontalin	CC12CCCC(C)(OC1)O2	C8H14O2	142.196	KNApSAcK
(+)-10,11-Dihydroxy-1,2-dimethoxynoraporphine	COc1cc2CCNC3Cc4ccc(O)c(O)c4c(c1OC)c23	C18H19NO4	313.348	KNApSAcK
(+)-10-Hydroxyisotrilobine	COc1ccc2CC3N(C)CCc4cc5Oc6c(OC)cc7CCN(C)C(Cc8ccc(Oc1c2O)cc8)c7c6Oc5cc34	C36H36N2O6	592.681	KNApSAcK
(+)-10-Methoxyvinorine	COc1ccc2N=C3C4CC5C6C(CC3(C6OC(=O)C)c2c1)N4C/C/5=C/C	C22H24N2O3	364.438	KNApSAcK
(+)-11-Hydroxyvittatine	OC1CC2N3CC(O)C2(C=C1)c4cc5OCOc5cc4C3	C16H17NO4	287.31	KNApSAcK
(+)-11alpha-Hydroxyerythravine	COc1cc2C(O)CN3CC=C4C=CC(O)CC34c2cc1OC	C18H21NO4	315.364	KNApSAcK
(+)-12-Dihydrousararotenoid A	OC1c2ccc3OCOc3c2OC4COc5cc6OCOc6cc5C14O	C18H14O8	358.299	KNApSAcK
(+)-12-Hydroxy-alpha-cyperone (4aS-cis)-4,4a,5,6,7,8-Hexahydro-7-[1-(hydroxymeth	CC1=C2CC(CCC2(C)CCC1=O)C(=C)CO	C15H22O2	234.334	KNApSAcK
(+)-12-Hydroxymauiensine	C\C=C/1\CN2C3CC45C(O)C3C1CC2C4N(C)c6c(O)cccc56	C20H24N2O2	324.417	KNApSAcK
(+)-12-methoxyaffinisine 12-methoxyaffinisine 12-Methoxyaffinisine	COc1cccc2c3CC4C(CO)C5CC(N4C/C/5=C/C)c3n(C)c12	C21H26N2O2	338.443	KNApSAcK
(+)-12-O-Methyltricordatine	COc1ccc2CC3N(C)CCc4cc5Oc6c(O)cc7CCN(C)C(Cc8ccc(Oc1c2)cc8)c7c6Oc5cc34	C35H34N2O5	562.655	KNApSAcK
(+)-12a-Epimillettosin (6aS,12aS)-12a-Hydroxy-2,3-methylenedioxy-6',6'-dimethoxy	CC1(C)Oc2ccc3C(=O)C4(O)C(COc5cc6OCOc6cc45)Oc3c2C=C1	C22H18O7	394.374	KNApSAcK
(+)-12a-Hydroxyerythynone	COc1cc2OCC3Oc4c5C=CC(C)(C)Oc5c(OC)cc4C(=O)C3(O)c2cc1OC	C24H24O8	440.443	KNApSAcK
(+)-12alpha,28-Dihydroxy-3alpha-(3'-hydroxy-3'-methylglutaryloxy)-24-methyllanos	CC(CCC(=C)C(C)C(=O)O)C1CCC2(C)C3=C(CC(O)C12C)C4(C)CCC(OC(=O)CC(C)(O)CC(=O)O)C(C)(CO)C4CC3	C37H58O9	646.851	KNApSAcK
(+)-13-epi-2alpha-Hydroxykolavelool	CC1CCC2(C)C(CC(O)C=C2C)C1(C)CCC(C)(O)C=C	C20H34O2	306.483	KNApSAcK
(+)-14,15-Dehydro-16-epivincamine 14,15-Dehydro-16-epivincamine 14,15-Didehydro-	CCC12CC(O)(C(=O)OC)n3c4C1N(CCc4c5ccccc35)CC=C2	C21H24N2O3	352.427	KNApSAcK
(+)-14-Epichelidonine	CN1Cc2c3OCOc3ccc2C4C(O)Cc5cc6OCOc6cc5C14	C20H19NO5	353.369	KNApSAcK
(+)-16-Hydroxy-9-O-demethylgalwesine	COC1C2OC(=O)c3cc(O)c(OC)cc3C2(O)C4N(C)CCC45OC15	C18H21NO7	363.362	KNApSAcK
(+)-16-Hydroxygalwesine	COC1C2OC(=O)c3cc(OC)c(OC)cc3C2(O)C4N(C)CCC45OC15	C19H23NO7	377.388	KNApSAcK
(+)-17-O-Acetylnortetraphyllicine	C\C=C/1\CN2C3CC45C(Nc6ccccc46)C2CC1C3C5OC(=O)C	C21H24N2O2	336.427	KNApSAcK
(+)-17-Oxocycloprotobuxine	CNC1CCC23CC24CCC5(C)C(=O)CCC5(C)C4CCC3C1(C)C	C23H37NO	343.546	KNApSAcK
(+)-19-Hydroxy-20-epi-pandoline	COC(=O)C1=C2Nc3ccccc3C24CCN5CC(O)(CC(C1)C45)C(C)O	C21H26N2O4	370.442	KNApSAcK
(+)-19-Oxoeburnamine	CC(=O)C12CCCN3CCc4c(C13)n(C(O)C2)c5ccccc45	C19H22N2O2	310.39	KNApSAcK
(+)-2'-Norcocsoline N-Demethylcocsoline	COc1cc2CCNC3Cc4ccc(Oc5cc(CC6NCCc7cc8Oc1c(Oc8cc67)c23)ccc5O)cc4	C33H30N2O5	534.602	KNApSAcK
(+)-2'-Norcocsuline (+)-O12'-Demethyltrilobine 12'-O-Nortrilobine	COc1cc2CCNC3Cc4ccc(Oc5cc(CC6N(C)CCc7cc8Oc1c(Oc8cc67)c23)ccc5O)cc4	C34H32N2O5	548.628	KNApSAcK
(+)-2,3-Dihydro-6-methyl-3-methylene-2-benzofuranol	Cc1ccc2C(=C)C(O)Oc2c1	C10H10O2	162.185	KNApSAcK
(+)-2,3-Dihydro-9-hydroxy-2[1-(6-sinapinoyl)beta-D-glucosyloxy-1-methylethyl]-7H	COc1cc(\C=C\C(=O)OCC2OC(OC(C)(C)C3Cc4cc5C=CC(=O)Oc5c(O)c4O3)C(O)C(O)C2O)cc(OC)c1O	C31H34O14	630.593	KNApSAcK
(+)-2,5-Diepi-beta-cedrene	CC1CCC2C(C)(C)C3CC12CCC3=C	C15H24	204.351	KNApSAcK
(+)-2-(Bromomethyl)-2,3,4,5-tetrahydro-5,8,10-trimethyl-2,5-methano-1-benzoxepin	CC1C2(CBr)CCC1(C)c3ccc(C)cc3O2	C15H19BrO	295.215	KNApSAcK
(+)-2-Epialtholactone	OC1C2OC(=O)C=CC2OC1c3ccccc3	C13H12O4	232.232	KNApSAcK
(+)-2-Norberbamine 2-Norberbamine 2-Demethylberbamine	COc1cc2CCN(C)C3Cc4ccc(Oc5cc(CC6NCCc7c(OC)c(OC)c(Oc1cc23)cc67)ccc5O)cc4	C36H38N2O6	594.697	KNApSAcK
(+)-2-Norcepharanthine 2-Norcepharanthine	COc1ccc2CC3N(C)CCc4cc(OC)c(Oc5c6OCOc6cc7CCNC(Cc8ccc(Oc1c2)cc8)c57)cc34	C36H36N2O6	592.681	KNApSAcK
(+)-2-Norisotetrandrine 2-Norisotetrandrine	COc1ccc2CC3NCCc4c(OC)c(OC)c(Oc5cc6C(Cc7ccc(Oc1c2)cc7)N(C)CCc6cc5OC)cc34	C37H40N2O6	608.723	KNApSAcK
(+)-2-Northalrugosine Dihydrotiliafunimine	COc1ccc2CC3NCCc4cc(OC)c(O)c(Oc5cc6C(Cc7ccc(Oc1c2)cc7)N(C)CCc6cc5OC)c34	C36H38N2O6	594.697	KNApSAcK
(+)-20-Hydroxyelemajurinelloide	C\C=C(\CO)/C(=O)OC1CC(CO)(C=C)C(C2OC(=O)C(=C)C12)C(=C)CO	C20H26O7	378.416	KNApSAcK
(+)-20R-18,19-dihydroxy-pseudovincadifformine (+)-(20R)-18,19-Dihydroxy-y-vincad	COC(=O)C1=C2Nc3ccccc3C24CCN5CC(CC(C1)C45)C(O)CO	C21H26N2O4	370.442	KNApSAcK
(+)-20R-Pseudovincadifformine 20R-Pseudovincadifformine	CCC1CC2CC(=C3Nc4ccccc4C35CCN(C1)C25)C(=O)OC	C21H26N2O2	338.443	KNApSAcK
(+)-21-Hydroxylanosta-8,24-dien-3-one	CC(=CCCC(CO)C1CCC2(C)C3=C(CCC12C)C4(C)CCC(=O)C(C)(C)C4CC3)C	C30H48O2	440.701	KNApSAcK
(+)-3',4'-Dihydrostephasubine 3',4'-Dihydrostephasubine	COc1ccc2CC3N(C)CCc4cc(OC)c(Oc5c(O)c(OC)cc6CCN=C(Cc7ccc(Oc1c2)cc7)c56)cc34	C36H36N2O6	592.681	KNApSAcK
(+)-3,13-Clerodadien-16,15-olid-18-oic acid	CC1CCC2(C)C(CCC=C2C(=O)O)C1(C)CCC3=CCOC3=O	C20H28O4	332.434	KNApSAcK
(+)-3,4-Dihydro-3-hydroxygraciline	CN1CCC23C=CC(O)CC12OCc4cc5OCOc5cc34	C17H19NO4	301.337	KNApSAcK
(+)-3,4-Dihydroxy-8,9-(methylenedioxy)pterocarpan	Oc1ccc2C3Oc4cc5OCOc5cc4C3COc2c1O	C16H12O6	300.263	KNApSAcK
(+)-3-Hydroxy-5-(p-hydroxyphenyl)pentanoic acid Niduloic acid	OC(CCc1ccc(O)cc1)CC(=O)O	C11H14O4	210.226	KNApSAcK
(+)-3-O-(3-Hydroxybutyryl)tazettinol	CC(O)CC(=O)OC1CC2N(C)CC3(O)OCc4cc5OCOc5cc4C23C=C1	C21H25NO7	403.426	KNApSAcK
(+)-3-O-demethyl-3-epimacronine	CN1CC2OC(=O)c3cc4OCOc4cc3C25C=CC(O)CC15	C17H17NO5	315.321	KNApSAcK
(+)-3-O-Feruloylcassine	COc1cc(\C=C\C(=O)OC2CCC(CCCCCCCCCCC(=O)C)NC2C)ccc1O	C28H43NO5	473.645	KNApSAcK
(+)-3-[2,4-Dihydroxy-3-(3-methyl-2-butenyl)phenyl]-2,3-dihydro-7-hydroxy-6-(3-me	CC(=CCc1cc2C(=O)C(COc2cc1O)c3ccc(O)c(CC=C(C)C)c3O)C	C25H28O5	408.487	KNApSAcK
(+)-4'-Methylgallocatechin 3'-O-beta-glucopyranoside	COc1c(O)cc(cc1OC2OC(CO)C(O)C(O)C2O)C3Oc4cc(O)cc(O)c4CC3O	C22H26O12	482.435	KNApSAcK
(+)-4-Hydroxy-3-methoxy-8,9-(methylenedioxy)pterocarpan	COc1ccc2C3Oc4cc5OCOc5cc4C3COc2c1O	C17H14O6	314.289	KNApSAcK
(+)-4-Hydroxypanduratin A	CC(=CCC1C(C(CC=C1C)c2ccccc2)C(=O)c3c(O)cc(O)cc3O)C	C25H28O4	392.487	KNApSAcK
(+)-4-Hydroxysarcocapnine	COc1ccc2CC3N(C)CC(O)c4ccc(OC)c(Oc2c1OC)c34	C20H23NO5	357.4	KNApSAcK
(+)-5'-Hydroxygriseofulvin	COC1=CC(=O)C(O)C(C)C12Oc3c(Cl)c(OC)cc(OC)c3C2=O	C17H17ClO7	368.766	KNApSAcK
(+)-5'-Hydroxytelobine	COc1ccc2CC3NCCc4cc5Oc6c(OC)c(O)c7CCN(C)C(Cc8ccc(Oc1c2)cc8)c7c6Oc5cc34	C35H34N2O6	578.654	KNApSAcK
(+)-5(6)-Dihydro-6-hydroxyterrecyclic acid A	CC1(C)CC23C(CC(=O)C2CO)C1CCC3C(=O)O	C15H22O4	266.333	KNApSAcK
(+)-5,4'-Dihydroxy-6-(3'-methylbut-2''-enyl)-2'''-(4'''-hydroxy-4'''-methylethyl	COC1C(Oc2c(CC=C(C)C)c(O)c3C(=O)C(=COc3c12)c4ccc(O)cc4)C(C)(C)O	C26H28O7	452.496	KNApSAcK
(+)-5-Bromoochrephilone 5-Bromoochrephilone	CCC(C)\C=C(/C)\C=C\C1=CC2=C(Br)C(=O)C3(C)OC(=O)C(C3C2=CO1)C(=O)C	C23H25BrO5	461.346	KNApSAcK
(+)-5-Deoxystrigol	CC1=CC(O\C=C\2/C3CC4=C(C3OC2=O)C(C)(C)CCC4)OC1=O	C19H22O5	330.375	KNApSAcK
(+)-5-Methoxy-9-O-demethylhomolycorine (+)-O9-Demethyl-5a-methoxyhomolycorine	COC1C=C2CCN(C)C2C3C1OC(=O)c4cc(O)c(OC)cc34	C18H21NO5	331.363	KNApSAcK
(+)-6,11-Epoxy-isodaucane	CC1CCCC2(C)CCC3C2C1OC3(C)C	C15H26O	222.366	KNApSAcK
(+)-6,8-Di-C-methylpinocembrin 5-methyl ether	COc1c(C)c(O)c(C)c2OC(CC(=O)c12)c3ccccc3	C18H18O4	298.333	KNApSAcK
(+)-6-(2-Hydroxy-3-methoxy-3-methylbutyl)-5,7-dimethoxycoumarin	COc1cc2OC(=O)C=Cc2c(OC)c1CC(O)C(C)(C)OC	C17H22O6	322.353	KNApSAcK
(+)-6-Ethenyl-2,4,5,6-tetrahydro-3,6-dimethyl-a-methylene-2-oxo-5-benzofuranacet	COC(=O)C(=C)C1CC2=C(C)C(=O)OC2=CC1(C)C=C	C16H18O4	274.312	KNApSAcK
(+)-6a-Hydroxymaackiain 6a-Hydroxymaackiain 6a-Hydroxyinermin 3,6a-Dihydroxy-8,9	Oc1ccc2C3Oc4cc5OCOc5cc4C3(O)COc2c1	C16H12O6	300.263	KNApSAcK
(+)-6alpha-Carissanol 6alpha-Carissanol [4aS-(4aalpha,7alpha,8beta)]-4,4a,5,6,7,	CC1=C2C(O)C(CCC2(C)CCC1=O)C(C)(C)O	C15H24O3	252.349	KNApSAcK
(+)-7-(3-Methylbut-2-enyloxy)-8-(2-hydroxy-3-methylbut-3-enyl)coumarin	CC(=CCOc1ccc2C=CC(=O)Oc2c1CC(O)C(=C)C)C	C19H22O4	314.376	KNApSAcK
(+)-7-(3-Methylbut-2-enyloxy)-8-(4-hydroxy-3-methylbut-2-enyl)coumarin	CC(=CCOc1ccc2C=CC(=O)Oc2c1C\C=C(\C)/CO)C	C19H22O4	314.376	KNApSAcK
(+)-7-(6,7-Epoxy-3,7-dimethyl-5-oxooctanoxy)-coumarin	CC(CCOc1ccc2C=CC(=O)Oc2c1)CC(=O)C3OC3(C)C	C19H22O5	330.375	KNApSAcK
(+)-7-epi-Junenol	CC(C)C1CCC2(C)CCCC(=C)C2C1O	C15H26O	222.366	KNApSAcK
(+)-7-Hydroxycostal	CC12CCCC(=C)C1CC(O)(CC2)C(=C)C=O	C15H22O2	234.334	KNApSAcK
(+)-7-Hydroxycostol Petrovin B [2S-(2alpha,4abeta,8aalpha)]-Decahydro-2-hydroxy-	CC12CCCC(=C)C1CC(O)(CC2)C(=C)CO	C15H24O2	236.35	KNApSAcK
(+)-7alpha,8alpha-Epoxyblumenol B	CC(O)C1OC1C2(O)C(=CC(=O)CC2(C)C)C	C13H20O4	240.296	KNApSAcK
(+)-8(1)-Hydroxypinoresinol (+)-8-Hydroxypinoresinol (+)-1-Hydroxypinoresinol	COc1cc(ccc1O)C2OCC3(O)C2COC3c4ccc(O)c(OC)c4	C20H22O7	374.384	KNApSAcK
(+)-8,9-Dihydrostepharine	COc1cc2CCNC3CC4(CCC(=O)C=C4)c(c1OC)c23	C18H21NO3	299.364	KNApSAcK
(+)-8-Hydroxy-5,5-dimethylpeltogynan	CC1(C)OC2Cc3c(O)cc(O)cc3OC2c4cc(O)c(O)cc14	C18H18O6	330.332	KNApSAcK
(+)-8-Hydroxy-alpha-conidendric acid methyl ester	COC(=O)C1(O)Cc2cc(OC)c(O)cc2C(C1CO)c3ccc(O)c(OC)c3	C21H24O8	404.41	KNApSAcK
(+)-8-Hydroxycalamenene	CC(C)C1CCC(C)c2c(O)cc(C)cc12	C15H22O	218.335	KNApSAcK
(+)-9,10-Dihydro-7-iso-jasmonic acid	CCCCCC1C(CC(=O)OC)CCC1=O	C13H22O3	226.312	KNApSAcK
(+)-9-O-Demethylgalwesine	COC1C2OC(=O)c3cc(O)c(OC)cc3C2C4N(C)CCC45OC15	C18H21NO6	347.362	KNApSAcK
(+)-9-O-Demethylhomolycorine (+)-8-O-Demethylhomolycorine (+)-O-Demethylhomolyco	COc1cc2C3C(CC=C4CCN(C)C34)OC(=O)c2cc1O	C17H19NO4	301.337	KNApSAcK
(+)-Abscisyl beta-D-glucopyranoside	C\C(=C\C(=O)OC1OC(CO)C(O)C(O)C1O)\C=C\C2(O)C(=CC(=O)CC2(C)C)C	C21H30O9	426.457	KNApSAcK
(+)-Aclidinomycin B Aclidinomycin B	COC1=C(C)C(=O)C2(O)C3C4C5C(CC(C6OC(O)C(=C2C1=O)N46)N5C)C7OCCN37	C21H25N3O7	431.439	KNApSAcK
(+)-Acora-4(14),8-diene	CC(C)C1CCC(=C)C12CCC(=CC2)C	C15H24	204.351	KNApSAcK
(+)-Acutifolin A Acutifolin A (1R,5R,8R)-rel-(+)-5-Hydroxy-8-(4-hydroxyphenyl)-1	CC(=CCC12C(CCC(O)(C=CC1=O)C2=O)c3ccc(O)cc3)C	C20H22O4	326.386	KNApSAcK
(+)-Aesculitannin E Aesculitannin E	OC1Cc2c(O)cc(O)c(C3C(O)C(Oc4c3c(O)cc(O)c4C5C(O)C(Oc6c5c(O)cc7OC8(Oc9cc(O)cc(O)c9C(C8O)c67)c%10ccc(O)c(O)c%10)c%11ccc(O)c(O)c%11)c%12ccc(O)c(O)c%12)c2OC1c%13ccc(O)c(O)c%13	C60H48O24	1153.01	KNApSAcK
(+)-Ajmaline Ajmalin Cardiorythmine Gilurytmal Ignazin Merabitol Raugalline Rauw	CCC1C2CC3C4N(C)c5ccccc5C46CC(C2C6O)N3C1O	C20H26N2O2	326.433	KNApSAcK
(+)-Ajmalinol	CCC1C2CC3C4N(C)c5cc(O)ccc5C46CC(C2C6O)N3C1O	C20H26N2O3	342.432	KNApSAcK
(+)-Alantolactone Alant camphor Elecampane camphor Eupatal Inula camphor Alantol	CC1CCCC2(C)CC3OC(=O)C(=C)C3C=C12	C15H20O2	232.318	KNApSAcK
(+)-Almuheptolide A	CCOC1CC(=O)OC(C(O)C(O)C1OCC)c2ccccc2	C17H24O6	324.369	KNApSAcK
(+)-Almuheptolide B	CCOC1CCC(=O)OC(C(O)C1O)c2ccccc2	C15H20O5	280.316	KNApSAcK
(+)-alpha-Atlantone (E)-alpha-Atlantone	CC(=CC(=O)\C=C(/C)\C1CCC(=CC1)C)C	C15H22O	218.335	KNApSAcK
(+)-alpha-Barbatene alpha-Barbatene	CC1=CCC2(C)CC1C3(C)CCCC23C	C15H24	204.351	KNApSAcK
(+)-alpha-Bisabolol	CC(=CCCC(C)(O)C1CCC(=CC1)C)C	C15H26O	222.366	KNApSAcK
(+)-alpha-Cadinol	CC(C)C1CCC(C)(O)C2CCC(=CC12)C	C15H26O	222.366	KNApSAcK
(+)-alpha-Carissanol alpha-Carissanol [3R-(3alpha,4abeta,7beta)]-4,4a,5,6,7,8-he	CC1=C2CC(CCC2(C)CC(O)C1=O)C(C)(C)O	C15H24O3	252.349	KNApSAcK
(+)-alpha-Copaene	CC(C)C1CCC2(C)C3CC=C(C)C2C13	C15H24	204.351	KNApSAcK
(+)-alpha-Cyperone Eudesma-4,11-dien-3-one (4aS-cis)-4,4a,5,6,7,8-Hexahydro-1,4a	CC(=C)C1CCC2(C)CCC(=O)C(=C2C1)C	C15H22O	218.335	KNApSAcK
(+)-alpha-Elemene	CC(C)C1=CC(=C(C)C)CCC1(C)C=C	C15H24	204.351	KNApSAcK
(+)-alpha-Hydroxyerysotrine	COC1CC23N(CC=C2C=C1)CC(O)c4cc(OC)c(OC)cc34	C19H23NO4	329.39	KNApSAcK
(+)-alpha-Santalan-12-one	CC(C)C(=O)CCC1(C)C2CC3C(C2)C13C	C15H24O	220.35	KNApSAcK
(+)-alpha-Selinene	CC(=C)C1CCC2(C)CCC=C(C)C2C1	C15H24	204.351	KNApSAcK
(+)-alpha-Viniferin 13b-O-beta-glucopyranoside	OCC1OC(Oc2cc3OC(C4c5cc(O)cc6OC(C(c7cc(O)cc8OC(C(c(c2)c34)c78)c9ccc(O)cc9)c56)c%10ccc(O)cc%10)c%11ccc(O)cc%11)C(O)C(O)C1O	C48H40O14	840.823	KNApSAcK
(+)-alpha-Viniferin lpha-Viniferin	Oc1ccc(cc1)C2Oc3cc(O)cc4C5C(Oc6cc(O)cc(C7C(Oc8cc(O)cc(C2c34)c78)c9ccc(O)cc9)c56)c%10ccc(O)cc%10	C42H30O9	678.682	KNApSAcK
(+)-Alstomacroline	COC(=O)C12C3CC4(C1O)C(C5CC2\C(=C/C)\CN35)N(CC6C7CC8N(C)C(Cc9c8n(C)c%10ccccc9%10)C7COC6(C)O)c%11ccccc4%11	C42H50N4O5	690.87	KNApSAcK
(+)-Ambruticin (+)-Ambruticin S Ambruticin Ambruticin S Antibiotic Acid S NSC 32	CCC1OC(CC=C1C)\C(=C\C(C)\C=C\C2C(C)C2\C=C\C3OC(CC(=O)O)CC(O)C3O)\C	C28H42O6	474.629	KNApSAcK
(+)-Amorpha-4,11-diene	CC1CCC(C2C=C(C)CCC12)C(=C)C	C15H24	204.351	KNApSAcK
(+)-Ampelopsin A Ampelopsin A	OC1C(c2ccc(O)cc2)c3c(O)cc(O)cc3C4C(Oc5cc(O)cc1c45)c6ccc(O)cc6	C28H22O7	470.47	KNApSAcK
(+)-Andirolactone Andirolactone	CC1=CCC2(CC1)OC(=O)C(=C2)C	C11H14O2	178.228	KNApSAcK
(+)-Andrangine	OC1CCN2CCC3c4cc5OCOc5cc4N6C(=O)CC17CCC36C27	C20H22N2O4	354.4	KNApSAcK
(+)-Androyol	COC1=C(Oc2cc(O)cc(O)c2C1=O)c3cc(O)c4OC(C(c5ccc(O)cc5)c4c3O)c6cc(O)cc(O)c6	C30H22O11	558.489	KNApSAcK
(+)-Angchibangkine Angchibangkine	COc1cc2CCN(C)C3Cc4ccc(O)c(Oc5ccc(CC6N(C)CCc7cc8Oc1c(Oc8cc67)c23)cc5)c4	C35H34N2O5	562.655	KNApSAcK
(+)-Antibiotic K 252a (+)-Antibiotic SF 2370 Protein kinase inhibitor K252a SF 2	COC(=O)C1(O)CC2OC1(C)n3c4ccccc4c5c6CNC(=O)c6c7c8ccccc8n2c7c35	C27H21N3O5	467.473	KNApSAcK
(+)-Antibiotic RK 286C (+)-RK 286C Antibiotic RK 286C RK 286C	COC1C(O)CC2OC1(C)n3c4ccccc4c5c6CNC(=O)c6c7c8ccccc8n2c7c35	C27H23N3O4	453.489	KNApSAcK
(+)-Aoifuranone Aoifuranone	CC(=C)C1Cc2c(C)coc2C(=O)C1(C)C=C	C15H18O2	230.302	KNApSAcK
(+)-Aplasmomycin ICI 122378	CC1OC2CC1OC(=O)C3C45OC(CCC4C)C(C)(C)C(O)C\C=C/C6CC(OC(=O)C7C8(OC(CCC8C)C(C)(C)C(O)C\C=C/2)[O-][B+3]([O-]7)([O-]3)[O-]5)C(C)O6	C40H60BO14	775.707	KNApSAcK
(+)-Apoglaziovine	COc1cc2CCN(C)C3Cc4ccc(O)cc4c(c1O)c23	C18H19NO3	297.348	KNApSAcK
(+)-ar-Turmerone (S)-ar-Turmerone ar-Tumerone	CC(CC(=O)C=C(C)C)c1ccc(C)cc1	C15H20O	216.319	KNApSAcK
(+)-Arborescidine A (R)-(+)-Desbromoarborescidine A	C1CCN2CCc3c([nH]c4ccccc34)C2C1	C15H18N2	226.317	KNApSAcK
(+)-Arbusculin A Arbusculin A [3aS-(3aalpha,5abeta,9alpha,9aalpha,9bbeta)]-Decah	CC1(O)CCCC2(C)CCC3C(OC(=O)C3=C)C12	C15H22O3	250.333	KNApSAcK
(+)-Arctigenin	COc1ccc(CC2COC(=O)C2Cc3ccc(O)c(OC)c3)cc1OC	C21H24O6	372.412	KNApSAcK
(+)-Aristolochene	CC1CCCC2=CCC(CC12C)C(=C)C	C15H24	204.351	KNApSAcK
(+)-Aristolone	CC1CCCC2=CC(=O)C3C(C3(C)C)C12C	C15H22O	218.335	KNApSAcK
(+)-Armefolin Armefolin [3aS-(3aalpha,5abeta,6beta,8alpha,9bbeta)]-3a,4,5,5a,6,7	CC1=C2C3OC(=O)C(=C)C3CCC2(C)C(O)CC1O	C15H20O4	264.317	KNApSAcK
(+)-Aromadendrene Aromadendrene (+)-Aromadendr-7(15)-ene	CC1CCC2C1C3C(CCC2=C)C3(C)C	C15H24	204.351	KNApSAcK
(+)-Artecalin [3aS-(3aalpha,5abeta,6beta,9alpha,9aalpha,9bbeta)]-Octahydro-6-hyd	CC1C2C3OC(=O)C(=C)C3CCC2(C)C(O)CC1=O	C15H20O4	264.317	KNApSAcK
(+)-Artegallin Artegallin [3R-(3alpha,3abeta,5aalpha,6beta,9balpha)]-6-(Acetylox	CC1C2CCC3(C)C(CC(=O)C(=C3C2OC1=O)C)OC(=O)C	C17H22O5	306.354	KNApSAcK
(+)-Asperazine Asperazine	O=C1NC(Cc2c[nH]c3c(cccc23)C45CC6N(C4Nc7ccccc57)C(=O)C(Cc8ccccc8)NC6=O)C(=O)NC1Cc9ccccc9	C40H36N6O4	664.752	KNApSAcK
(+)-Aspidospermidine	CCC12CCCN3CCC4(C(CC1)Nc5ccccc45)C23	C19H26N2	282.423	KNApSAcK
(+)-Atherospermoline	COc1cc2CCN(C)C3Cc4ccc(Oc5cccc(CC6N(C)CCc7cc(OC)c(Oc(c1O)c23)cc67)c5)c(O)c4	C36H38N2O6	594.697	KNApSAcK
(+)-Axenol	CC(C)C1CCC(C)C2(CCC(=C2)C)C1O	C15H26O	222.366	KNApSAcK
(+)-Axillaridine A	CC(C1CCC2C3CCC4C(=O)C(=CCC4(C)C3CCC12C)NC(=O)c5ccccc5)N(C)C	C30H42N2O2	462.667	KNApSAcK
(+)-Bebeerine	COc1cc2CCN(C)C3Cc4ccc(O)c(Oc5cc6C(Cc7ccc(Oc(c1O)c23)cc7)N(C)CCc6cc5OC)c4	C36H38N2O6	594.697	KNApSAcK
(+)-Benzastatin E	COCC(O)(CCC(=C(C)C)C)C1Cc2cc(ccc2N1)C(=O)N	C19H28N2O3	332.437	KNApSAcK
(+)-beta-Atlantone beta-Atlantone	CC(=CC(=O)CC(=C)C1CCC(=CC1)C)C	C15H22O	218.335	KNApSAcK
(+)-beta-Bazzanene beta-Bazzanene Bazzanene [R-(R,S)]-1,4-Dimethyl-4-(1-methyl-2	CC1=CCC(C)(CC1)C2(C)CCCC2=C	C15H24	204.351	KNApSAcK
(+)-beta-Copaene	CC(C)C1CCC2(C)C3CCC(=C)C2C13	C15H24	204.351	KNApSAcK
(+)-beta-Costol (+)-Costol beta-Costol Sesquibenihiol Eudesma-4(14),11(13)-dien-	CC12CCCC(=C)C1CC(CC2)C(=C)CO	C15H24O	220.35	KNApSAcK
(+)-beta-Cuparenone beta-Cuparenone beta-Cuparenone	Cc1ccc(cc1)C2(C)CC(=O)CC2(C)C	C15H20O	216.319	KNApSAcK
(+)-beta-Cyclocostunolide beta-Cyclocostunolide[3aS-(3aalpha,5abeta,9aalpha,9bbe	CC12CCCC(=C)C1C3OC(=O)C(=C)C3CC2	C15H20O2	232.318	KNApSAcK
(+)-beta-Cyclopyrethrosin beta-Cyclopyrethrosin [3aR-(3aalpha,4alpha,4aalpha,8be	CC(=O)OC1C2C(CC3(C)C(O)CCC(=C)C13)OC(=O)C2=C	C17H22O5	306.354	KNApSAcK
(+)-beta-Fenchene (1R)-2,2-Dimethyl-5-methylenebicyclo[2.2.1]heptane	CC1(C)CC2CC1CC2=C	C10H16	136.234	KNApSAcK
(+)-beta-Gorgonene beta-Gorgonen beta-Gorgonene	CC(=C)C1CCCC2(C)CCCC(=C)C12	C15H24	204.351	KNApSAcK
(+)-beta-Isolongibornene	CC1(C)CCCC2(C)C3CCC2C(=C)C13	C15H24	204.351	KNApSAcK
(+)-beta-Microbiotene	CC1(C)CCCC1(C)C23CCC(=C)C2C3	C15H24	204.351	KNApSAcK
(+)-beta-Phellandrene	CC(C)C1CCC(=C)C=C1	C10H16	136.234	KNApSAcK
(+)-beta-Rotunol beta-Rotunol [4aR-(4aalpha,6alpha,8aalpha)]-4a,5,6,7,8,8a-hexah	CC(=C)C1CCC2(C)CC(=O)C=C(C)C2(O)C1	C15H22O2	234.334	KNApSAcK
(+)-Bisabola-2,10-diene[1,9]oxide	CC1CC(OC2C=C(C)CCC12)C=C(C)C	C15H24O	220.35	KNApSAcK
(+)-Bisabosqual A Bisabosqual A	CC(=CCCC1(C)Oc2cc(C=O)c(C=O)c3OC4C(C1CCC4(C)O)c23)C	C23H28O5	384.465	KNApSAcK
(+)-Bisabosqual B Bisabosqual B	CC(=CCCC1(C)Oc2cc(CO)c(C=O)c3OC4C(C1CCC4(C)O)c23)C	C23H30O5	386.481	KNApSAcK
(+)-Bisabosqual D Bisabosqual D	CC(C)(O)C(O)CCC1(C)Oc2cc(C=O)c(C=O)c3OC4C(C1CCC4(C)O)c23	C23H30O7	418.48	KNApSAcK
(+)-Bisnorobamegine N,N'-Didemethylobamegine	COc1cc2CCNC3Cc4ccc(O)c(Oc5ccc(CC6NCCc7cc(OC)c(Oc(c1O)c23)cc67)cc5)c4	C34H34N2O6	566.644	KNApSAcK
(+)-Bisnorthalrugosine N,N'-Didemethylthalrugosine	COc1ccc2CC3NCCc4cc(OC)c(O)c(Oc5cc6C(Cc7ccc(Oc1c2)cc7)NCCc6cc5OC)c34	C35H36N2O6	580.67	KNApSAcK
(+)-Blumenol A Blumenol A Roseoside aglycon Vomifoliol	CC(O)\C=C\C1(O)C(=CC(=O)CC1(C)C)C	C13H20O3	224.296	KNApSAcK
(+)-Boldine Boldine d-Boldine	COc1cc2c(CC3N(C)CCc4cc(O)c(OC)c2c34)cc1O	C19H21NO4	327.374	KNApSAcK
(+)-Borneol	CC1(C)C2CCC1(C)C(O)C2	C10H18O	154.249	KNApSAcK
(+)-Bornyl diphosphate (+)-Bornyl pyrophosphate	CC1(C)C2CCC1(C)C(C2)OP(=O)(O)OP(=O)(O)O	C10H20O7P2	314.209	KNApSAcK
(+)-Bornyl piperate	CC1(C)C2CCC1(C)C(C2)OC(=O)\C=C\C=C\c3ccc4OCOc4c3	C22H26O4	354.439	KNApSAcK
(+)-Bottrospicatol	CC1=CCC2CC1OC2(C)CO	C10H16O2	168.233	KNApSAcK
(+)-Breoganine Culacorine	COc1cc2Oc3c(O)ccc4CCN(C)C(Cc2cc1O)c34	C18H19NO4	313.348	KNApSAcK
(+)-Brothenolide Brothenolide (3aR,5aR,6aS,7aS,7bS,7cS)-Decahydro-5a,7a-dimethyl	CC12CCC3C(OC(=O)C3=C)C1C4(C)CC4C2	C15H20O2	232.318	KNApSAcK
(+)-Bullatantriol Bullatantriol (1R,3aR,4R,7S,7aR)-Octahydro-1-(2-hydroxy-2-meth	CC(C)(O)CC1CCC2(C)C(O)CCC(C)(O)C12	C15H28O3	256.381	KNApSAcK
(+)-Buphanisine	COC1CC2N3CCC2(C=C1)c4cc5OCOc5cc4C3	C17H19NO3	285.338	KNApSAcK
(+)-Butalactin Butalactin	CC1OC1\C=C\C(=O)C2(O)C(CO)COC2=O	C11H14O6	242.225	KNApSAcK
(+)-Buxabenzamidienine	CC(C1CCC2(C)C3CCC4C(=CC3=CCC12C)CCC(NC(=O)c5ccccc5)C4(C)C)N(C)C	C33H48N2O	488.747	KNApSAcK
(+)-Buxabenzamidine	CC(C1CCC2(C)C3CCC4C(CCC(NC(=O)c5ccccc5)C4(C)C)CC3=CCC12C)N(C)C	C33H50N2O	490.763	KNApSAcK
(+)-Buxamine F	CC(C1CCC2(C)C3CCC4C(=CC3=CCC12C)CCC(N)C4(C)C)N(C)C	C26H44N2	384.641	KNApSAcK
(+)-Buxanoldine	CC(C1C(O)CC2(C)C3CCC4C(=CCC(NC(=O)c5ccccc5)C4(C)COC(=O)C)CC3=CCC12C)N(C)C	C35H50N2O4	562.783	KNApSAcK
(+)-Byakangelicin Byakangelicin	COc1c2C=CC(=O)Oc2c(OCC(O)C(C)(C)O)c3occc13	C17H18O7	334.321	KNApSAcK
(+)-Cabreuva oxide A Cabreuva oxide A	CC1=CC2CC(C)(OC(C)(C)C2CC1)C=C	C15H24O	220.35	KNApSAcK
(+)-Calamenene (+)-cis-Calamenene	CC(C)C1CCC(C)c2ccc(C)cc12	C15H22	202.335	KNApSAcK
(+)-Calcaridine A	COC(c1ccc(OC)cc1)C2(Cc3ccc(O)cc3)N=C(N)N(C)C2=O	C20H23N3O4	369.414	KNApSAcK
(+)-Caleine E Calein E	CC1CC2OC(=O)C(=C)C2C(CC(C)(O)C(=O)\C=C/1)OC(=O)C(=C)C	C19H24O6	348.39	KNApSAcK
(+)-Calonectrin Calonectrin	CC(=O)OCC12CCC(=CC1OC3C(CC2(C)C34CO4)OC(=O)C)C	C19H26O6	350.406	KNApSAcK
(+)-Calycanthine Calycanthine	CN1CCC23C4Nc5ccccc5C2(CCN4C)C1Nc6ccccc36	C22H26N4	346.469	KNApSAcK
(+)-Camphene	CC1(C)C2CCC(C2)C1=C	C10H16	136.234	KNApSAcK
(+)-Camphor Camphor	CC1(C)C2CCC1(C)C(=O)C2	C10H16O	152.233	KNApSAcK
(+)-Candicusine (+)-12-O-Demethyllimacusine	COc1cc2CCN(C)C3Cc4ccc(Oc5cc(CC6N(C)CCc7cc(OC)c(Oc(c1O)c23)cc67)ccc5O)cc4	C36H38N2O6	594.697	KNApSAcK
(+)-Carbazomadurin B Carbazomadurin B	CCC(C)CC\C(=C\c1c(C)c(O)cc2c1[nH]c3c(O)ccc(CO)c23)\C	C23H29NO3	367.481	KNApSAcK
(+)-Carene	CC1=CCC2C(C1)C2(C)C	C10H16	136.234	KNApSAcK
(+)-Carvomenthene (+)-p-Menth-1-ene	CC(C)C1CCC(=CC1)C	C10H18	138.25	KNApSAcK
(+)-Carvotanacetone	CC(C)C1CC=C(C)C(=O)C1	C10H16O	152.233	KNApSAcK
(+)-Caryachine-N-oxide	COc1cc2CC3c4cc5OCOc5cc4CC(c2cc1O)N3(=O)C	C19H19NO5	341.358	KNApSAcK
(+)-Caryachine	COc1cc2CC3N(C)C(Cc4cc5OCOc5cc34)c2cc1O	C19H19NO4	325.358	KNApSAcK
(+)-Cassythicine Cassythicine N-Methylactinodaphnine (+)-N-Methylactinodaphnine	COc1cc2c(CC3N(C)CCc4cc5OCOc5c2c34)cc1O	C19H19NO4	325.358	KNApSAcK
(+)-Catechin 3-O-beta-D-galactopyranoside	OCC1OC(OC2Cc3c(O)cc(O)cc3OC2c4ccc(O)c(O)c4)C(O)C(O)C1O	C21H24O11	452.409	KNApSAcK
(+)-Catechin 6-C-beta-D-glucopyranoside	OCC1OC(C(O)C(O)C1O)c2c(O)cc3OC(C(O)Cc3c2O)c4ccccc4	C21H24O9	420.41	KNApSAcK
(+)-Catechin D-Catechin (+)-3',4',5,7-Tetrahydroxy-2,3-trans-flavan-3-ol Dexcyan	OC1Cc2c(O)cc(O)cc2OC1c3ccc(O)c(O)c3	C15H14O6	290.268	KNApSAcK
(+)-Catechin-7-O-beta-D-xylopyranoside Catechin 7-O-beta-D-xylopyranoside	OC1COC(Oc2cc(O)c3CC(O)C(Oc3c2)c4ccc(O)c(O)c4)C(O)C1O	C20H22O10	422.383	KNApSAcK
(+)-Cavidine Cavidine	COc1cc2CCN3Cc4c5OCOc5ccc4C(C)C3c2cc1OC	C21H23NO4	353.412	KNApSAcK
(+)-CC 1065 Antibiotic CC 1065 CC 1065 MCMC 10279 NSC 298223 Rachelmycin	COc1c(O)c2N(CCc2c3cc([nH]c13)C(=O)N4CCc5c4c(O)c(OC)c6[nH]c(cc56)C(=O)N7CC8CC89C7=CC(=O)c%10[nH]cc(C)c9%10)C(=O)N	C37H33N7O8	703.7	KNApSAcK
(+)-Cedronellone	CC1(C)C2CC1C3=C(C2)OC4(CC3)C5CC(CC4=O)C5(C)C	C20H28O2	300.435	KNApSAcK
(+)-Celtisine	COc1cc2CC3N(C)CCc4ccc(O)c(Oc2cc1O)c34	C18H19NO4	313.348	KNApSAcK
(+)-Chamecynenol (1alpha,4aalpha,7alpha,8aalpha)-(+)-7-ethynyl-1,2,4a,5,6,7,8,8a	CC12CCC(CC1C(CO)CC=C2)C#C	C14H20O	204.308	KNApSAcK
(+)-Cheimonophyllal Cheimonophyllal	CC(C)CC(=O)C1=C(C=O)C2CCC(C)(O)C(O)C2O1	C15H22O5	282.332	KNApSAcK
(+)-Cheratamine Cheratamine	COc1cc2CCN(C)C3Cc4ccc(Oc5cc(ccc5O)C(=O)C6=NCCc7cc(OC)c(OC)c(Oc1cc23)c67)cc4	C36H34N2O7	606.664	KNApSAcK
(+)-Chiloscypholone Chiloscypholone	CC1CCCC2(O)CCC(C(=O)C(=C)C)C12C	C15H24O2	236.35	KNApSAcK
(+)-Chimonanthine	CN1CCC2(C1Nc3ccccc23)C45CCN(C)C4Nc6ccccc56	C22H26N4	346.469	KNApSAcK
(+)-Chrysotricine	Cn1ccc2c3ccccc3nc2c1CC4(C)CCC(O4)C(C)(C)O	C21H26N2O2	338.443	KNApSAcK
(+)-Cineverine (3',4'-dimethoxybenzoyl)-13-oxylupanine 13-Veratroyloxylupanine 1	COc1ccc(cc1OC)C(=O)OC2CC3C4CC(CN3C(=O)C2)C5CCCC(=O)N5C4	C24H30N2O6	442.505	KNApSAcK
(+)-cis-Isopulegone (2R-cis)-5-methyl-2-(1-methylethenyl)-cyclohexanone	CC1CCC(C(=C)C)C(=O)C1	C10H16O	152.233	KNApSAcK
(+)-cis-Khellactone	CC1(C)Oc2ccc3C=CC(=O)Oc3c2C(O)C1O	C14H14O5	262.258	KNApSAcK
(+)-cis-p-Mentha-1(7),8-dien-2-ol	CC(=C)C1CCC(=C)C(O)C1	C10H16O	152.233	KNApSAcK
(+)-cis-p-Mentha-2,8-dien-1-ol	CC(=C)C1CCC(C)(O)C=C1	C10H16O	152.233	KNApSAcK
(+)-Clavicoronic acid Clavacoronic acid Clavicoronic acid	CC1=C(C(=O)C(=O)O)C(=CC2CC(C)(C)CC12)C=O	C15H18O4	262.301	KNApSAcK
(+)-Claviculine Claviculine	COc1ccc2CC3N(C)CCc4ccc(O)c(Oc2c1O)c34	C18H19NO4	313.348	KNApSAcK
(+)-Clolimalongine Clolimalongine	COC1=CCC2(C(Cl)CC34NCCC23CC(=O)C(=C4OC)OC)C1=O	C18H22ClNO5	367.824	KNApSAcK
(+)-Cnicin Cnicin	C\C\1=C/CC\C(=C\C2OC(=O)C(=C)C2C(C1)OC(=O)C(=C)C(O)CO)\CO	C20H26O7	378.416	KNApSAcK
(+)-Coccuorbiculatine A	COc1ccc2CC3=[N+](C)CCc4cc(OC)c(Oc5c(O)cc6C(Cc7ccc(Oc1c2)cc7)[N+](C)(C)CCc6c5OC)cc34	C38H42N2O6	622.75	KNApSAcK
(+)-Coclaurine (+)-R-Coclaurine (R)-Coclaurine Sanjoinine K d-Coclaurine	COc1cc2CCNC(Cc3ccc(O)cc3)c2cc1O	C17H19NO3	285.338	KNApSAcK
(+)-Cocsuline (+)-Efirine (+)-Trigilletine Cocsulin Efirine Trigilletine	COc1cc2CCN(C)C3Cc4ccc(Oc5cc(CC6N(C)CCc7cc8Oc1c(Oc8cc67)c23)ccc5O)cc4	C35H34N2O5	562.655	KNApSAcK
(+)-Codamine (S)-(+)-Codamine L-(+)-Codamine Codamine	COc1ccc(CC2N(C)CCc3cc(OC)c(O)cc23)cc1OC	C20H25NO4	343.417	KNApSAcK
(+)-Codonopsine	COc1ccc(cc1OC)C2C(O)C(O)C(C)N2C	C14H21NO4	267.321	KNApSAcK
(+)-Concanamycin F (+)-Concanolide A Concanamycin 4B Concanamycin F Concanolide	CCC1C(O)C(C)C\C(=C\C=C\C(OC)C(OC(=O)\C(=C/C(=C/C(C)C1O)/C)\OC)C(C)C(O)C(C)C2(O)CC(O)C(C)C(O2)\C=C\C)\C	C39H64O10	692.919	KNApSAcK
(+)-Coralloidin E Coralloidin E trans-(+)-4,4a,5,6,7,8-Hexahydro-alpha,alpha,4a,	CC1CCCC2(C)CC=C(C=C12)C(C)(C)O	C15H24O	220.35	KNApSAcK
(+)-Coreximine	COc1cc2CN3CCc4cc(OC)c(O)cc4C3Cc2cc1O	C19H21NO4	327.374	KNApSAcK
(+)-Corybulbine Corybulbine	COc1cc2C3C(C)c4ccc(OC)c(OC)c4CN3CCc2cc1O	C21H25NO4	355.427	KNApSAcK
(+)-Corycavine	CC1C(=O)c2cc3OCOc3cc2CCN(C)Cc4c5OCOc5ccc14	C21H21NO5	367.395	KNApSAcK
(+)-Corynoline Corynoline	CN1Cc2c3OCOc3ccc2C4(C)C(O)Cc5cc6OCOc6cc5C14	C21H21NO5	367.395	KNApSAcK
(+)-Corytuberine Corytuberine	COc1ccc2CC3N(C)CCc4cc(OC)c(O)c(c34)c2c1O	C19H21NO4	327.374	KNApSAcK
(+)-Costal Costic aldehyde (+)-beta-Costal Eudesma-4(14),11(13)-dien-12-al	CC12CCCC(=C)C1CC(CC2)C(=C)C=O	C15H22O	218.335	KNApSAcK
(+)-Crocacin A Crocacin Crocacin A	COC(\C=C\c1ccccc1)C(C)C(OC)C(C)\C=C\C(=C\C(=O)N\C=C/C\C=C/C(=O)NCC(=O)OC)\C	C31H42N2O6	538.675	KNApSAcK
(+)-Cuprenenol Cuprenenol	CC1(C)CCCC1(C)C2CCC(C)(O)C=C2	C15H26O	222.366	KNApSAcK
(+)-Curcudiol (S)-(+)-Curcudiol Curcudiol	CC(CCCC(C)(C)O)c1ccc(C)cc1O	C15H24O2	236.35	KNApSAcK
(+)-Curcuphenol (S)-(+)-Curcuphenol (S)-Curcuphenol	CC(CCC=C(C)C)c1ccc(C)cc1O	C15H22O	218.335	KNApSAcK
(+)-Curzeone	CC1CCc2c(C)cc3occ(C)c3c2C1=O	C15H16O2	228.286	KNApSAcK
(+)-Cyanocycline A Cyanocycline A Cyanonaphthyridinomycin NSC 349644	COC1=C(C)C(=O)C2=C(C(CO)N3C(C#N)C4CC5C6OCCN6C2C3C5N4C)C1=O	C22H26N4O5	426.466	KNApSAcK
(+)-Cycleabarbatine	COc1ccc2CC3N(C)CCc4cc(O)c(OC)c(Oc5cc6C(Cc7ccc(Oc1c2)cc7)N(C)CCc6cc5OC)c34	C37H40N2O6	608.723	KNApSAcK
(+)-Cycleanorine Cycleaneonine (+)-Cycleaneonine	COc1cc2CCN(C)C3Cc4ccc(COc5c(O)c6C(Cc7ccc(Oc(c1OC)c23)cc7)N(C)CCc6cc5OC)cc4	C38H42N2O6	622.75	KNApSAcK
(+)-Cycleatjehenine Cycleatjehenine	COc1ccc2CC3N(C)CCc4cc(OC)c(OCc5ccc(Cc6nccc7cc(OC)c(Oc1c2)cc67)cc5)c(O)c34	C37H36N2O6	604.692	KNApSAcK
(+)-Cycleatjehine Cycleatjehine	COc1cc2ccnc3Cc4ccc(COc5c(O)c6C(Cc7ccc(O)c(Oc1cc23)c7)N(C)CCc6cc5OC)cc4	C36H34N2O6	590.665	KNApSAcK
(+)-Cyclobuxamidine	CNC(C)C1CCC2(C)C3CCC4C(=C)C(CCC45CC35CCC12C)N(C)C(=O)C	C27H44N2O	412.651	KNApSAcK
(+)-Cyclochampedol Cyclochampedol (+)-2,3,8,10-Tetrahydroxy-6-(2-methyl-1-propen	CC(=CC1Oc2c(O)c(O)ccc2C3=C1C(=O)c4c(O)cc(O)cc4O3)C	C20H16O7	368.337	KNApSAcK
(+)-Cyclocinamide A	Cn1cc(Cl)cc1C(=O)NCC(=O)NC2CNC(=O)C(Cc3c[nH]c4ccc(Br)cc34)NC(=O)C(O)CNC(=O)C(CC(=O)N)NC2=O	C29H33BrClN9O8	750.985	KNApSAcK
(+)-Cycloolivil 4'-O-beta-D-glucopyranoside	COc1cc2CC(O)(CO)C(CO)C(c3ccc(OC4OC(CO)C(O)C(O)C4O)c(OC)c3)c2cc1O	C26H34O12	538.541	KNApSAcK
(+)-Cycloolivil	COc1cc2CC(O)(CO)C(CO)C(c3ccc(O)c(OC)c3)c2cc1O	C20H24O7	376.4	KNApSAcK
(+)-cyclopentanecarboxylic acid Xanthocidin (+)-Xanthocidin	CC(C)C1(O)C(C(=O)O)C(=C)C(=O)C1(C)O	C11H16O5	228.242	KNApSAcK
(+)-Cyclophellitol Cyclophellitol	OCC1C(O)C(O)C(O)C2OC12	C7H12O5	176.167	KNApSAcK
(+)-Cyclosativene Cyclosativene	CC(C)C1CCC2(C)C3CC4C(C13)C24C	C15H24	204.351	KNApSAcK
(+)-Cyclosordariolone	CC1(O)C(=O)C=Cc2c(CO)c(O)ccc12	C12H12O4	220.221	KNApSAcK
(+)-Cyclotryprostatin A Cyclotryprostatin A Cyclotryprostatine A	COc1ccc2c3C(O)C4(O)N(C(C=C(C)C)c3[nH]c2c1)C(=O)C5CCCN5C4=O	C22H25N3O5	411.451	KNApSAcK
(+)-Cyclotryprostatin B Cyclotryprostatin B Cyclotryprostatine B	COC1c2c([nH]c3cc(OC)ccc23)C(C=C(C)C)N4C(=O)C5CCCN5C(=O)C14O	C23H27N3O5	425.478	KNApSAcK
(+)-Cyclotryprostatin C Cyclotryprostatin C Cyclotryprostatine C	CC(=CC1N2C(=O)C3CCCN3C(=O)C2(O)C(O)c4c1[nH]c5ccccc45)C	C21H23N3O4	381.425	KNApSAcK
(+)-Cyclotryprostatin D Cyclotryprostatin D Cyclotryprostatine D	CC(=CC1N2C(=O)C3CCCN3C(=O)C2(O)C(=O)c4c1[nH]c5ccccc45)C	C21H21N3O4	379.409	KNApSAcK
(+)-Daphnandrine O12'-Methyldaphnoline Daphnandrine	COc1ccc2CC3NCCc4cc(OC)c(Oc5c(O)c(OC)cc6CCN(C)C(Cc7ccc(Oc1c2)cc7)c56)cc34	C36H38N2O6	594.697	KNApSAcK
(+)-Decarestrictin L (+)-Decarestrictine L Decarestrictin L SM 240	CC1CCC(O)C(CC(=O)C)O1	C9H16O3	172.222	KNApSAcK
(+)-Decipienin A 11alpha-Angeloyloxy-a-santonin [3S-[3alpha(Z),3aalpha,5aalpha,9	C\C=C(\C)/C(=O)OC1(C)C2CCC3(C)C=CC(=O)C(=C3C2OC1=O)C	C20H24O5	344.402	KNApSAcK
(+)-Dehydrosolanascone	CC1=CC(=O)C2CC3(C)C4CCC1(C4)C23C	C15H20O	216.319	KNApSAcK
(+)-Dehydrovoachalotine Dehydrovoachalotine	COC(=O)C12COC3C1N4C\C(=C\C)\C2CC4c5c3c6ccccc6n5C	C22H24N2O3	364.438	KNApSAcK
(+)-Dehydrovomifoliol Dehydrovomifoliol S-(+)-Dehydrovomifoliol	CC(=O)\C=C\C1(O)C(=CC(=O)CC1(C)C)C	C13H18O3	222.28	KNApSAcK
(+)-Demethylcoclaurine	Oc1ccc(CC2NCCc3cc(O)c(O)cc23)cc1	C16H17NO3	271.311	KNApSAcK
(+)-Denudatin B	COc1ccc(cc1OC)C2OC3=CC(=O)C(=CC3(OC)C2C)CC=C	C21H24O5	356.412	KNApSAcK
(+)-Diaeudesmin	COc1ccc(cc1OC)C2OCC3C2COC3c4ccc(OC)c(OC)c4	C22H26O6	386.438	KNApSAcK
(+)-Diayangambin	COc1cc(cc(OC)c1OC)C2OCC3C2COC3c4cc(OC)c(OC)c(OC)c4	C24H30O8	446.49	KNApSAcK
(+)-Dicentrine Dicentrine Eximine O,N-Dimethyllitseferine d-Dicentrine	COc1cc2CC3N(C)CCc4cc5OCOc5c(c34)c2cc1OC	C20H21NO4	339.385	KNApSAcK
(+)-Dictyopanine A Dictyopanin A Dictyopanine A	CCCC\C=C(/C)\C=C\C(=O)OC1CCC(CO)C2(C)C(CC(=C)C=O)C(=O)C=C12	C25H34O5	414.534	KNApSAcK
(+)-Dictyopanine B Dictyopanin B Dictyopanine B	CCC(C)\C=C(/C)\C=C\C(=O)OC1CCC(C(=O)O)C2(C)C(CC(=C)C=O)C(=O)C=C12	C25H32O6	428.518	KNApSAcK
(+)-Dictyopanine C Dictyopanin C Dictyopanine C	CCC(C)\C=C(/C)\C=C\C=C\C(=O)OC1CCC(C(=O)O)C2(C)C(CC(=C)C=O)C(=O)C=C12	C27H34O6	454.555	KNApSAcK
(+)-Dienomycin C Dienomycin C	CC1C(O)CCNC1\C=C\C=C\c2ccccc2	C16H21NO	243.344	KNApSAcK
(+)-Dihydrochiloscypholone	CC(C)C(=O)C1CCC2(O)CCCC(C)C12C	C15H26O2	238.366	KNApSAcK
(+)-Dihydrocompactin 4a,5-Dihydrocompactin Dihydrocompactin	CCC(C)C(=O)OC1CCCC2C=CC(C)C(CCC3CC(O)CC(=O)O3)C12	C23H36O5	392.529	KNApSAcK
(+)-Dihydrocostunolide 11betaH,13-Dihydrocostunolide Dihydrocostunolide	CC1C2CC\C(=C\CC\C(=C\C2OC1=O)\C)\C	C15H22O2	234.334	KNApSAcK
(+)-Dihydrodehydrodiconiferyl alcohol	COc1cc(ccc1O)C2Oc3c(OC)cc(CCCO)cc3C2CO	C20H24O6	360.401	KNApSAcK
(+)-Dihydroeleutherinol	CC1CC(=O)c2c(C)cc3cc(O)cc(O)c3c2O1	C15H14O4	258.269	KNApSAcK
(+)-Dihydrofrullanolide	CC1C2CCC3(C)CCCC(=C3C2OC1=O)C	C15H22O2	234.334	KNApSAcK
(+)-Dihydroisorhamnetin Dihydroisorhamnetin	COc1cc(ccc1O)C2Oc3cc(O)cc(O)c3C(=O)C2O	C16H14O7	318.278	KNApSAcK
(+)-Dihydrokaempferol (+)-Aromadendrin Katuranin (2R,3R)-2,3-Dihydro-3,5,7-trihy	OC1C(Oc2cc(O)cc(O)c2C1=O)c3ccc(O)cc3	C15H12O6	288.252	KNApSAcK
(+)-Dihydromelitensin	CC1(CC(O)C2C(OC(=O)C2=C)C1C(=C)CO)C=C	C15H20O4	264.317	KNApSAcK
(+)-Dihydroperfamine	COc1c2CCC(=O)C(CC=C(C)C)(OC)c2nc3occc13	C18H21NO4	315.364	KNApSAcK
(+)-Dihydrowighteone (+)-5,7,4'-Trihydroxy-6-prenylisoflavanone	CC(=CCc1c(O)cc2OCC(C(=O)c2c1O)c3ccc(O)cc3)C	C20H20O5	340.37	KNApSAcK
(+)-Discodermolide	CC(C\C(=C/C(C)C(O)C(C)\C=C/C(O)CC1OC(=O)C(C)C(O)C1C)\C)C(O)C(C)C(OC(=O)N)C(C)\C=C/C=C	C33H55NO8	593.792	KNApSAcK
(+)-Discorhabdin A Prianosin A Prianosine A	BrC1=CC23CC(NC4=C2C5=NCCc6c[nH]c(C4=O)c56)SC3CC1=O	C18H14BrN3O2S	416.292	KNApSAcK
(+)-Divaricin A Divaricin A	C\C=C(/C)\C(=O)OC1C2OC(=O)C(=C)C2C(OC(=O)CC(C)C)C3(O)OC(CC3C)CC1(C)O	C25H36O9	480.548	KNApSAcK
(+)-Divaricin C Divaricin C	C\C=C(/C)\C(=O)OC1C2OC(=O)C(=C)C2C(OC(=O)C=C(C)C)C3(O)OC(CC3C)CC1(C)O	C25H34O9	478.532	KNApSAcK
(+)-Dragmacidin F	CC1C2CC(O)(C(=O)c3[nH]cc(C4=CN=C(C(=O)N4)c5c[nH]c6cc(Br)ccc56)c23)c7nc(N)[nH]c17	C25H20BrN7O3	546.375	KNApSAcK
(+)-Duocarmycin A DC 88A Duocarmycin A	COC(=O)C1(C)NC2=C(C1=O)C34CC3CN(C(=O)c5cc6cc(OC)c(OC)c(OC)c6[nH]5)C4=CC2=O	C26H25N3O8	507.492	KNApSAcK
(+)-Duocarmycin C2 Antibiotic SF 2582A Duocarmycin C2 Pyrindamycin Pyrindamycin	COC(=O)C1(C)Nc2c(O)cc3N(CC(CCl)c3c2C1=O)C(=O)c4cc5cc(OC)c(OC)c(OC)c5[nH]4	C26H26ClN3O8	543.953	KNApSAcK
(+)-duocarmycin SA Antibiotic DC 113 Duocarmycin SA	COC(=O)c1cc2c([nH]1)C(=O)C=C3N(CC4CC234)C(=O)c5cc6cc(OC)c(OC)c(OC)c6[nH]5	C25H23N3O7	477.466	KNApSAcK
(+)-Dynemicin A BU 3420T Dynemicin A	COC1=C(C(C)C23OC24C1C#C\C=C/C#CC3Nc5c6C(=O)c7c(O)ccc(O)c7C(=O)c6c(O)cc45)C(=O)O	C30H19NO9	537.473	KNApSAcK
(+)-Eburnamenine	CCC12CCCN3CCc4c(C13)n(C=C2)c5ccccc45	C19H22N2	278.391	KNApSAcK
(+)-Eburnamonine (+)-Vincamone (+)-cis-Eburnamonine (+)-cis-Vincamone d-Eburnamo	CCC12CCCN3CCc4c(C13)n(C(=O)C2)c5ccccc45	C19H22N2O	294.391	KNApSAcK
(+)-Echinoisoflavanone	COc1ccc(c(OC)c1CC=C(C)C)C2(O)COc3cc(O)cc(O)c3C2=O	C22H24O7	400.422	KNApSAcK
(+)-EI 1507-1 EI 1507-1	COc1cccc2C(=O)C34OC3(C=CC5=C4C(=O)CC(C)(O)C5)C(O)c12	C20H18O6	354.353	KNApSAcK
(+)-EI 1507-2 EI 1507-2 Sch 58450	COc1cccc2C(O)C34OC3(C=CC5=C4C(=O)CC(C)(O)C5)C(O)c12	C20H20O6	356.369	KNApSAcK
(+)-Elaeocarpine	Cc1cccc2OC3CCN4CCCC4C3C(=O)c12	C16H19NO2	257.328	KNApSAcK
(+)-Elaiophylin Antibiotic 5001B Antibiotic 56-62 Antibiotic A 164AB Azalomycin	CCC1C(C)OC(O)(CC1OC2CC(O)C(O)C(C)O2)C(C)C(O)C(C)C3OC(=O)\C=C\C=C\C(C)C(OC(=O)\C=C\C=C\C3C)C(C)C(O)C(C)C4(O)CC(OC5CC(O)C(O)C(C)O5)C(CC)C(C)O4	C54H88O18	1025.27	KNApSAcK
(+)-Eldanolide 2(3H)-Furanone	CC1CC(=O)OC1CC=C(C)C	C10H16O2	168.233	KNApSAcK
(+)-Elemacarmanin Elemacarmanin	COC(=O)C(=C)C1C(O)C(C(=C)CO)C(C)(CC1OC(=O)C(=C)CO)C=C	C20H28O7	380.432	KNApSAcK
(+)-Eleutherin Eleutherin	COc1cccc2C(=O)C3=C(C(C)OC(C)C3)C(=O)c12	C16H16O4	272.296	KNApSAcK
(+)-Elisin	CC(=C)C1Cc2c(O)c3C=CC(=O)Oc3cc2O1	C14H12O4	244.243	KNApSAcK
(+)-Enneaphylline Enneaphylline	COc1cc2Oc3c(OC)ccc4CCN(C)C(Cc2cc1O)c34	C19H21NO4	327.374	KNApSAcK
(+)-ent-Epicubenol 1-epi-Cubenol epi-Cubenol	CC(C)C1CCC(C)C2(O)CCC(=CC12)C	C15H26O	222.366	KNApSAcK
(+)-epi-Gomeraldehyde	CC1(C)CCCC2(C)C1CCC3(C)OC(C)(CC=O)CCC23	C20H34O2	306.483	KNApSAcK
(+)-Epiaschantin	COc1cc(cc(OC)c1OC)C2OCC3C2COC3c4ccc5OCOc5c4	C22H24O7	400.422	KNApSAcK
(+)-Epicytoskyrin	COc1cc(O)c2C(=O)C3=C(O)C4C(O)C5C6C(O)C(C(=C7C(=O)c8c(O)cc(OC)cc8C(=O)C467)O)C35C(=O)c2c1	C30H22O12	574.488	KNApSAcK
(+)-Epiepoxydon	OCC1=CC(O)C2OC2C1=O	C7H8O4	156.136	KNApSAcK
(+)-Epiexcelsin	COc1cc(cc2OCOc12)C3OCC4C3COC4c5cc(OC)c6OCOc6c5	C22H22O8	414.405	KNApSAcK
(+)-Epigallocatechin	OC1Cc2c(O)cc(O)cc2OC1c3cc(O)c(O)c(O)c3	C15H14O7	306.267	KNApSAcK
(+)-Epiglaufidine Epiglaufidine	COc1cc2C(O)CN(C)C3Cc4ccc(OC)c(OC)c4c(c1O)c23	C20H23NO5	357.4	KNApSAcK
(+)-Epijasmonic acid 7-iso-Jasmonic acid	CC\C=C/CC1C(CC(=O)O)CCC1=O	C12H18O3	210.27	KNApSAcK
(+)-Epimagnolin A	COc1ccc(cc1OC)C2OCC3C2COC3c4cc(OC)c(OC)c(OC)c4	C23H28O7	416.464	KNApSAcK
(+)-Epipinoresinol	COc1cc(ccc1O)C2OCC3C2COC3c4ccc(O)c(OC)c4	C20H22O6	358.385	KNApSAcK
(+)-Episesamin	C1Oc2ccc(cc2O1)C3OCC4C3COC4c5ccc6OCOc6c5	C20H18O6	354.353	KNApSAcK
(+)-Epitodomatuic acid Epitodomatuic acid	CC(C)CC(=O)CC(C)C1CCC(=CC1)C(=O)O	C15H24O3	252.349	KNApSAcK
(+)-Epolactaene Epolactaene	COC(=O)\C(=C\C)\C=C(/C)\C=C\CC\C=C(/C)\C(=O)C12OC1C(C)(O)NC2=O	C21H27NO6	389.442	KNApSAcK
(+)-Epoxydon monoacetate	CC(=O)OCC1=CC(O)C2OC2C1=O	C9H10O5	198.173	KNApSAcK
(+)-epsilon-Viniferin	Oc1ccc(\C=C\c2cc(O)cc3OC(C(c4cc(O)cc(O)c4)c23)c5ccc(O)cc5)cc1	C28H22O6	454.471	KNApSAcK
(+)-Eremoacetal	CC(=CC1CC2(C)CCC(O1)(O2)c3cocc3)C	C15H20O3	248.317	KNApSAcK
(+)-Erromangine 14-Epi-(+)-isostephodeline Erromangine	COC1=C(OC)C(=O)C2C3Cc4cc(OC)c(OC)cc4C2(CCN3C)C1	C21H27NO5	373.443	KNApSAcK
(+)-Erythravine	COc1cc2CCN3CC=C4C=CC(O)CC34c2cc1OC	C18H21NO3	299.364	KNApSAcK
(+)-Eschscholtzidine N-oxide	COc1cc2CC3c4cc5OCOc5cc4CC(c2cc1OC)N3(=O)C	C20H21NO5	355.384	KNApSAcK
(+)-Espicufolin (R)-(+)-Espicufolin (R)-Espicufolin CU 39 Espicufolin	CCC(C)C1=CC(=O)c2c(CO)cc3C(=O)c4cccc(O)c4C(=O)c3c2O1	C22H18O6	378.375	KNApSAcK
(+)-Etharvendiol	CCOC1C=CC(=O)OC1C(O)C(O)c2ccccc2	C15H18O5	278.3	KNApSAcK
(+)-Eudesma-3,7(11)-dien-8-one	CC(=C1CC2C(=CCCC2(C)CC1=O)C)C	C15H22O	218.335	KNApSAcK
(+)-Farfugin A (9S)-6,7,8,9-Tetrahydro-3,5,9-trimethylnaphtho[1,2-b]furan	CC1CCCc2c(C)cc3c(C)coc3c12	C15H18O	214.303	KNApSAcK
(+)-Fargesin	COc1ccc(cc1OC)C2OCC3C2COC3c4ccc5OCOc5c4	C21H22O6	370.396	KNApSAcK
(+)-Fenchone Fenchone	CC12CCC(C1)C(C)(C)C2=O	C10H16O	152.233	KNApSAcK
(+)-Fendlerine	CCC(=O)N1C2CCC34CCCN5CCC2(c6ccc(OC)c(O)c16)C35OCC4	C23H30N2O4	398.495	KNApSAcK
(+)-Flavinantine	COC1=CC23CCN(C)C(Cc4cc(OC)c(O)cc24)C3=CC1=O	C19H21NO4	327.374	KNApSAcK
(+)-Formylharappamine N-Formylharappamine	CC(C1CCC2(C)C3CCC4C(=CC3=CCC12C)CCC5N(C)CCOC45C)N(C)C=O	C28H44N2O2	440.661	KNApSAcK
(+)-FR 182877 Cyclostreptin FR 182877 WS 9885B	CC1C(O)C2C=C(C)C3CC4C(C3C2C1O)C5=C6OC4(C)CCC(OC5=O)C6C	C24H32O5	400.508	KNApSAcK
(+)-Frullanolide [3aR-(3aalpha,5abeta,9balpha)]-3a,4,5,5a,6,7,8,9b-Octahydro-5a,	CC1=C2C3OC(=O)C(=C)C3CCC2(C)CCC1	C15H20O2	232.318	KNApSAcK
(+)-Fudecalone FO 2030 Fudecalone	CC1=CC(=O)C2C(C)(C)CCCC23C(O)OCC13	C15H22O3	250.333	KNApSAcK
(+)-Galbacin	CC1C(C)C(OC1c2ccc3OCOc3c2)c4ccc5OCOc5c4	C20H20O5	340.37	KNApSAcK
(+)-Galwesine	COC1C2OC(=O)c3cc(OC)c(OC)cc3C2C4N(C)CCC45OC15	C19H23NO6	361.389	KNApSAcK
(+)-gamma-Costal gamma-Costal Iso-beta-costal (2R-cis)- 1,2,3,4,4a,5,6,7-Octahyd	CC1=C2CC(CCC2(C)CCC1)C(=C)C=O	C15H22O	218.335	KNApSAcK
(+)-gamma-Costol gamma-Costol (2R-cis)-1,2,3,4,4a,5,6,7-Octahydro-4a,8-dimethyl-	CC1=C2CC(CCC2(C)CCC1)C(=C)CO	C15H24O	220.35	KNApSAcK
(+)-gamma-Gurjunene gamma-Gurjunene	CC1CCC(C=C2C(C)CCC12)C(=C)C	C15H24	204.351	KNApSAcK
(+)-Ganoderic acid K 3beta,15alpha-Dihydroxy-7,11,23-trioxo-5alpha-lanost-8-en-2	CC(CC(=O)CC(C)C(=O)O)C1CC(=O)C2(C)C3=C(C(=O)C(OC(=O)C)C12C)C4(C)CCC(O)C(C)(C)C4CC3O	C32H46O9	574.702	KNApSAcK
(+)-Ganoderic acid Mf 3alpha-Acetoxy-15alpha-hydroxy-5alpha-lanosta-7,9(11),24E-	CC(CC\C=C(/C)\C(=O)O)C1CC(O)C2(C)C3=CCC4C(C)(C)C(CCC4(C)C3=CCC12C)OC(=O)C	C32H48O5	512.721	KNApSAcK
(+)-Ganoderiol A Ganoderiol A 5alpha-Lanosta-7,9(11)-diene-3beta,24,25,26-tetrao	CC(CCC(O)C(C)(O)CO)C1CCC2(C)C3=CCC4C(C)(C)C(O)CCC4(C)C3=CCC12C	C30H50O4	474.716	KNApSAcK
(+)-Ganoderiol H	CC(CCC(O)C(C)(O)CO)C1CCC2(C)C3=C(CCC12C)C4(C)CCC(O)C(C)(C)C4CC3=O	C30H50O5	490.715	KNApSAcK
(+)-Ganodermanondiol 24(S),25-Dihydroxy-5alpha-lanosta-7,9(11)-dien-3-one	CC(CCC(O)C(C)(C)O)C1CCC2(C)C3=CCC4C(C)(C)C(=O)CCC4(C)C3=CCC12C	C30H48O3	456.7	KNApSAcK
(+)-Ganolucidic acid D 15alpha,23-Dihydroxy-3,11-dioxo-5alpha-lanosta-8,24E-dien	CC(CC(O)\C=C(/C)\C(=O)O)C1CC(O)C2(C)C3=C(C(=O)CC12C)C4(C)CCC(=O)C(C)(C)C4CC3	C30H44O6	500.667	KNApSAcK
(+)-Garvensintriol	OC(C(O)c1ccccc1)C2OC(=O)CCC2O	C13H16O5	252.263	KNApSAcK
(+)-Geodin Estin	COC(=O)C1=CC(=O)C=C(OC)C12Oc3c(Cl)c(C)c(Cl)c(O)c3C2=O	C17H12Cl2O7	399.179	KNApSAcK
(+)-Geranin A Geranin A	OC1Cc2c(O)cc3OC4(Oc5cc(O)cc(O)c5C(C4O)c3c2OC1c6ccc(O)cc6)c7ccc(O)cc7	C30H24O10	544.506	KNApSAcK
(+)-Geranin B Geranin B (2R,3S,8S,14R,15R)- 8-(3,4-Dihydroxyphenyl)-3,4-dihydro-	OC1Cc2c(O)cc3OC4(Oc5cc(O)cc(O)c5C(C4O)c3c2OC1c6ccc(O)cc6)c7ccc(O)c(O)c7	C30H24O11	560.505	KNApSAcK
(+)-Geranin D Geranin D	OC1Cc2c(O)cc3OC4(Oc5c(C(C4O)c3c2OC1c6ccc(O)cc6)c(O)cc7OC8(Oc9cc(O)cc(O)c9C(C8O)c57)c%10ccc(O)cc%10)c%11ccc(O)cc%11	C45H34O15	814.742	KNApSAcK
(+)-Glaberide I	COc1cc(cc(OC)c1O)C2OCC3C2COC3=O	C14H16O6	280.273	KNApSAcK
(+)-Globulol	CC1CCC2C1C3C(CCC2(C)O)C3(C)C	C15H26O	222.366	KNApSAcK
(+)-Gomisin A	COc1cc2CC(C)(O)C(C)Cc3cc4OCOc4c(OC)c3c2c(OC)c1OC	C23H28O7	416.464	KNApSAcK
(+)-Gomisin M2	COc1cc2CC(C)C(C)Cc3cc4OCOc4c(O)c3c2c(OC)c1OC	C22H26O6	386.438	KNApSAcK
(+)-Goniopypyrone	OC1C2CC(=O)OC1C(O)C(O2)c3ccccc3	C13H14O5	250.247	KNApSAcK
(+)-Goniotharvensin	OC1C2OC(=O)CCC2OC1c3ccccc3	C13H14O4	234.248	KNApSAcK
(+)-Gossypol	CC(C)c1c(O)c(O)c(C=O)c2c(O)c(c(C)cc12)c3c(C)cc4c(C(C)C)c(O)c(O)c(C=O)c4c3O	C30H30O8	518.554	KNApSAcK
(+)-Graciline	CN1CCC23C=CC=CC12OCc4cc5OCOc5cc34	C17H17NO3	283.322	KNApSAcK
(+)-Graveolide Graveolide 2,3-Dihydroaromaticin [3aR-(3aalpha,4abeta,7aalpha,8al	CC1CC2OC(=O)C(=C)C2CC3(C)C1CCC3=O	C15H20O3	248.317	KNApSAcK
(+)-Gymnomitr-3(15)-en-4alpha-ol	CC12CC(O)C(=C)C(C1)C3(C)CCCC23C	C15H24O	220.35	KNApSAcK
(+)-Gymnomitrol acetate	CC(=O)OC1C2C(=C)CCC1(C)C3(C)CCCC23C	C17H26O2	262.387	KNApSAcK
(+)-Gynunone	CC1COC2C1Oc3cc(O)c(cc23)C(=O)C	C13H14O4	234.248	KNApSAcK
(+)-Hapalindole Q Hapalindole Q	CC(=C)C1CCC(C)(C=C)C(N=C=S)C1c2c[nH]c3ccccc23	C21H24N2S	336.494	KNApSAcK
(+)-Hardwickiic acid	CC1CCC2(C)C(CCC=C2C(=O)O)C1(C)CCc3cocc3	C20H28O3	316.435	KNApSAcK
(+)-Harmicine Harmicine	C1CC2N(C1)CCc3c2[nH]c4ccccc34	C14H16N2	212.29	KNApSAcK
(+)-Harzialactone A Harzialactone A	OC1CC(Cc2ccccc2)OC1=O	C11H12O3	192.211	KNApSAcK
(+)-Harziphilone Harziphilone	C\C=C\C=C\C1=CC2=C(CO1)C(=O)C(C)(O)C(O)C2	C15H18O4	262.301	KNApSAcK
(+)-Hatomarubigin A CE 33A Hatomarubigin A	COc1cccc2C(=O)c3c4C(=O)CC(C)Cc4cc(O)c3C(=O)c12	C20H16O5	336.338	KNApSAcK
(+)-Hatomarubigin B CE 33B Hatomarubigin B	COc1ccc(O)c2C(=O)c3c(ccc4CC(C)CC(=O)c34)C(=O)c12	C20H16O5	336.338	KNApSAcK
(+)-Heliangolidin Heliangolidin	CC1C2C(C\C(=C\CC(=O)\C(=C/C2OC1=O)\C)\C)OC(=O)C	C17H22O5	306.354	KNApSAcK
(+)-Heptelidic acid Avocettin Heptelidic acid Koningic acid	CC(C)C1CCC2(CO2)C3C1C=C(COC3=O)C(=O)O	C15H20O5	280.316	KNApSAcK
(+)-Herbolide F Herbolide F	CC1C2CC(O)C(=C)CCC(O)\C(=C\C2OC1=O)\C	C15H22O4	266.333	KNApSAcK
(+)-Hexacyclinol Hexacyclinol	COC(C)(C)C1C=C2C3C4C(O)C(C5OOC(C=C(C)C)C1(C45)C3=O)C6OC6C2=O	C23H28O7	416.464	KNApSAcK
(+)-Hinokinin	O=C1OCC(Cc2ccc3OCOc3c2)C1Cc4ccc5OCOc5c4	C20H18O6	354.353	KNApSAcK
(+)-Histachimycin Hitachimycin NSC 343256 Stubomycin	COC1CC2\C=C(/C)\C=C\C=C\C(=O)NC(C\C=C\CCC(O)CC(=O)C2=C1O)c3ccccc3	C29H35NO5	477.592	KNApSAcK
(+)-Homoaromoline Homoaromoline Homothalicrine (+)-Thalrugosamine	COc1ccc2CC3N(C)CCc4cc(OC)c(Oc5c(O)c(OC)cc6CCN(C)C(Cc7ccc(Oc1c2)cc7)c56)cc34	C37H40N2O6	608.723	KNApSAcK
(+)-Homobuxaquamarine Homobuxaquamarine	CC1OCC2(C)C(CCC3=CC4=CCC5(C)C(CCC5(C)C4CCC23)C(=O)C)N1C	C27H41NO2	411.62	KNApSAcK
(+)-Hongoquercin A Hongoquercin A	Cc1cc2OC3(C)CCC4C(C)(C)CCCC4(C)C3Cc2c(O)c1C(=O)O	C23H32O4	372.498	KNApSAcK
(+)-Hongoquercin B Hongoquercin B	CC(=O)OC1CCC2(C)C(CCC3(C)Oc4cc(C)c(C(=O)O)c(O)c4CC23)C1(C)C	C25H34O6	430.534	KNApSAcK
(+)-Hopeaphenol	Oc1ccc(cc1)C2Oc3cc(O)cc4C(C5C(c6ccc(O)cc6)c7c(O)cc(O)cc7C8C(Oc9cc(O)cc5c89)c%10ccc(O)cc%10)C(c%11ccc(O)cc%11)c%12c(O)cc(O)cc%12C2c34	C56H42O12	906.925	KNApSAcK
(+)-Horsfiline	COc1ccc2NC(=O)C3(CCN(C)C3)c2c1	C13H16N2O2	232.278	KNApSAcK
(+)-Hupeol	OC1OCC2CC1CN3C(=O)C=CC=C23	C11H13NO3	207.226	KNApSAcK
(+)-Hydantocidin Hydantocidin	OCC1OC2(NC(=O)NC2=O)C(O)C1O	C7H10N2O6	218.164	KNApSAcK
(+)-Hydroxypinoresinol 4,4'-di-O-beta-D-glucopyranoside	COc1cc(ccc1OC2OC(CO)C(O)C(O)C2O)C3OCC4(O)C3COC4c5ccc(OC6OC(CO)C(O)C(O)C6O)c(OC)c5	C32H42O17	698.666	KNApSAcK
(+)-Hydroxypisatin (6aR,11aR)2,6a-Dihydroxy-3-methoxy-8,9-methylenedioxypterocar	COc1cc2OCC3(O)C(Oc4cc5OCOc5cc34)c2cc1O	C17H14O7	330.289	KNApSAcK
(+)-Hygrine Hygrine D-(+)-Hygrine	CN1CCCC1CC(=O)C	C8H15NO	141.211	KNApSAcK
(+)-Indocarbazostatin Indocarbazostatin	CCOC(=O)C1(O)CC2OC1(C)n3c4ccc(O)cc4c5c6C(=O)NC(=O)c6c7c8ccccc8n2c7c35	C28H21N3O7	511.482	KNApSAcK
(+)-Intermedeol 5beta,10alpha-Eudesm-11-en-4-ol	CC(=C)C1CCC2(C)CCCC(C)(O)C2C1	C15H26O	222.366	KNApSAcK
(+)-Iridodial	CC1CCC2C1C(O)OC=C2C	C10H16O2	168.233	KNApSAcK
(+)-Isoalloalantolactone Isoalloalantolactone [3aR-(3aalpha,4aalpha,8abeta,9aalp	CC1=CCCC2(C)CC3OC(=O)C(=C)C3CC12	C15H20O2	232.318	KNApSAcK
(+)-Isoaminobisabolenol a Isoaminobisabolenol a	CC(=C)C(O)CCC(C)(N)C1CCC(=CC1)C	C15H27NO	237.381	KNApSAcK
(+)-Isocaryachine	COc1cc2C3Cc4cc5OCOc5cc4C(Cc2cc1O)N3C	C19H19NO4	325.358	KNApSAcK
(+)-Isocorypalmine	COc1cc2CCN3Cc4c(CC3c2cc1O)ccc(OC)c4OC	C20H23NO4	341.401	KNApSAcK
(+)-Isocupressic acid Isocupressic acid 15-Hydroxy-8(17),13E-labdadien-15-oic ac	C\C(=C/CO)\CCC1C(=C)CCC2C1(C)CCCC2(C)C(=O)O	C20H32O3	320.466	KNApSAcK
(+)-Isoeburnamine	CCC12CCCN3CCc4c(C13)n(C(O)C2)c5ccccc45	C19H24N2O	296.407	KNApSAcK
(+)-Isojaspic acid	CC(=C)CCCC1(C)CCCC2(C)C(Cc3cc(ccc3O)C(=O)O)C(=C)CCC12	C27H38O3	410.589	KNApSAcK
(+)-Isojuvabiol Isojuvabiol	COC(=O)C1=CCC(CC1)C(C)CC(O)CC(C)C	C16H28O3	268.392	KNApSAcK
(+)-Isolariciresinol 2a-O-alpha-L-arabinopyranoside	COc1cc2CC(COC3OCC(O)C(O)C3O)C(CO)C(c4ccc(O)c(OC)c4)c2cc1O	C25H32O10	492.516	KNApSAcK
(+)-Isolarisiresinol 2a-O-beta-D-glucopyranoside	COc1cc2CC(COC3OC(CO)C(O)C(O)C3O)C(CO)C(c4ccc(O)c(OC)c4)c2cc1O	C26H34O11	522.542	KNApSAcK
(+)-Isolarisiresinol 3a-O-beta-D-glucopyranoside	COc1cc2CC(CO)C(COC3OC(CO)C(O)C(O)C3O)C(c4ccc(O)c(OC)c4)c2cc1O	C26H34O11	522.542	KNApSAcK
(+)-Isolaurene	CC1=C(C)C(C)(CC1)c2ccc(C)cc2	C15H20	200.319	KNApSAcK
(+)-Isololiolide Isololiolide	CC1(C)CC(O)CC2(C)OC(=O)C=C12	C11H16O3	196.243	KNApSAcK
(+)-Isomatrine Isomatrine	CC1(CO)CCCC2(C)C(CCc3cocc3)C(=C)CC(O)C12	C20H30O3	318.45	KNApSAcK
(+)-Isomenthol	CC(C)C1CCC(C)CC1O	C10H20O	156.265	KNApSAcK
(+)-Isomenthone	CC(C)C1CCC(C)CC1=O	C10H18O	154.249	KNApSAcK
(+)-Isomintlactone	CC1CCC2=C(C)C(=O)OC2C1	C10H14O2	166.217	KNApSAcK
(+)-Isopanduratin A Isopanduratin A2	COc1cc(O)cc(O)c1C(=O)C2C(CC=C(C)C)C(=CCC2c3ccccc3)C	C26H30O4	406.514	KNApSAcK
(+)-Isopetasol Isopetasol 3alpha-Hydroxy-eremophila-7(11),9-dien-8-one	CC1C(O)CCC2=CC(=O)C(=C(C)C)CC12C	C15H22O2	234.334	KNApSAcK
(+)-Isopiperitenone p-Mentha-1,8-dien-3-one	CC(=C)C1CCC(=CC1=O)C	C10H14O	150.218	KNApSAcK
(+)-Isotazettinol	CN1CC2(O)OCc3cc4OCOc4cc3C25C=CC(O)CC15	C17H19NO5	317.336	KNApSAcK
(+)-Isotelekin Isotelekin	CC12CCC(O)C(=C)C1CC3C(C2)OC(=O)C3=C	C15H20O3	248.317	KNApSAcK
(+)-Isotetrandrine Isotetrandrine Isosinomenin A Isosinomenine A O,O'-Dimethylob	COc1ccc2CC3N(C)CCc4cc(OC)c(OC)c(Oc5cc6C(Cc7cccc(Oc1c2)c7)N(C)CCc6cc5OC)c34	C38H42N2O6	622.75	KNApSAcK
(+)-Isotrilobine Homotrilobin Homotrilobine Isotrilobin N,O-Dimethylcocsoline	COc1ccc2CC3N(C)CCc4cc5Oc6c(OC)cc7CCN(C)C(Cc8ccc(Oc1c2)cc8)c7c6Oc5cc34	C36H36N2O5	576.681	KNApSAcK
(+)-Isovalencenol Isovalencenol	CC1CCC=C2CC\C(=C(\C)/CO)\CC12C	C15H24O	220.35	KNApSAcK
(+)-Ixerin H Ixerin H	CC1C2CC\C(=C/CC\C(=C/C2OC1=O)\COC3OC(CO)C(O)C(O)C3O)\C	C21H32O8	412.474	KNApSAcK
(+)-Ixerin L Ixerin L	CC1C2CC\C(=C/CC\C(=C\C2OC1=O)\CO)\CO	C15H22O4	266.333	KNApSAcK
(+)-Jafrine	CCCCCC(=O)c1cc2c3CCN(C(C)c3[nH]c2cc1OC)C(=O)C	C21H28N2O3	356.459	KNApSAcK
(+)-Juricanolide Juricanolide	OC1OC\C\2=C/C3OC(=O)C(=C)C3CCC14OC4CC2	C15H18O5	278.3	KNApSAcK
(+)-Jurinelloide Jurinelloide	C\C=C(\C)/C(=O)OC1C\C(=C\CC\C(=C\C2OC(=O)C(=C)C12)\CO)\CO	C20H26O6	362.417	KNApSAcK
(+)-Jussiaeiine B Jussiaeiine B	COc1cccc(n1)C2CC(CO)C3CCCCN3C2	C16H24N2O2	276.374	KNApSAcK
(+)-Jussiaeiine C Jussiaeiine C	COc1cccc(n1)C2CC(CO)C3CC(O)CCN3C2	C16H24N2O3	292.373	KNApSAcK
(+)-Jussiaeiine D Jussiaeiine D	COc1cccc(n1)C2CC(CO)C3CCC(O)CN3C2	C16H24N2O3	292.373	KNApSAcK
(+)-Kalafungin Kalafungin Kalamycin NSC 137443 U 19718	CC1OC2CC(=O)OC2C3=C1C(=O)c4c(O)cccc4C3=O	C16H12O6	300.263	KNApSAcK
(+)-Khusitene	CCC1CCC(=C)C2CCC(=CC12)C	C14H22	190.324	KNApSAcK
(+)-Kohatine 5-Hydroxy-(+)-cocsoline Kohatine	COc1c(O)c2CCN(C)C3Cc4ccc(Oc5cc(CC6NCCc7cc8Oc1c(Oc8cc67)c23)ccc5O)cc4	C34H32N2O6	564.628	KNApSAcK
(+)-Kopsinone	COC(=O)N1c2ccccc2C34CCN5CC=CC6(CCC13CC6=O)C45	C21H22N2O3	350.411	KNApSAcK
(+)-Kopsoffine Kopsoffine	CCC12CCCN3CCc4c(C13)n(C(C2)c5ccc6NC78CCC9(CCCN%10CCC7(C9%10)c6c5)CC8C(=O)OC)c%11ccccc4%11	C40H48N4O2	616.835	KNApSAcK
(+)-Kopsoffinol Kopsoffinol	COC(=O)C1CC23CCCN4CCC5(C24)c6cc(ccc6NC15CC3)C7CC8(CCCN9CCc%10c(C89)n7c%11ccccc%10%11)C(C)O	C40H48N4O3	632.834	KNApSAcK
(+)-Kreysigine	COc1cc2CCN(C)C3CCc4cc(OC)c(OC)c(OC)c4c(c1O)c23	C22H27NO5	385.453	KNApSAcK
(+)-Kudtriol Kudtriol Kutdtriol [2R-[2alpha(R),4aalpha,8abeta]]-2-(Decahydro-8a-	CC(O)(CO)C1CCC2(C)CCCC(=C)C2(O)C1	C15H26O3	254.365	KNApSAcK
(+)-Kurasoin A Kurasoin A (S)-3-Hydroxy-4-(4-hydroxyphenyl)-1-phenyl-2-butanone	OC(Cc1ccc(O)cc1)C(=O)Cc2ccccc2	C16H16O3	256.296	KNApSAcK
(+)-Kurasoin B Kurasoin B (S)-3-Hydroxy-4-(1H-indol-3-yl)-1-phenyl-2-butanone	OC(Cc1c[nH]c2ccccc12)C(=O)Cc3ccccc3	C18H17NO2	279.333	KNApSAcK
(+)-Kurramine Kurramine O-Demethyl-1,2-dehydroapateline	CN1CCc2cc(O)c3Oc4cc5CCN=C6Cc7ccc(O)c(Oc8ccc(CC1c2c3Oc4cc56)cc8)c7	C33H28N2O5	532.586	KNApSAcK
(+)-Lactacystin Lactacystin	CC(C)C(O)C1(NC(=O)C(C)C1O)C(=O)SCC(NC(=O)C)C(=O)O	C15H24N2O7S	376.425	KNApSAcK
(+)-Lactonamycin Lactonamycin	COC12CC(=O)OC13C(=O)c4c(O)c5c6CN(C)C(=O)c6c(O)cc5cc4C(=O)C3(CO2)OC7CCC(O)C(C)O7	C28H27NO12	569.513	KNApSAcK
(+)-Lapidilectine B	COC(=O)N1c2ccccc2C34CCN5CC=CC56CCC13C(C6)C(=O)O4	C21H22N2O4	366.41	KNApSAcK
(+)-Lariciresinol 4-methyl ether	COc1ccc(cc1OC)C2OCC(Cc3ccc(O)c(OC)c3)C2CO	C21H26O6	374.428	KNApSAcK
(+)-Lariciresinol 9'-caffeinate	COc1cc(CC2COC(C2COC(=O)\C=C\c3ccc(O)c(O)c3)c4ccc(O)c(OC)c4)ccc1O	C29H30O9	522.543	KNApSAcK
(+)-Lariciresinol 9'-p-coumarate	COc1cc(CC2COC(C2COC(=O)\C=C\c3ccc(O)cc3)c4ccc(O)c(OC)c4)ccc1O	C29H30O8	506.544	KNApSAcK
(+)-Lariciresinol dimethyl ether	COc1ccc(CC2COC(C2CO)c3ccc(OC)c(OC)c3)cc1OC	C22H28O6	388.454	KNApSAcK
(+)-Lariciresinol	COc1cc(CC2COC(C2CO)c3ccc(O)c(OC)c3)ccc1O	C20H24O6	360.401	KNApSAcK
(+)-Laudanidine (S)-Laudanine L-(+)-Laudanidine	COc1ccc(CC2N(C)CCc3cc(OC)c(OC)cc23)cc1O	C20H25NO4	343.417	KNApSAcK
(+)-Laurelliptinhexadecan-1-one	CCCCCCCCCCCCCCCC(=O)N1CCc2cc(OC)c(O)c3c2C1Cc4cc(O)c(OC)cc34	C34H49NO5	551.757	KNApSAcK
(+)-Laurifoline	COc1cc2c(CC3c4c(CC[N+]3(C)C)cc(OC)c(O)c24)cc1O	C20H24NO4	342.409	KNApSAcK
(+)-Lepadin D Lepadin D Lepadine D	CCCC(O)CCCCC1CCCC2NC(C)C(O)CC12	C18H35NO2	297.476	KNApSAcK
(+)-Lepadin F	CCCCC\C=C\C(=O)OC1CC2C(CCCCC(O)CCC)CCCC2NC1C	C26H47NO3	421.656	KNApSAcK
(+)-Lepadin G	CCC\C=C\C=C\C(=O)OC1CC2C(CCCCC(O)CCC)CCCC2NC1C	C26H45NO3	419.64	KNApSAcK
(+)-Limalongine Limalongine	COC1=CCC2(CCC34NCCC23CC(=O)C(=C4OC)OC)C1=O	C18H23NO5	333.379	KNApSAcK
(+)-Limousamine Limalongine	COc1cc2CC3N(C)CC(O)c4ccc(O)c(Oc2cc1OC)c34	C19H21NO5	343.374	KNApSAcK
(+)-Linderatin	CC(C)C1CCC(=CC1c2c(O)cc(O)c(C(=O)CCc3ccccc3)c2O)C	C25H30O4	394.503	KNApSAcK
(+)-Lirioresinol B (+)-Syringaresinol	COc1cc(cc(OC)c1O)C2OCC3C2COC3c4cc(OC)c(O)c(OC)c4	C22H26O8	418.437	KNApSAcK
(+)-Lucidenic acid A 3,11,15-Trioxo-7beta-hydroxy-5alpha-lanost-8-en-24-oic acid	CC(CCC(=O)O)C1CC(=O)C2(C)C3=C(C(=O)CC12C)C4(C)CCC(=O)C(C)(C)C4CC3O	C27H38O6	458.587	KNApSAcK
(+)-Lucidenic acid B 3,11,15-Trioxo-7beta,12beta-dihydroxy-5alpha-lanost-8-en-24	CC(CCC(=O)O)C1CC(=O)C2(C)C3=C(C(=O)C(O)C12C)C4(C)CCC(=O)C(C)(C)C4CC3O	C27H38O7	474.586	KNApSAcK
(+)-Lychnostatin 1 Lychnostatin 1	CC1CCC(=O)C(C)(CC(OC(=O)C(=C)C)C2C(OC(=O)C2=C)C1O)OC(=O)C	C21H28O8	408.442	KNApSAcK
(+)-Lychnostatin 2 Lychnostatin 2	CC1CCC(=O)C(C)(CC(OC(=O)C(=C)C)C2C(C1)OC(=O)C2=C)OC(=O)C	C21H28O7	392.443	KNApSAcK
(+)-Lyoniresinol 3alpha-O-beta-D-glucopyranoside (+)-Lyoniresinol 3alpha-O-beta-	COc1cc(cc(OC)c1O)C2C(COC3OC(CO)C(O)C(O)C3O)C(CO)Cc4cc(OC)c(O)c(OC)c24	C28H38O13	582.594	KNApSAcK
(+)-Lyoniresinol	COc1cc(cc(OC)c1O)C2C(CO)C(CO)Cc3cc(OC)c(O)c(OC)c23	C22H28O8	420.453	KNApSAcK
(+)-m-Menth-6-en-8-ol alpha-Sylveterpineol	CC1=CCCC(C1)C(C)(C)O	C10H18O	154.249	KNApSAcK
(+)-Maackiain 3-Hydroxy-8,9-(methylenedioxy)pterocarpan	Oc1ccc2C3Oc4cc5OCOc5cc4C3COc2c1	C16H12O5	284.263	KNApSAcK
(+)-Maackiain 3-O-glucoside Sophojaponicin	OCC1OC(Oc2ccc3C4Oc5cc6OCOc6cc5C4COc3c2)C(O)C(O)C1O	C22H22O10	446.404	KNApSAcK
(+)-Maackiamine Maackiamine (+)-Norammodendrine	CC(=O)N1CCCC(=C1)C2CCCN2	C11H18N2O	194.273	KNApSAcK
(+)-Maackinine	C\C=C(\C)/C(=O)OC1CCC2(C)C3CC(OC(=O)C)C4C5(O)C(CC24OC13O)C6CN7CC(C)CCC7C(C)(O)C6C(O)C5OC(=O)\C(=C/C)\C	C39H57NO11	715.87	KNApSAcK
(+)-Maaliol Maaliol Maali alcohol	CC1(C)C2CCC3(C)CCCC(C)(O)C3C12	C15H26O	222.366	KNApSAcK
(+)-Macbecin I Macbecin Macbecin I NSC 330499	COC1CC(C)C(OC)C2=CC(=O)C=C(NC(=O)\C(=C\C=C\C(C)C(OC(=O)N)\C(=C\C(C)C1OC)\C)\C)C2=O	C30H42N2O8	558.663	KNApSAcK
(+)-Madindoline A Madindoline A	CCCCC1=C(C)C(=O)C(C)(CN2C3OCCC3(O)c4ccccc24)C1=O	C22H27NO4	369.454	KNApSAcK
(+)-Makassaric acid	CC1=CCC2C(C)(CCC3C(C)(C)CCCC23C)C1Cc4cc(ccc4O)C(=O)O	C27H38O3	410.589	KNApSAcK
(+)-Mannostatin A Mannostatin Mannostatin A	CSC1C(N)C(O)C(O)C1O	C6H13NO3S	179.237	KNApSAcK
(+)-Marmesin Marmesin	CC(C)(O)C1Cc2cc3C=CC(=O)Oc3cc2O1	C14H14O4	246.259	KNApSAcK
(+)-Matairesinol	COc1cc(CC2COC(=O)C2Cc3ccc(O)c(OC)c3)ccc1O	C20H22O6	358.385	KNApSAcK
(+)-Mauiensine	C\C=C/1\CN2C3CC1C4C2CC5(C4O)C3N(C)c6ccccc56	C20H24N2O	308.417	KNApSAcK
(+)-Mecambroline	CN1CCc2cc3OCOc3c4c5cc(O)ccc5CC1c24	C18H17NO3	295.332	KNApSAcK
(+)-Medioresinol Medioresinol	COc1cc(ccc1O)C2OCC3C2COC3c4cc(OC)c(O)c(OC)c4	C21H24O7	388.411	KNApSAcK
(+)-Megacerotonic acid	OC(=O)C1OC(=O)\C(=C\c2ccc(O)cc2)\C1c3ccc(O)c(O)c3	C18H14O7	342.3	KNApSAcK
(+)-Megistophylline I	COC1=C(O)C2=C(N(C)c3ccccc3C2=O)C(CC=C(C)C)(OC)C1=O	C21H23NO5	369.411	KNApSAcK
(+)-Megistophylline II	COC1=C(O)C2=C(N(C)c3ccccc3C2=O)C(C\C=C(/C)\CCC=C(C)C)(OC)C1=O	C26H31NO5	437.528	KNApSAcK
(+)-Megistosarcimine	COc1c2c(nc3occc13)C(=N)CC4CC(C)(C)C(=O)C24OC	C18H20N2O4	328.362	KNApSAcK
(+)-Megistosarconine	COc1c2c(nc3occc13)C(=O)CC4CC(C)(C)C(=O)C24OC	C18H19NO5	329.347	KNApSAcK
(+)-Mehranine Mehranine	CCC12CCC3N(C)c4ccccc4C35CCN(CC6OC16)C25	C20H26N2O	310.433	KNApSAcK
(+)-Melitensin	CC1C2C(O)CC(C)(C=C)C(C2OC1=O)C(=C)CO	C15H22O4	266.333	KNApSAcK
(+)-Melonine 2,11-Cyclo-11,12-secoaspidospermidine	CCC12CCCN3CCC4(CC1)Nc5ccccc5C4C23	C19H26N2	282.423	KNApSAcK
(+)-Menthofuran (R)-(+)-Menthofuran	CC1CCc2c(C)coc2C1	C10H14O	150.218	KNApSAcK
(+)-Menthyl acetate	CC(C)C1CCC(C)CC1OC(=O)C	C12H22O2	198.302	KNApSAcK
(+)-Meranzin hydrate	COc1ccc2C=CC(=O)Oc2c1CC(O)C(C)(C)O	C15H18O5	278.3	KNApSAcK
(+)-Methyl abscisate	COC(=O)\C=C(\C)/C=C/C1(O)C(=CC(=O)CC1(C)C)C	C16H22O4	278.343	KNApSAcK
(+)-Methyl ganoderate E	COC(=O)C(C)CC(=O)CC(C)C1CC(=O)C2(C)C3=C(C(=O)CC12C)C4(C)CCC(=O)C(C)(C)C4CC3=O	C31H42O7	526.661	KNApSAcK
(+)-Methyl ganolucidate A	COC(=O)C(C)CC(=O)CC(C)C1CC(O)C2(C)C3=C(C(=O)CC12C)C4(C)CCC(=O)C(C)(C)C4CC3	C31H46O6	514.693	KNApSAcK
(+)-Methyl ganolucidate B	COC(=O)C(C)CC(=O)CC(C)C1CC(O)C2(C)C3=C(C(=O)CC12C)C4(C)CCC(O)C(C)(C)C4CC3	C31H48O6	516.709	KNApSAcK
(+)-Methyl lucidenic acid F	COC(=O)CCC(C)C1CC(=O)C2(C)C3=C(C(=O)CC12C)C4(C)CCC(=O)C(C)(C)C4CC3=O	C28H38O6	470.598	KNApSAcK
(+)-Methylcocsoline (+)-O-Methylcocsoline O-Methylcocsoline	COc1ccc2CC3NCCc4cc5Oc6c(OC)cc7CCN(C)C(Cc8ccc(Oc1c2)cc8)c7c6Oc5cc34	C35H34N2O5	562.655	KNApSAcK
(+)-Milnamide A (3S)-(+)-Milnamide A (3S)-Milnamide A Milnamide A	CC(C)C(\C=C(/C)\C(=O)O)N(C)C(=O)C(NC(=O)C1N(C)Cc2c(c3ccccc3n2C)C1(C)C)C(C)(C)C	C31H46N4O4	538.721	KNApSAcK
(+)-Minovincinine 20R-20-Hydroxy-(-)-vincadifformine Alkaloid V3	COC(=O)C1=C2Nc3ccccc3C24CCN5CCCC(C1)(C(C)O)C45	C21H26N2O3	354.443	KNApSAcK
(+)-Mitoridine	C\C=C/1\CN2C3CC45C(C2CC1C3C4=O)N(C)c6c(O)cccc56	C20H22N2O2	322.401	KNApSAcK
(+)-Monorden D Monorden D	CC1C\C=C\CC\C=C\C(=O)Cc2c(Cl)c(O)cc(O)c2C(=O)O1	C18H19ClO5	350.793	KNApSAcK
(+)-Montafrusin B Montafrusin B	CC(=CC(=O)OC1C(O)\C(=C\C(O)C\C(=C\C2OC(=O)C(=C)C12)\C)\C)C	C20H26O6	362.417	KNApSAcK
(+)-Mopanol Mopanan-4alpha-ol (+)-Mopanol A	OC1C2OCc3c(O)c(O)ccc3C2Oc4cc(O)ccc14	C16H14O6	302.279	KNApSAcK
(+)-Mucronulatol (R)-Mucronulatol	COc1ccc(C2COc3cc(O)ccc3C2)c(OC)c1O	C17H18O5	302.322	KNApSAcK
(+)-Murrayazoline Curryangin Curryangine Mahanimbidin Mahanimbidine Murrayazolin	Cc1cc2c3ccccc3n4c2c5C6CC(C)(CCC6C4(C)C)Oc15	C23H25NO	331.451	KNApSAcK
(+)-Mycotrienin II Ansatrienin B Antibiotic T 23II Mycotrienin II SDZ 115-962	COC1CC(=O)Nc2cc(O)cc(CC\C=C(/C)\C(O)C(C)C(C\C=C/C=C/C=C/1)OC(=O)C(C)NC(=O)C3CCCCC3)c2O	C36H50N2O8	638.791	KNApSAcK
(+)-Myrioxazine A	C1CC2CCCN3COCC(C1)C23	C11H19NO	181.275	KNApSAcK
(+)-Myristinin A Myristinin A trans-(+)-1-[3-[3,4-Dihydro-7-hydroxy-2-(4-hydroxy	CCCCCCCCCCCC(=O)c1c(O)cc(O)c(C2CC(Oc3cc(O)ccc23)c4ccc(O)cc4)c1O	C33H40O7	548.666	KNApSAcK
(+)-Myrtenol Darwinol	CC1(C)C2CC=C(CO)C1C2	C10H16O	152.233	KNApSAcK
(+)-N(6)-Acetoxyaphelandrine (+)-N6-Acetoxyaphelandrine N6-Acetoxyaphelandrine	CC(=O)ON1CCCCN2CCCNC(=O)CC(NCCC1)c3ccc4OC(C(C2=O)c4c3)c5ccc(O)cc5	C30H38N4O6	550.646	KNApSAcK
(+)-N(6)-Hydroxyaphelandrine (+)-N6-Hydroxyaphelandrine N6-Hydroxyaphelandrine	ON1CCCCN2CCCNC(=O)CC(NCCC1)c3ccc4OC(C(C2=O)c4c3)c5ccc(O)cc5	C28H36N4O5	508.609	KNApSAcK
(+)-N,N-Bisnoraromoline (+)-Bisnoraromoline 2,2'-Didemethylaromoline N,N'-Bisnor	COc1cc2CCNC3Cc4ccc(Oc5cc(CC6NCCc7cc(OC)c(Oc(c1O)c23)cc67)ccc5O)cc4	C34H34N2O6	566.644	KNApSAcK
(+)-N-(Dihydro-5'-hydroxy-6-oxospiro[4,8-dioxatricyclo[5.1.0.03,5]octane-2,2'(3'	CCCCCCC(C)CC(C)\C=C\C(=O)NC1CC2(OC1O)C3OC3C(=O)C4OC24	C23H35NO6	421.527	KNApSAcK
(+)-N-Acetylparthenolidine N-Acetylparthenolidine	CC(=O)NCC1C2CC\C(=C/CCC3(C)OC3C2OC1=O)\C	C17H25NO4	307.385	KNApSAcK
(+)-N-Deoxymilitarinone A	CCC(C)CC(C)\C=C(/C)\C=C\C=C\C(=O)C1=C(O)C(=CNC1=O)C2(O)CCC(O)CC2	C26H37NO5	443.576	KNApSAcK
(+)-N-Formylnornantenine N-Formylnornantenine	COc1cc2CCN(C=O)C3Cc4cc5OCOc5cc4c(c1OC)c23	C20H19NO5	353.369	KNApSAcK
(+)-N-Methyl-7-O-demethylpeinamine 1'-Epiatherospermoline	COc1cc2CCN(C)C3Cc4ccc(O)c(Oc5ccc(CC6N(C)CCc7cc(OC)c(Oc(c1O)c23)cc67)cc5)c4	C36H38N2O6	594.697	KNApSAcK
(+)-N-Methylaloperine	CN1CCCC2=CC3CC(CN4CCCCC34)C12	C16H26N2	246.391	KNApSAcK
(+)-N-Methylcoclaurine (+)-(S)-N-Methylcoclaurine	COc1cc2CCN(C)C(Cc3ccc(O)cc3)c2cc1O	C18H21NO3	299.364	KNApSAcK
(+)-N-Methylcorydine N-Methylcorydine	COc1cc2CC[N+](C)(C)C3Cc4ccc(OC)c(OC)c4c(c1O)c23	C21H26NO4	356.435	KNApSAcK
(+)-N-Methyllaurotetanine 2-O-Methylboldine Lauroscholtzine N-Methyllaurotetanin	COc1cc2c(CC3N(C)CCc4cc(OC)c(OC)c2c34)cc1O	C20H23NO4	341.401	KNApSAcK
(+)-Nafuredin FT 0554 Nafuredin	CCC(C)\C=C\C=C(/C)\CC(C)\C=C\C=C\C1OC(=O)C(O)C2OC12C	C22H32O4	360.487	KNApSAcK
(+)-Naringenin	Oc1ccc(cc1)C2CC(=O)c3c(O)cc(O)cc3O2	C15H12O5	272.253	KNApSAcK
(+)-Neoacrimarine-F	COc1cc(O)c2C(=O)c3ccc(O)c(OC4C(O)C(C)(C)Oc5ccc6C=CC(=O)Oc6c45)c3N(C)c2c1	C29H25NO9	531.51	KNApSAcK
(+)-Neoacrimarine-G	COc1cc(O)c2C(=O)c3cccc(OC4C(O)C(C)(C)Oc5ccc6C=CC(=O)Oc6c45)c3N(C)c2c1	C29H25NO8	515.511	KNApSAcK
(+)-Neoacrimarine-H	CN1c2c(OC3C(O)C(C)(C)Oc4ccc5C=CC(=O)Oc5c34)cccc2C(=O)c6c(O)cc7OC(C)(C)C=Cc7c16	C33H29NO8	567.585	KNApSAcK
(+)-Neoisopulegol	CC1CCC(C(O)C1)C(=C)C	C10H18O	154.249	KNApSAcK
(+)-Neomatatabiol	CC1CCC2C(C)COC(O)C12	C10H18O2	170.249	KNApSAcK
(+)-Neoolivil	COc1cc(ccc1O)C2OC(C(CO)C2CO)c3ccc(O)c(OC)c3	C20H24O7	376.4	KNApSAcK
(+)-Neopyrrolomycin Antibiotic MI 424-38F1	Oc1cc(Cl)c(Cl)c(Cl)c1n2ccc(Cl)c2Cl	C10H4Cl5NO	331.41	KNApSAcK
(+)-Neothramycin A Neothramycin A	COc1cc2C(=O)N3C(O)CCC3C=Nc2cc1O	C13H14N2O4	262.261	KNApSAcK
(+)-Neotrifaradiene	CC1CC=C2C(C)C(C)(CCC12C)C=C	C15H24	204.351	KNApSAcK
(+)-Nepapakistamine A	CNC(C)C1=CCC2C3CCC4C(OC(=O)C)C(NC(=O)\C(=C\C)\C)C(CC4(C)C3CCC12C)OC(=O)C	C31H48N2O5	528.723	KNApSAcK
(+)-Nootkatone Nootkanone Nootkatone 4betaH,5alpha-Eremophila-1(10),11-dien-2-on	CC1CC(=O)C=C2CCC(CC12C)C(=C)C	C15H22O	218.335	KNApSAcK
(+)-Norajmalidine	CCC1C2CC3C4Nc5ccccc5C46CC(C2C6=O)N3C1O	C19H22N2O2	310.39	KNApSAcK
(+)-Norajmaline	CCC1C2CC3C4Nc5ccccc5C46CC(C2C6O)N3C1O	C19H24N2O2	312.406	KNApSAcK
(+)-Norcularidine	COc1cc2CC3NCCc4ccc(O)c(Oc2cc1OC)c34	C18H19NO4	313.348	KNApSAcK
(+)-Nordicentrine Nordicentrine	COc1cc2CC3NCCc4cc5OCOc5c(c2cc1OC)c34	C19H19NO4	325.358	KNApSAcK
(+)-Norglaucine Norglaucin Norglaucine O,O-Dimethyllaurelliptine	COc1cc2CC3NCCc4cc(OC)c(OC)c(c2cc1OC)c34	C20H23NO4	341.401	KNApSAcK
(+)-Nornantenine N-Nornantenine Nornantenine	COc1cc2CCNC3Cc4cc5OCOc5cc4c(c1OC)c23	C19H19NO4	325.358	KNApSAcK
(+)-Nornicotine	C1CNC(C1)c2cccnc2	C9H12N2	148.205	KNApSAcK
(+)-Noroconovine	COc1ccc2CC3NCCc4c(OC)c(OC)c(OC)c(c34)c2c1O	C20H23NO5	357.4	KNApSAcK
(+)-Norpenduline 2-Demethylpenduline	COc1cc2CCN(C)C3Cc4ccc(Oc5cc(CC6NCCc7cc(OC)c(OC)c(Oc1cc23)c67)ccc5O)cc4	C36H38N2O6	594.697	KNApSAcK
(+)-Norseredamine Norseredamine	COc1cccc2c1NC3C4CC5C6C(CC23C6O)N4C/C/5=C/C	C20H24N2O2	324.417	KNApSAcK
(+)-Norstephasubine	COc1ccc2CC3NCCc4cc(OC)c(Oc5c(O)c(OC)cc6ccnc(Cc7ccc(Oc1c2)cc7)c56)cc34	C35H32N2O6	576.638	KNApSAcK
(+)-Nuciferal (E)-Nuciferal (E,S)-(+)-Nuciferal	CC(CC\C=C(/C)\C=O)c1ccc(C)cc1	C15H20O	216.319	KNApSAcK
(+)-Nyasol	Oc1ccc(\C=C/C(C=C)c2ccc(O)cc2)cc1	C17H16O2	252.308	KNApSAcK
(+)-O,O-Dimethylcocsulinine O,O-Dimethylcocsulinine	COc1ccc2CC3N(C)CCc4cc(OC)c5Oc6c(Oc5c34)c(OC)cc7CCN(C)C(Cc8ccc(Oc1c2)cc8)c67	C37H38N2O6	606.707	KNApSAcK
(+)-O-Methylcaryachine (+)-Eschscholtzidine	COc1cc2CC3N(C)C(Cc4cc5OCOc5cc34)c2cc1OC	C20H21NO4	339.385	KNApSAcK
(+)-O-Methylcularicine	COc1ccc2CCN(C)C3Cc4cc5OCOc5cc4Oc1c23	C19H19NO4	325.358	KNApSAcK
(+)-O-Methyldihydrobotrydial	COC1OCC2(C)CC(C)(C)C3C(CC(C)C1C23O)OC(=O)C	C18H30O5	326.428	KNApSAcK
(+)-O-Methylhamatine O-Methylhamatine	COc1cc(OC)c(c2CC(C)NC(C)c12)c3c(C)cc(OC)c4c(OC)cccc34	C26H31NO4	421.529	KNApSAcK
(+)-O-methylisoeburnamine	CCC12CCCN3CCc4c(C13)n(C(C2)OC)c5ccccc45	C20H26N2O	310.433	KNApSAcK
(+)-O-Methylthalicberine O-Methylthalicberine	COc1ccc2CC3N(C)CCc4cc(OC)c(OC)c(Oc5cc6CCN(C)C(Cc7ccc(Oc1c2)cc7)c6cc5OC)c34	C38H42N2O6	622.75	KNApSAcK
(+)-Obafluorin Obafluorin	Oc1cccc(C(=O)NC2C(Cc3ccc(cc3)[N+](=O)[O-])OC2=O)c1O	C17H14N2O7	358.302	KNApSAcK
(+)-Occidentalol Occidentalol 10alpha-Eudesma-1,3-dien-11-ol [2R-(2alpha,4abeta,	CC1=CC=CC2(C)CCC(CC12)C(C)(C)O	C15H24O	220.35	KNApSAcK
(+)-Ochracenomicin A Ochracenomicin A	CC1CC(=O)C2(O)C3=C(C=CC2(O)C1)C(=O)c4c(O)cccc4C3=O	C19H16O6	340.327	KNApSAcK
(+)-Ophiocarpinone	COc1ccc2C(=O)C3N(CCc4cc5OCOc5cc34)Cc2c1OC	C20H19NO5	353.369	KNApSAcK
(+)-Oplopanone	CC(C)C1CCC(C)(O)C2CCC(C12)C(=O)C	C15H26O2	238.366	KNApSAcK
(+)-Orthosporin Orthosporin	CC(O)CC1=Cc2cc(O)cc(O)c2C(=O)O1	C12H12O5	236.221	KNApSAcK
(+)-Oxoglaucine	COc1ccc2CC3N(C)CCc4cc(OC)c5Oc6cc7CCN(C)C(Cc8ccc(Oc1c2)cc8)c7cc6Oc5c34	C36H36N2O5	576.681	KNApSAcK
(+)-Oxopropaline D G 324D Oxopropaline D	Cc1cnc(C(=O)C(O)CO)c2[nH]c3ccccc3c12	C15H14N2O3	270.283	KNApSAcK
(+)-Oxoturkiyenine	CN1C=Cc2cc3OCOc3cc2C(=O)C14C(=O)Oc5c6OCOc6ccc45	C20H13NO7	379.32	KNApSAcK
(+)-Oxyfrullanolide Oxyfrullanolide	CC12CCCC(=C)C1(O)C3OC(=O)C(=C)C3CC2	C15H20O3	248.317	KNApSAcK
(+)-Oxyglutinosone Oxyglutinosone [3R-(3alpha,4beta,4abeta,6alpha)]-4,4a,5,6,7,8	CC1C(O)C(=O)C=C2CCC(CC12O)C(=C)C	C14H20O3	236.307	KNApSAcK
(+)-Pacifigorgia-1(6),10-diene	CC1CCC2=C(CCC2C)C1C=C(C)C	C15H24	204.351	KNApSAcK
(+)-Pacifigorgiol	CC1CCC2(O)C1CCC(C)C2C=C(C)C	C15H26O	222.366	KNApSAcK
(+)-Paeoniflorigenone Paeoniflorigenone	CC12CC(=O)C3CC1(O)OC(O2)C3COC(=O)c4ccccc4	C17H18O6	318.321	KNApSAcK
(+)-Paeonilactone B Paeonilactone-B	CC1(O)CC2OC(=O)C(=C)C2CC1=O	C10H12O4	196.2	KNApSAcK
(+)-Paeonilactone C Paeonilactone C	CC1(O)CC2OC(=O)C(COC(=O)c3ccccc3)C2CC1=O	C17H18O6	318.321	KNApSAcK
(+)-Pallescensone Pallescensone	CC1(C)CCCC(=C)C1CC(=O)c2cocc2	C15H20O2	232.318	KNApSAcK
(+)-Pallidinine	COC1=CC23CCN(C)C(Cc4cc(O)c(OC)cc24)C3CC1=O	C19H23NO4	329.39	KNApSAcK
(+)-Palodesagretin I Palodesagretin I	COc1cc(O)ccc1C2C3C(CC(=CC3c4c(OC)c(O)c5OC(=O)C=Cc5c24)C)c6ccc(O)c(O)c6	C31H28O8	528.549	KNApSAcK
(+)-Palodesagretin II Palodesagretin II	COc1cc(O)ccc1C2CC(=CC3C2C(c4ccc(O)c(O)c4)c5c6C=CC(=O)Oc6c(O)c(OC)c35)C	C31H28O8	528.549	KNApSAcK
(+)-Pamamycin 607 Pamamycin 607	CCCC(CC1CCC(O1)C(C)C2OC(=O)C(C)C3CCC(CC(CCC)OC(=O)C(C)C4CCC(O4)C2C)O3)N(C)C	C35H61NO7	607.861	KNApSAcK
(+)-Panacosmine	CC(=O)N1CCCC(=C1)C2C3CC4CN(C3CC=C)C5CCCC4N25	C21H31N3O	341.49	KNApSAcK
(+)-Panduratin A Panduratin A	COc1cc(O)c(C(=O)C2C(CC=C(C)C)C(=CCC2c3ccccc3)C)c(O)c1	C26H30O4	406.514	KNApSAcK
(+)-Paramicholide Paramicholide	CC1C2C(C\C(=C\C(O)CC3(C)OC3C2OC1=O)\C)OC(=O)C	C17H24O6	324.369	KNApSAcK
(+)-Parviflorol	OC1C(c2ccc(O)cc2)c3c(O)cc(O)cc3C(=O)c4c(O)cc(O)cc14	C21H16O7	380.348	KNApSAcK
(+)-Parvinine	COc1ccc(CC2N(C)CCc3cc(OC)c(OC)cc23)cc1	C20H25NO3	327.417	KNApSAcK
(+)-Paxillarine B	CC(C1CCC2C3CCC4C(OC(=O)C)C(CCC4(C)C3CC(O)C12C)N(C)C(=O)c5ccccc5)N(C)C	C33H50N2O4	538.761	KNApSAcK
(+)-Pendilinine N2-Demethyl-O,O-dimethylpendulinine O,O-Dimethyl-2'-N-demethylpe	COc1ccc2CC3N(C)CCc4cc(OC)c5Oc6c(Oc5c34)c(OC)cc7CCNC(Cc8ccc(Oc1c2)cc8)c67	C36H36N2O6	592.681	KNApSAcK
(+)-Perakine Raucaffrine	CC1C(C=O)C2CC3N1C4CC5(C(OC(=O)C)C24)C3=Nc6ccccc56	C21H22N2O3	350.411	KNApSAcK
(+)-Petasol Petasol Sencathenone	CC1C(O)CCC2=CC(=O)C(CC12C)C(=C)C	C15H22O2	234.334	KNApSAcK
(+)-Phaseic acid	C\C(=C\C(=O)O)\C=C\C1(O)C2(C)COC1(C)CC(=O)C2	C15H20O5	280.316	KNApSAcK
(+)-Phillygenin	COc1ccc(cc1OC)C2OCC3C2COC3c4ccc(O)c(OC)c4	C21H24O6	372.412	KNApSAcK
(+)-Phillyrin	COc1ccc(cc1OC)C2OCC3C2COC3c4ccc(OC5OC(CO)C(O)C(O)C5O)c(OC)c4	C27H34O11	534.552	KNApSAcK
(+)-Phomactin C Phomactin C Sch 47918	CC1CC=C2C(C=O)C1(C)CC\C(=C\CCC3(C)OC3C2=O)\C	C20H28O3	316.435	KNApSAcK
(+)-Phomactin E Phomactin E	CC1CC=C2C(=O)C3OC3(C)CC\C=C(/C)\CCC1(C)C2(C)O	C20H30O3	318.45	KNApSAcK
(+)-Phomactin F Phomactin F	CC1CC=C2C(=O)C3OC3(C)CCC4OC4(C)CCC1(C)C2(C)O	C20H30O4	334.45	KNApSAcK
(+)-Phomactin G Phomactin G	CC1CCC2=C3COC2(O)C4OC4(C)CC\C=C(\C)/CCC13C	C20H30O3	318.45	KNApSAcK
(+)-Phomopsidin Fungicidal TUF 95F47 Phomopsidin TUF 95F47	C\C=C(/C)\C1C(\C=C\C=C\C(=O)O)C2C(C)CCC(O)C2C=C1C	C21H30O3	330.461	KNApSAcK
(+)-Phyllanthostatin 2 Phyllanthostatin 2	CC1COC2(CC1OC(=O)\C=C\c3ccccc3)OC4CC(CCC4C25CO5)C(=O)OC6OC(CO)C(O)C(OC(=O)C)C6OC7OC(C)C(O)C(OC(=O)C)C7O	C40H52O18	820.83	KNApSAcK
(+)-Phyllanthostatin 3 Phyllanthostatin 3	CC1COC2(CC1OC(=O)\C=C\c3ccccc3)OC4CC(CCC4C2(O)CO)C(=O)OC5OC(C)C(O)C(OC(=O)C)C5OC6OC(C)C(O)C(OC(=O)C)C6O	C40H54O18	822.846	KNApSAcK
(+)-Picriside B Costunolide 15-beta-D-glucopyranoside Picriside B	C\C\1=C/CC\C(=C\C2OC(=O)C(=C)C2CC1)\COC3OC(CO)C(O)C(O)C3O	C21H30O8	410.458	KNApSAcK
(+)-Picriside C Picriside C	C\C\1=C/CC(OC2OC(CO)C(O)C(O)C2O)\C(=C\C3OC(=O)C(=C)C3CC1)\C	C21H30O8	410.458	KNApSAcK
(+)-Pimaric acid	CC1(CCC2C(=C1)CCC3C2(C)CCCC3(C)C(=O)O)C=C	C20H30O2	302.451	KNApSAcK
(+)-Pinocarvone	CC1(C)C2CC1C(=C)C(=O)C2	C10H14O	150.218	KNApSAcK
(+)-Pinoresinol 4-O-(6''-O-galloyl)-beta-D-glucopyranoside	COc1cc(ccc1O)C2OCC3C2COC3c4ccc(OC5OC(COC(=O)c6cc(O)c(O)c(O)c6)C(O)C(O)C5O)c(OC)c4	C33H36O15	672.63	KNApSAcK
(+)-Pinoresinol di-O-beta-D-glucopyranoside	COc1cc(ccc1OC2OC(CO)C(O)C(O)C2O)C3OCC4C3COC4c5ccc(OC6OC(CO)C(O)C(O)C6O)c(OC)c5	C32H42O16	682.666	KNApSAcK
(+)-Pinoresinol monomethyl ether O-beta-D-glucopyranoside	COc1ccc(cc1OC)C2OCC3C2COC3c4ccc(OC)c(OC5OC(CO)C(O)C(O)C5O)c4	C27H34O11	534.552	KNApSAcK
(+)-Pinoresinolin	COc1cc(OC2OCC3C2COC3c4ccc(O)c(OC)c4)ccc1O	C20H22O7	374.384	KNApSAcK
(+)-Piperazinomycin Piperazinomycin	Oc1ccc2CC3CNC(CN3)Cc4ccc(Oc1c2)cc4	C18H20N2O2	296.364	KNApSAcK
(+)-Piperitol	COc1cc(ccc1O)C2OCC3C2COC3c4ccc5OCOc5c4	C20H20O6	356.369	KNApSAcK
(+)-Piperitone	CC(C)C1CCC(=CC1=O)C	C10H16O	152.233	KNApSAcK
(+)-Pisatin 6a-Hydroxy-3-methoxy-8,9-methylenedioxypterocarpan	COc1ccc2C3Oc4cc5OCOc5cc4C3(O)COc2c1	C17H14O6	314.289	KNApSAcK
(+)-Platydesmine Platydesmine	COc1c2CC(Oc2nc3ccccc13)C(C)(C)O	C15H17NO3	259.3	KNApSAcK
(+)-Plicamine Plicamine	COC1CC2N(C)C(=O)C3N(CCc4ccc(O)cc4)C(=O)c5cc6OCOc6cc5C23C=C1	C26H26N2O6	462.494	KNApSAcK
(+)-Plicane	COC1CC2N(C)C(=O)C3N=Cc4cc5OCOc5cc4C23C=C1	C18H18N2O4	326.347	KNApSAcK
(+)-Plumosol	C\C(=C\COC(=O)C)\CCC1C(C)(O)CCC2C(C)(CO)CCCC12C	C22H38O4	366.535	KNApSAcK
(+)-Porothramycin B Antibiotic BMY 28121B BMY 28121B Porothramycin B	COC1Nc2c(OC)cccc2C(=O)N3C=C(CC13)\C=C\C(=O)N(C)C	C19H23N3O4	357.404	KNApSAcK
(+)-Prezizaene	CC1CCC2C(C)(C)C(=C)C3CCC12C3	C15H24	204.351	KNApSAcK
(+)-Pseudomonic acid C Pseudomonic acid C	CC(O)C(C)\C=C\CC1COC(C\C(=C\C(=O)OCCCCCCCCC(=O)O)\C)C(O)C1O	C26H44O8	484.623	KNApSAcK
(+)-Psymberin Irciniastatin A	COC(CC(=C)C)C(O)C(=O)NC(OC)C1CC(O)C(C)(C)C(CC(O)C(C)C2Cc3c(C)c(O)cc(O)c3C(=O)O2)O1	C31H47NO11	609.705	KNApSAcK
(+)-Pteridic acid A Pteridic acid A	CCC1C=CC2(OC1C)OC(C(C)\C=C\C=C\C(=O)O)C(C)C(O)C2C	C21H32O5	364.476	KNApSAcK
(+)-Pterocarpol Eudesm-4(14)-ene-2a,11-diol [2R-(2alpha,4aalpha,6beta,8abeta)]-d	CC(C)(O)C1CCC2(C)CC(O)CC(=C)C2C1	C15H26O2	238.366	KNApSAcK
(+)-Pulegone (+)-(R)-Pulegone	CC1CCC(=C(C)C)C(=O)C1	C10H16O	152.233	KNApSAcK
(+)-Purpeline Purpeline	COc1cccc2c1N(C)C3C4CC5C6C(CC23C6=O)N4C/C/5=C/C	C21H24N2O2	336.427	KNApSAcK
(+)-Purpurin	CC(=O)OC1C2C(Oc3ccc4C(=O)CC(Oc4c23)c5ccccc5)OC1(C)C	C23H22O6	394.417	KNApSAcK
(+)-Pyridomacrolidin Pyridomacrolidin	CCC(CO)\C=C(/C)\C=C\C(=O)C1=C(O)C(=C2C3C(ON2C1=O)C(O)CC(=O)OC(C)CCC3=O)c4ccc(O)cc4	C31H35NO10	581.61	KNApSAcK
(+)-Pyripyropene A FO 1289A Pyripyropene A	CC(=O)OCC1(C)C(CCC2(C)C1CC(OC(=O)C)C3(C)OC4=C(C(O)C23)C(=O)OC(=C4)c5cccnc5)OC(=O)C	C31H37NO10	583.626	KNApSAcK
(+)-Pyripyropene F GERI-BP 001B Pyripyropene F	CCC(=O)OC1CCC2(C)C(CCC3(C)OC4=C(CC23)C(=O)OC(=C4)c5cccnc5)C1(C)C	C28H35NO5	465.581	KNApSAcK
(+)-Pyripyropene G Pyripyropene G	CC(=O)OC1CCC2(C)C(CCC3(C)OC4=C(C(O)C23)C(=O)OC(=C4)c5cccnc5)C1(C)C	C27H33NO6	467.554	KNApSAcK
(+)-Pyripyropene H Pyripyropene H	CCC(=O)OC1CCC2(C)C(CCC3(C)OC4=C(C(O)C23)C(=O)OC(=C4)c5cccnc5)C1(C)C	C28H35NO6	481.581	KNApSAcK
(+)-Pyripyropene I Pyripyropene I	CCC(=O)OCC1(C)C(CCC2(C)C1CC(OC(=O)CC)C3(C)OC4=C(C(O)C23)C(=O)OC(=C4)c5cccnc5)OC(=O)CC	C34H43NO10	625.706	KNApSAcK
(+)-Pyripyropene J Pyripyropene J	CCC(=O)OC1CCC2(C)C(CC(OC(=O)CC)C3(C)OC4=C(C(O)C23)C(=O)OC(=C4)c5cccnc5)C1(C)COC(=O)C	C33H41NO10	611.679	KNApSAcK
(+)-Pyripyropene K Pyripyropene K	CCC(=O)OCC1(C)C(CCC2(C)C1CC(OC(=O)C)C3(C)OC4=C(C(O)C23)C(=O)OC(=C4)c5cccnc5)OC(=O)CC	C33H41NO10	611.679	KNApSAcK
(+)-Pyripyropene L Pyripyropene L	CCC(=O)OCC1(C)C(CCC2(C)C1CC(OC(=O)CC)C3(C)OC4=C(C(O)C23)C(=O)OC(=C4)c5cccnc5)OC(=O)C	C33H41NO10	611.679	KNApSAcK
(+)-Quebrachidine Quebrachidine	COC(=O)C12C3CC4(C(Nc5ccccc45)C6CC1\C(=C/C)\CN36)C2O	C21H24N2O3	352.427	KNApSAcK
(+)-Quercitol	OC1CC(O)C(O)C(O)C1O	C6H12O5	164.156	KNApSAcK
(+)-Quinolactacin A2 Quinolactacin A2 Quinolactacine A2	CCC(C)C1NC(=O)C2=C1N(C)c3ccccc3C2=O	C16H18N2O2	270.326	KNApSAcK
(+)-Radulanin J Radulanin J	COc1cc(CCc2ccccc2)cc3OCC4(C)CC4c13	C20H22O2	294.387	KNApSAcK
(+)-Raucaffrinoline Raucaffrinoline	CC1C(CO)C2CC3N1C4CC5(C(OC(=O)C)C24)C3=Nc6ccccc56	C21H24N2O3	352.427	KNApSAcK
(+)-Rauflexine	COc1ccc2c(c1)N(C)C3C4CC5C6C(CC23C6=O)N4C/C/5=C/C	C21H24N2O2	336.427	KNApSAcK
(+)-Rauflorine	C\C=C/1\CN2C3CC1C4C2CC5(C3Nc6ccccc56)C4=O	C19H20N2O	292.375	KNApSAcK
(+)-Reblastatin Lebstatin Reblastatin	COC1CC(C)Cc2cc(NC(=O)\C(=C\CCC(OC)C(OC(=O)N)\C(=C\C(C)C1O)\C)\C)cc(O)c2OC	C29H44N2O8	548.668	KNApSAcK
(+)-Reflexine	COc1ccc2c(c1)N(C)C3C4CC5C6C(CC23C6O)N4C/C/5=C/C	C21H26N2O2	338.443	KNApSAcK
(+)-Restricticin Restricticin Ro 09-1470 Ro 90-1470 Scopularin	CCC\C=C\C=C\C=C(/C)\C1OCC(C)C(OC)C1OC(=O)CN	C19H31NO4	337.454	KNApSAcK
(+)-Reticuline Reticuline	COc1ccc(CC2N(C)CCc3cc(OC)c(O)cc23)cc1O	C19H23NO4	329.39	KNApSAcK
(+)-Reynosin Reinosin Reynosin	CC12CCC3C(OC(=O)C3=C)C1C(=C)CCC2O	C15H20O3	248.317	KNApSAcK
(+)-Rhododendrol	CC(O)CCc1ccc(O)cc1	C10H14O2	166.217	KNApSAcK
(+)-Ribaliprenylene	CN1C2=C(CC(O)C(C)(C)O2)C(=O)c3cccc(OCC=C(C)C)c13	C20H25NO4	343.417	KNApSAcK
(+)-Ricciocarpin A Ricciocarpin A	CC1(C)CCCC2C1CC(OC2=O)c3cocc3	C15H20O3	248.317	KNApSAcK
(+)-Ricciocarpin B Ricciocarpin B	CC1(C)CCCC2C1CC(OC2=O)C3=CC(=O)OC3	C15H20O4	264.317	KNApSAcK
(+)-Ridentin B Ridentin B	CC12CCC3C(OC(=O)C3=C)C1C(=C)C(O)CC2O	C15H20O4	264.317	KNApSAcK
(+)-Rishirilide B Rishirilide B	CC(C)CCC1(O)c2cc3c(O)cccc3cc2C(=O)C(C)C1(O)C(=O)O	C21H24O6	372.412	KNApSAcK
(+)-Ro 09-1544 Ro 09-1544	COC1C(C)COC(C1O)\C(=C\C=C\C=C\C=C\C)\C	C17H26O3	278.387	KNApSAcK
(+)-Ro 09-1545 Ro 09-1545	CCC\C=C\C=C\C=C(\C)/C1OCC(C)C(OC)C1OC(=O)CNCCC(=O)C	C23H37NO5	407.544	KNApSAcK
(+)-Ro 09-1547 Ro 09-1547	CCC\C=C\C=C\C=C(/C)\C1OCC(C)C(O)C1O	C16H26O3	266.376	KNApSAcK
(+)-Ro 09-1549 Ro 09-1549	CCC\C=C\C=C\C=C(/C)\C1OCCC(OC)C1O	C16H26O3	266.376	KNApSAcK
(+)-Roridin L-2 Roridin L 2 [4beta(2Z,4E)]-4-[6-[2-(2,5-Dihydro-5-oxo-3-furanyl)	CC(O)C(OCCC1=CC(=O)OC1)\C=C\C=C\C(=O)OC2CC3OC4C=C(C)CCC4(CO)C2(C)C35CO5	C29H38O9	530.607	KNApSAcK
(+)-Rosifoliol Rosifoliol [2R-(2alpha,4abeta,8beta)]-2,3,4,4a,5,6,7,8-octahydro-	CC1CCCC2(C)CCC(C=C12)C(C)(C)O	C15H26O	222.366	KNApSAcK
(+)-Rotundifolone	CC(=C1CCC2(C)OC2C1=O)C	C10H14O2	166.217	KNApSAcK
(+)-Rubiginone A2 Rubiginone A2 Fujianmycin B	COc1cccc2C(=O)c3c(ccc4C(O)C(C)CC(=O)c34)C(=O)c12	C20H16O5	336.338	KNApSAcK
(+)-Rubiginone B2 Rubiginone B2	COc1cccc2C(=O)c3c(ccc4CC(C)CC(=O)c34)C(=O)c12	C20H16O4	320.339	KNApSAcK
(+)-S-Carvone D-Limonene d-(+)-Limonene	CC(=C)C1CCC(=CC1)C	C10H16	136.234	KNApSAcK
(+)-Sabinene	CC(C)C12CCC(=C)C1C2	C10H16	136.234	KNApSAcK
(+)-Sabinone	CC(C)C12CC1C(=C)C(=O)C2	C10H14O	150.218	KNApSAcK
(+)-Salsolidine	COc1cc2CCNC(C)c2cc1OC	C12H17NO2	207.269	KNApSAcK
(+)-Sandvicene Sandvicene	CC1(C)CCC2=CCC(C)(CCC12)C=C	C15H24	204.351	KNApSAcK
(+)-Sandwicolidine	CCC1C(OC)C2CC3C4N(C)c5ccccc5C46CC(C2C6O)N13	C21H28N2O2	340.459	KNApSAcK
(+)-Sarcocapnidine Sarcocapnidine	COc1ccc2CC3N(C)CCc4ccc(OC)c(Oc2c1O)c34	C19H21NO4	327.374	KNApSAcK
(+)-Sarcocapnine Sarcocapnine	COc1ccc2CC3N(C)CCc4ccc(OC)c(Oc2c1OC)c34	C20H23NO4	341.401	KNApSAcK
(+)-Sarodesmine (3',4'5'-trimethoxybenzoyl)-13-oxylupanine Sarodesmine	COc1cc(cc(OC)c1OC)C(=O)OC2CCN3CC4CC(CN5C4CCCC5=O)C3C2	C25H34N2O6	458.547	KNApSAcK
(+)-Sattabacin Sattabacin	CC(C)CC(=O)C(O)Cc1ccccc1	C13H18O2	206.281	KNApSAcK
(+)-Sattazolin Sattazolin Sattazoline	CC(C)CC(=O)C(O)Cc1c[nH]c2ccccc12	C15H19NO2	245.317	KNApSAcK
(+)-Scandine Scandine Sandine	COC(=O)C12CC3(C=C)C=CCN4CCC1(C34)c5ccccc5NC2=O	C21H22N2O3	350.411	KNApSAcK
(+)-Sceletium A4	COc1ccc(cc1OC)C23CCN(C)C2c4cccnc4CC3	C20H24N2O2	324.417	KNApSAcK
(+)-Schizogaline	COc1ccc2C3CCN4CC=CC56CCC3(C45)N(C(=O)C6)c2c1	C20H22N2O2	322.401	KNApSAcK
(+)-Schizozygine Schizozygin	O=C1CC23CCC45C(CCN(CC=C2)C34)c6cc7OCOc7cc6N15	C20H20N2O3	336.384	KNApSAcK
(+)-Schkuhridin Schkuhridin B	CC(=C)C1C(O)C2C(CC1(CO)C=C)OC(=O)C2=C	C15H20O4	264.317	KNApSAcK
(+)-Schkuhriodin Schkuhriodin	CC(C)C(=O)OC\C\1=C\CC\C(=C\C(O)C2C(C1)OC(=O)C2=C)\C	C19H26O5	334.407	KNApSAcK
(+)-Sclerosporal	CC(C)C1CC=C(C=O)C2CCC(=CC12)C	C15H22O	218.335	KNApSAcK
(+)-Scyphostatin F 10463a Scyphostatin	CCC(C)\C=C(/C)\CC(C)CC(C)\C=C\C=C\C=C\C(=O)NC(CO)CC1(O)C2OC2C=CC1=O	C29H43NO5	485.655	KNApSAcK
(+)-Secoisolariciresinol diglucoside	COc1cc(CC(COC2OC(CO)C(O)C(O)C2O)C(COC3OC(CO)C(O)C(O)C3O)Cc4ccc(O)c(OC)c4)ccc1O	C32H46O16	686.698	KNApSAcK
(+)-Secoisolariciresinol	COc1cc(CC(CO)C(CO)Cc2ccc(O)c(OC)c2)ccc1O	C20H26O6	362.417	KNApSAcK
(+)-Semecarpine	COc1c2ccoc2nc3c4c(OC(C)C4(C)C)ccc13	C17H17NO3	283.322	KNApSAcK
(+)-Seredamine Seredamine	COc1cccc2c1N(C)C3C4CC5C6C(CC23C6O)N4C/C/5=C/C	C21H26N2O2	338.443	KNApSAcK
(+)-Sesamolin	C1Oc2ccc(OC3OCC4C3COC4c5ccc6OCOc6c5)cc2O1	C20H18O7	370.353	KNApSAcK
(+)-Siddiquamine	COc1ccc2Cc3nccc4cc5Oc6c(OC)c(O)c7CCN(C)C(Cc8ccc(Oc1c2)cc8)c7c6Oc5cc34	C35H30N2O6	574.622	KNApSAcK
(+)-Siddiquine	COc1c(O)c2CCN(C)C3Cc4ccc(Oc5cc(Cc6nccc7cc8Oc1c(Oc8cc67)c23)ccc5O)cc4	C34H28N2O6	560.596	KNApSAcK
(+)-Sinactine	COc1cc2CCN3Cc4c(CC3c2cc1OC)ccc5OCOc45	C20H21NO4	339.385	KNApSAcK
(+)-SNF 4435D SNF 4435D	COC1=C(C)C(=O)C(=C(O1)C2CC3(CO2)C4C(=CC(=CC4(C)C3c5ccc(cc5)[N+](=O)[O-])C)C)C	C28H31NO6	477.549	KNApSAcK
(+)-Sophorbenzamine	O=C1N2CC3CCCN4CCCC(C34)C2=CC=C1Cc5ccccc5	C22H26N2O	334.455	KNApSAcK
(+)-Sophorol 7,2'-Dihydroxy-4',5'-methylenedioxyisoflavanone	Oc1ccc2C(=O)C(COc2c1)c3cc4OCOc4cc3O	C16H12O6	300.263	KNApSAcK
(+)-Sphydrofuran	CC1(O)CC2(CO1)OCC(O)C2O	C8H14O5	190.194	KNApSAcK
(+)-Spirofornabuxine	CCC1CC23CC2C4=CC5(CCC(NC)C5(C)C)C=CC=C4C3(C)CC1=O	C25H35NO	365.551	KNApSAcK
(+)-Spiropachysine	CC(C1C(O)CC2C3CCC4CC5(CCC4(C)C3CCC12C)N(C)Cc6ccccc56)N(C)C	C31H48N2O	464.726	KNApSAcK
(+)-Stachyflin SQ-02-S5 Stachyflin	CC1CCC2C(C)(C)C(O)CCC23Oc4c(CC13C)c(O)cc5C(=O)NCc45	C23H31NO4	385.497	KNApSAcK
(+)-Staurosporine Staurosporine AM-2282 Antibiotic 230 Antibiotic AM 2282 CGP 39	CNC1CC2OC(C)(C1OC)n3c4ccccc4c5c6CNC(=O)c6c7c8ccccc8n2c7c35	C28H26N4O3	466.531	KNApSAcK
(+)-Stemonolone (4aS-trans)-4a,7,8,8a-Tetrahydro-8a-hydroxy-4a-methyl-8-methylen	CC(C)C1=CCC2(C)C=CCC(=C)C2(O)C1=O	C15H20O2	232.318	KNApSAcK
(+)-Stepharine Stepharine	COc1cc2CCNC3CC4(C=CC(=O)C=C4)c(c1OC)c23	C18H19NO3	297.348	KNApSAcK
(+)-Stephasubine	COc1ccc2CC3N(C)CCc4cc(OC)c(Oc5c(O)c(OC)cc6ccnc(Cc7ccc(Oc1c2)cc7)c56)cc34	C36H34N2O6	590.665	KNApSAcK
(+)-Stephibaberine Stephibaberine	COc1ccc2CC3N(C)CCc4cc(OC)c(Oc5c(OC)c(O)cc6CCN(C)C(Cc7ccc(Oc1c2)cc7)c56)cc34	C37H40N2O6	608.723	KNApSAcK
(+)-Sterculinine I	CCCCOC(=O)CC(NC(=O)C1=CC(=O)Nc2ccccc12)C(=O)O	C18H20N2O6	360.361	KNApSAcK
(+)-Sterculinine II	COC(=O)CC(NC(=O)C1=CC(=O)Nc2ccccc12)C(=O)O	C15H14N2O6	318.281	KNApSAcK
(+)-Strempeliopidine Strempeliopidine	CCC12CCCN3CCC4(C(CC1)Nc5ccc(cc45)C6Cn7c8C9N(CCCC69CC)CCc8c%10ccccc7%10)C23	C38H48N4	560.815	KNApSAcK
(+)-Strigol Strigol	CC1=CC(O\C=C\2/C3CC4=C(C3OC2=O)C(C)(C)CCC4O)OC1=O	C19H22O6	346.374	KNApSAcK
(+)-Stylopine	C1Oc2cc3CCN4Cc5c(CC4c3cc2O1)ccc6OCOc56	C19H17NO4	323.343	KNApSAcK
(+)-Subersic acid	C\C(=C/Cc1cc(ccc1O)C(=O)O)\CCC2=C(C)CCC3C(C)(C)CCCC23C	C27H38O3	410.589	KNApSAcK
(+)-Tamariscene	CC1CCC23C1CCC(C)C2C3C(=C)C	C15H24	204.351	KNApSAcK
(+)-Taraxafolin B	OC(OC(=O)\C=C\c1ccc(O)c(O)c1)C(=O)O	C11H10O7	254.193	KNApSAcK
(+)-Taxiresinol	COc1cc(CC2COC(C2CO)c3ccc(O)c(O)c3)ccc1O	C19H22O6	346.374	KNApSAcK
(+)-Tecleanatalensine A (+)-Tecleoxine	COc1cc2nc3occc3c(OC)c2cc1OCC4OC4(C)C	C18H19NO5	329.347	KNApSAcK
(+)-Tenuicausine	CCC12CC(c3cc4c(NC5=C(CC6(CC)C=CCN7CCC45C67)C(=O)OC)cc3OC)n8c9C1N(CCc9c%10ccccc8%10)CC=C2	C41H46N4O3	642.829	KNApSAcK
(+)-Tephropurpurin	COc1cc2OC3OC(C)(C)C(OC(=O)C)C3c2c(O)c1C(=O)\C=C\c4ccccc4	C24H24O7	424.443	KNApSAcK
(+)-Tephrorin A Tephrorin A	COc1ccc2C(=O)CC(Oc2c1C3C(O)OC(C)(C)C3OC(=O)C)c4ccccc4	C24H26O7	426.459	KNApSAcK
(+)-Tephrorin B Tephrorin B	CC1(C)OCC(C1OC(=O)\C=C\c2ccccc2)c3c(O)ccc4C(=O)CC(Oc34)c5ccccc5	C30H28O6	484.54	KNApSAcK
(+)-Tephrosone 3-Phenyl-1-[(3S,3aS,8aR)-2,3,3a,8a-tetrahydro-3,4-dihydroxy-2,2-d	CC1(C)OC2Oc3ccc(C(=O)\C=C\c4ccccc4)c(O)c3C2C1O	C21H20O5	352.38	KNApSAcK
(+)-Terpendole A FO 2546A Terpendole A	CC1(C)OC1C2OC3C(OC4CCC5(C)C(O)(CCC6Cc7c([nH]c8ccccc78)C56C)C49OC39)C(C)(C)O2	C32H41NO6	535.671	KNApSAcK
(+)-Terrecyclic acid A Terrecyclic acid A	CC1(C)CC23C(CC(=O)C2=C)C1CCC3C(=O)O	C15H20O3	248.317	KNApSAcK
(+)-Tetrahydropalmatine	COc1cc2CCN3Cc4c(CC3c2cc1OC)ccc(OC)c4OC	C21H25NO4	355.427	KNApSAcK
(+)-Tetrandrine Tetrandrine	COc1ccc2CC3N(C)CCc4cc(OC)c(OC)c(Oc5cc6C(Cc7ccc(Oc1c2)cc7)N(C)CCc6cc5OC)c34	C38H42N2O6	622.75	KNApSAcK
(+)-Teucriumlactone Allodolicholactone Teucriumlactone	CC1CCC2C1COC(=O)C2=C	C10H14O2	166.217	KNApSAcK
(+)-Thalictricavine	COc1ccc2C(C)C3N(CCc4cc5OCOc5cc34)Cc2c1OC	C21H23NO4	353.412	KNApSAcK
(+)-Thaligrisine Thaligrisine	COc1cc2CCN(C)C(Cc3ccc(Oc4cc(CC5N(C)CCc6cc(OC)c(O)cc56)ccc4OC)cc3)c2cc1O	C37H42N2O6	610.739	KNApSAcK
(+)-Thalrugosine Thalrugosine	COc1cc2CCN(C)C3Cc4ccc(Oc5cccc(CC6N(C)CCc7cc(OC)c(Oc(c1O)c23)cc67)c5)c(OC)c4	C37H40N2O6	608.723	KNApSAcK
(+)-Theonellin Theonellin	CC(C)\C=C\C=C(/C)\C1CCC(=CC1)C	C15H24	204.351	KNApSAcK
(+)-Thiazinotrienomycin E Thiazinotrienomycin E	COC1CC(=O)Nc2cc3NC(=O)CSc3c(CC\C=C(/C)\C(O)C(C)C(C\C=C/C=C\C=C\1)OC(=O)C(C)NC(=O)C4CCCCC4)c2O	C38H51N3O8S	709.892	KNApSAcK
(+)-Tirotundifolin A Tirotundifolin A	CC1OC1(C)C(=O)OC2CC3(C)C(O)CCC(=C)C3C4OC(=O)C(=C)C24	C20H26O6	362.417	KNApSAcK
(+)-Tirotundifolin C Tirotundifolin C (3aR,4R,5aR,6R,9aS,9bR)-[partial]- 2,3,3a,	CC(O)C(=C)C(=O)OC1CC2(C)C(O)CC=C(C)C2C3OC(=O)C(=C)C13	C20H26O6	362.417	KNApSAcK
(+)-Tirotundifolin E Tirotundifolin E Dodecahydro-6-hydroxy-5a,9-dimethyl-3-meth	CC(O)C(C)(O)C(=O)OC1CC2(C)C(O)CCC(C)C2C3OC(=O)C(=C)C13	C20H30O7	382.448	KNApSAcK
(+)-Toddanol	COc1cc2OC(=O)C=Cc2c(OC)c1CC(O)C(=C)C	C16H18O5	290.311	KNApSAcK
(+)-Trachyspic acid Trachyspic acid	CCCCCCCCCC1=COC2(CC(C(=O)O)C(CC(=O)O)(O2)C(=O)O)C1=O	C20H28O9	412.431	KNApSAcK
(+)-trans-4'-Acetyl-3'-tigloylkhellactone	C\C=C(/C)\C(=O)OC1C(OC(=O)C)c2c(OC1(C)C)ccc3C=CC(=O)Oc23	C21H22O7	386.395	KNApSAcK
(+)-trans-Dauca-4(11),8-diene	CC(=C1CCC2(C)CC=C(C)CCC12)C	C15H24	204.351	KNApSAcK
(+)-trans-Deacetoxyerioaustralasine hydrate	CN1C(=O)C2=C(OC(C)(C)C3CCC(C)(O)C(O)C23)c4ccccc14	C20H25NO4	343.417	KNApSAcK
(+)-trans-Deacetoxyerioaustralasine	CN1C(=O)C2=C(OC(C)(C)C3CCC4(C)OC4C23)c5ccccc15	C20H23NO3	325.402	KNApSAcK
(+)-trans-Erioaustralasine hydrate	CC(=O)OCN1C(=O)C2=C(OC(C)(C)C3CCC(C)(O)C(O)C23)c4ccccc14	C22H27NO6	401.453	KNApSAcK
(+)-trans-Erioaustralasine	CC(=O)OCN1C(=O)C2=C(OC(C)(C)C3CCC4(C)OC4C23)c5ccccc15	C22H25NO5	383.438	KNApSAcK
(+)-trans-Ozic acid	C\C(=C/CC1C(=C)CCC2C1(C)CCCC2(C)C(=O)O)\C=C	C20H30O2	302.451	KNApSAcK
(+)-trans-Sabinene hydrate	CC(C)C12CCC(C)(O)C1C2	C10H18O	154.249	KNApSAcK
(+)-trans-Sabinol	CC(C)C12CC(O)C(=C)C1C2	C10H16O	152.233	KNApSAcK
(+)-Trehazolin A 70615 Trehalostatin Trehazolin Trehazoline	OCC1OC(NC2=NC3C(O2)C(O)C(O)C3(O)CO)C(O)C(O)C1O	C13H22N2O10	366.321	KNApSAcK
(+)-Tremetriol	CC1=C2CC(C)(C)C(O)C2CC3(C)CC(O)C13O	C15H24O3	252.349	KNApSAcK
(+)-Tricordatine Tricordatine	CN1CCc2cc3Oc4c(O)cc5CCN(C)C6Cc7ccc(Oc8cc(CC1c2cc3Oc4c56)ccc8O)cc7	C34H32N2O5	548.628	KNApSAcK
(+)-Trienomycin A Trienomycin A	COC1CC(=O)Nc2cc(O)cc(CC\C=C(/C)\C(O)C(C)C(C\C=C/C=C/C=C/1)OC(=O)C(C)NC(=O)C3CCCCC3)c2	C36H50N2O7	622.791	KNApSAcK
(+)-Triptofoldin B TWHR 2 Triptofoldin B Triptofordin B [3R-(3alpha,5beta,5aalph	CC1(C)OC23C(O)C1CC(OC(=O)c4ccccc4)C2(C)C(CCC3(C)O)OC(=O)c5ccccc5	C29H34O7	494.576	KNApSAcK
(+)-Triptofordin A Triptofordin A [3R-(3alpha,5beta,5aalpha,6alpha,9beta,9aalpha	CC1(C)OC23CC1CC(OC(=O)\C=C\c4ccccc4)C2(C)C(CCC3(C)O)OC(=O)c5ccccc5	C31H36O6	504.614	KNApSAcK
(+)-Tubelactomicin A Tubelactomicin A	CC1CCC\C=C(/C(O)C(C)\C=C\C=C\C2C(=CC3C(O)C(C)CCC3C2(C)C(=O)O1)C)\C(=O)O	C29H42O6	486.64	KNApSAcK
(+)-Tuberiferine Tuberiferin Tubiferin [3aS-(3aalpha,5abeta,9alpha,9aalpha,9bbet	CC1C2CCC3(C)C=CC(=O)C(C)C3=C2OC1=O	C15H18O3	246.302	KNApSAcK
(+)-Tubipofuran Tubipofuran	CC1=CC=CC2(C)Cc3occ(C)c3CC12	C15H18O	214.303	KNApSAcK
(+)-Tubocurarine	COc1cc2CC[N+](C)(C)C3Cc4ccc(O)c(Oc5cc6C(Cc7ccc(Oc(c1O)c23)cc7)N(C)CCc6cc5OC)c4	C37H41N2O6	609.731	KNApSAcK
(+)-Tulipalin B	OC1COC(=O)C1=C	C5H6O3	114.099	KNApSAcK
(+)-UCS 1025A UCS 1025A	CC1C=CC2CCCCC2C1C(=O)C3C4OC(=O)C5CCN(C3=O)C45O	C20H25NO5	359.416	KNApSAcK
(+)-UK-2A Antibiotic UK 2A UK 2A	COc1ccnc(C(=O)NC2COC(=O)C(Cc3ccccc3)C(OC(=O)C(C)C)C(C)OC2=O)c1O	C26H30N2O9	514.524	KNApSAcK
(+)-Umbellifolide Umbellifolide [3aR-(3aalpha,6alpha,7aalpha)]-Tetrahydro-6-meth	CC(=O)CCCC1(C)CC2OC(=O)C(=C)C2CC1=O	C15H20O4	264.317	KNApSAcK
(+)-Usararotenoid A (6aR,12aS)-12a-Hydroxy-2,3,8,9-bis(methylenedioxy)rotenone	OC12C(COc3cc4OCOc4cc13)Oc5c6OCOc6ccc5C2=O	C18H12O8	356.283	KNApSAcK
(+)-Usararotenoid B	COc1ccc2C(=O)C3(O)C(COc4cc5OCOc5cc34)Oc2c1OC	C19H16O8	372.326	KNApSAcK
(+)-Valencenol Valencenol	CC(C)C1(O)CCC2=CCCC(C)C2(C)C1	C15H26O	222.366	KNApSAcK
(+)-Valerianol Kusenol Kusunol Valerianol	CC1CCC=C2CCC(CC12C)C(C)(C)O	C15H26O	222.366	KNApSAcK
(+)-Validoxylamine G Validoxylamine G	OCC1=CC(NC2CC(O)(CO)C(O)C(O)C2O)C(O)C(O)C1O	C14H25NO9	351.35	KNApSAcK
(+)-Veraguensin	COc1ccc(cc1OC)C2OC(C(C)C2C)c3ccc(OC)c(OC)c3	C22H28O5	372.455	KNApSAcK
(+)-Verrucine A Verrucine A	NC(=O)CCC1N2C(=O)c3ccccc3N=C2C(Cc4ccccc4)NC1=O	C21H20N4O3	376.409	KNApSAcK
(+)-Vestitol (3S)-Vestitol (3S)-3,4-Dihydro-3-(2-hydroxy-4-methoxyphenyl)-2H-1-b	COc1ccc(C2COc3cc(O)ccc3C2)c(O)c1	C16H16O4	272.296	KNApSAcK
(+)-Vincadifformine 5beta,12alpha,19beta-Vincadifformine	CCC12CCCN3CCC4(C13)C(=C(C2)C(=O)OC)Nc5ccccc45	C21H26N2O2	338.443	KNApSAcK
(+)-Vincaminine Vincareine	COC(=O)C1(O)CC2(CCCN3CCc4c(C23)n1c5ccccc45)C(=O)C	C21H24N2O4	368.426	KNApSAcK
(+)-Vincinine	COC(=O)C1(O)CC2(CCCN3CCc4c(C23)n1c5cc(OC)ccc45)C(=O)C	C22H26N2O5	398.452	KNApSAcK
(+)-Vitisifuran A	Oc1ccc(cc1)C2Oc3cc(O)cc4C(C(c5ccc(O)cc5)c6c(O)cc(O)cc6C2c34)c7cc(\C=C\c8cc(O)cc9oc(c%10ccc(O)cc%10)c(c%11cc(O)cc(O)c%11)c89)ccc7O	C56H40O12	904.91	KNApSAcK
(+)-Vitrenal	CC1CCC2C(C2(C)C)C13CCC(=C3)C=O	C15H22O	218.335	KNApSAcK
(+)-Vomalidine	CCC1C2CC3C4N(C)c5c(OC)cccc5C46CC(C2C6=O)N3C1O	C21H26N2O3	354.443	KNApSAcK
(+)-Wikstromol (+)-Nortrachelogenin	COc1cc(CC2COC(=O)C2(O)Cc3ccc(O)c(OC)c3)ccc1O	C20H22O7	374.384	KNApSAcK
(+)-Yatakemycin Yatakemycin	COc1cc2[nH]c(cc2cc1O)C(=O)N3CC4CC45C3=CC(=O)c6[nH]c(cc56)C(=O)N7CCc8c7c(O)c(OC)c9[nH]c(cc89)C(=O)SC	C35H29N5O8S	679.698	KNApSAcK
(+)-Yingzhosu A Yingzhaosu A	CC1CCC2CC1OOC2(C)\C=C\C(O)C(C)(C)O	C15H26O4	270.365	KNApSAcK
(+)-Zempoalin D Zempoalin D	CC(C)C(=O)OC1C2C(OC(=O)C2=C)C3OC(OC(=O)C)C4(CO4)C1C3(C)C=C	C21H26O8	406.426	KNApSAcK
(+)-Zeylenol	OC1C=CC(OC(=O)c2ccccc2)C(O)C1(O)COC(=O)c3ccccc3	C21H20O7	384.379	KNApSAcK
(+)-Zinaflavin B Zinaflavin B	C\C=C(/C)\C(=O)OC1C2OC(=O)C(=C)C2C3OC(=O)C(=C)C3C1(C)C=C	C20H22O6	358.385	KNApSAcK
(+)-Zinaflavin C Zinaflavin C	CC(C)CC(=O)OC1C2OC(=O)C(=C)C2C3OC(=O)C(=C)C3C1(C)C4CO4	C20H24O7	376.4	KNApSAcK
(+)-Zippelianine Zippelianine 2-O-Demethyl-(+)-stephodeline	COC1=C(OC)C(=O)CC23CCN(C)C(Cc4cc(O)c(OC)cc24)C13	C20H25NO5	359.416	KNApSAcK
(+)-Zippeline 8-Demethoxy-(+)-stephodeline Zippeline	COC1=CC2C3Cc4cc(OC)c(OC)cc4C2(CCN3C)CC1=O	C20H25NO4	343.417	KNApSAcK
(+-)-(E)-Nuciferol (+-)-Nuciferol	CC(CC\C=C(/C)\CO)c1ccc(C)cc1	C15H22O	218.335	KNApSAcK
(+-)-1,8-Epoxy-p-menthan-3-one 3-Oxo-1,8-cineole	CC1(C)OC2(C)CCC1C(=O)C2	C10H16O2	168.233	KNApSAcK
(+-)-5-(1-Methylethyl)-2-(2-methylpropyl)-2-cyclohexen-1-one	CC(C)CC1=CCC(CC1=O)C(C)C	C13H22O	194.313	KNApSAcK
(+-)-5-Deoxykievitone	CC(=CCc1c(O)ccc2C(=O)C(COc12)c3ccc(O)cc3O)C	C20H20O5	340.37	KNApSAcK
(+-)-Ancistrofuran Ancistrofuran	CC1(C)CCCC2(C)OC(CC12)c3cocc3	C15H22O2	234.334	KNApSAcK
(+-)-Asarinol A	CC1=CC(O)C2C(C1=O)C2(C)C	C10H14O2	166.217	KNApSAcK
(+-)-Demethylgrossamide	COc1cc(\C=C\C(=O)NCCc2ccc(O)cc2)cc3C(C(Oc13)c4ccc(O)c(O)c4)C(=O)NCCc5ccc(O)cc5	C35H34N2O8	610.653	KNApSAcK
(+-)-Griffonianone D 4'-Methoxy-7-((2E)-6,7-dihydroxy-3,7-dimethyl-2-octaenyloxy	COc1ccc(cc1)C2=COc3cc(OC\C=C(/C)\CCC(O)C(C)(C)O)ccc3C2=O	C26H30O6	438.513	KNApSAcK
(+-)-Grossamide	COc1cc(ccc1O)C2Oc3c(OC)cc(\C=C\C(=O)NCCc4ccc(O)cc4)cc3C2C(=O)NCCc5ccc(O)cc5	C36H36N2O8	624.68	KNApSAcK
(+-)-Methyenomycin A	CC12OC1(C)C(=O)C(=C)C2C(=O)O	C9H10O4	182.173	KNApSAcK
(+-)-Nicolaioidesin B Nicolaioidesin B	COc1cc(O)c(C(=O)C2CC=C(C)C(CC=C(C)C)C2c3ccccc3)c(O)c1	C26H30O4	406.514	KNApSAcK
(+-)-Nicolaioidesin C Nicolaioidesin C	COc1cc(O)c(C(=O)C2CC=C(CCC=C(C)C)CC2c3ccccc3)c(O)c1	C26H30O4	406.514	KNApSAcK
(+-)-p-Menth-6-en-3-one	CC(C)C1CC=C(C)CC1=O	C10H16O	152.233	KNApSAcK
(+-)-Perrillic acid	CC(=C)C1CCC(=CC1)C(=O)O	C10H14O2	166.217	KNApSAcK
(+-)-Pinol	CC1=CCC2CC1OC2(C)C	C10H16O	152.233	KNApSAcK
(+-)-Strigol acetate	CC(=O)OC1CCC(C)(C)C2=C1CC3C2OC(=O)/C/3=C/OC4OC(=O)C(=C4)C	C21H24O7	388.411	KNApSAcK
(+-)-UCE6	CC(O)CC(=O)Cc1cc(O)cc2cc3C(=O)c4cc(O)c(C)c(O)c4C(=O)c3c(O)c12	C24H20O8	436.411	KNApSAcK
(+-)-Umbellulone	CC(C)C12CC1C(=CC2=O)C	C10H14O	150.218	KNApSAcK
(+_-)-4-methylene-2,5-dioxo-3-Pyrrolidinepropanoic acid Isohematinic acid	OC(=O)CCC1C(=O)NC(=O)C1=C	C8H9NO4	183.161	KNApSAcK
(+_-)-7-Hydroxy-6-linalycoumarin	CC(=CCCC(C)(C=C)c1cc2C=CC(=O)Oc2cc1O)C	C19H22O3	298.376	KNApSAcK
(+_-)-Altenuene 2',3',4',5'-Tetrahydro-3,3',4'-trihydroxy-5-methoxy-6'-methyldib	COc1cc(O)c2C(=O)OC3(C)CC(O)C(O)C=C3c2c1	C15H16O6	292.284	KNApSAcK
(+_-)-Altenuic acid II	COc1cc(O)c2C(=O)OC3(CC(=O)OC3(C)CC(=O)O)c2c1	C15H14O8	322.267	KNApSAcK
(+_-)-ar-Todomatuic acid ar-Todomatuic acid (R)-4-(1,5-Dimethyl-3-oxohexyl)benzo	CC(C)CC(=O)CC(C)c1ccc(cc1)C(=O)O	C15H20O3	248.317	KNApSAcK
(+_-)-Dioncophyllacine A Dioncophyllacine A	COc1cccc2c(c(C)cc(OC)c12)c3ccc4c(OC)c(C)nc(C)c4c3OC	C26H27NO4	417.497	KNApSAcK
(+_-)-Epiuleine	CCC1C2CCN(C)C1c3c([nH]c4ccccc34)C2=C	C18H22N2	266.381	KNApSAcK
(+_-)-Isocostic acid Isocostic acid cis-1,2,3,4,4a,5,6,7-Octahydro-4a,8-dimethyl	CC1=C2CC(CCC2(C)CCC1)C(=C)C(=O)O	C15H22O2	234.334	KNApSAcK
(+_-)-Norpurpeline Norpurpeline N-Demethylpurpeline	COc1cccc2c1NC3C4CC5C6C(CC23C6=O)N4C/C/5=C/C	C20H22N2O2	322.401	KNApSAcK
(+_-)-Tangutorine Tangutorine	OCC1=CC2CCC3N(CCc4c3[nH]c5ccccc45)C2CC1	C20H24N2O	308.417	KNApSAcK
(+_-)-trans-3-(2,4,5-Trimethoxyphenyl)-4-[(E)-2,4,5-trimethoxystyryl]-cyclohexen	COc1cc(OC)c(\C=C\C2CCC=CC2c3cc(OC)c(OC)cc3OC)cc1OC	C26H32O6	440.529	KNApSAcK
(+__)-3,4-Dihydrolinaresine	COc1ccc(C(=O)C2=NCCc3cc4OCOc4cc23)c(O)c1OC	C19H17NO6	355.341	KNApSAcK
(-)-(1R)-8-Hydroxy-4-p-menthen-3-one	CC1CC=C(C(=O)C1)C(C)(C)O	C10H16O2	168.233	KNApSAcK
(-)-(1R,2S)-Cispentacin (-)-Cispentacin Antibiotic FR 109615 Cispentacin FR 1096	NC1CCCC1C(=O)O	C6H11NO2	129.157	KNApSAcK
(-)-(2R)-8-Geranylpinostrobin	COc1cc(O)c2C(=O)CC(Oc2c1C\C=C(/C)\CCC=C(C)C)c3ccccc3	C26H30O4	406.514	KNApSAcK
(-)-(3S,4R,6S)-3-(3',4'-Methylenedioxy-alpha-hydroxybenzyl)-4-(3'',4''-dimethoxy	COc1ccc(CC2COC(=O)C2C(O)c3ccc4OCOc4c3)cc1OC	C21H22O7	386.395	KNApSAcK
(-)-(alpha)-Stylopine methiodide	C[N+]12CCc3cc4OCOc4cc3C1Cc5ccc6OCOc6c5C2	C20H20NO4	338.377	KNApSAcK
(-)-(aS,9S,9'S)-Alnusdiol (-)-Alnusdiol Alnusdiol	OC1CCc2ccc(O)c(c2)c3cc(CCC(O)C1)ccc3O	C19H22O4	314.376	KNApSAcK
(-)-(cis-4'-alpha-L-Rhamnosyloxy-3'-methoxycinnamoyl)epilupinine	COc1cc(\C=C/C(=O)OCC2CCCN3CCCCC23)ccc1OC4OC(C)C(O)C(O)C4O	C26H37NO8	491.574	KNApSAcK
(-)-(E)-Lanceol	C\C(=C/CCC(=C)C1CCC(=CC1)C)\CO	C15H24O	220.35	KNApSAcK
(-)-(R)-2'-Methoxydihydroartemidin	CCC(CC1=Cc2ccccc2C(=O)O1)OC	C14H16O3	232.275	KNApSAcK
(-)-(trans-4'-Hydroxycinnamoyl)lupinine Lupinyl trans-p-coumarate	Oc1ccc(\C=C\C(=O)OCC2CCCN3CCCCC23)cc1	C19H25NO3	315.407	KNApSAcK
(-)-(Z)-Volkendousin	C\C=C\1/C(=O)CC2C3CC=C4C(O)C(O)CCC4(C)C3CCC12C	C21H30O3	330.461	KNApSAcK
(-)-1,2,3,4,4a,13b-Hexahydro-3,9,11,13-tetrahydroxy-anthra[2,3-b]benzofuran-7,12	OC1CCC2C(C1)Oc3cc4C(=O)c5cc(O)cc(O)c5C(=O)c4c(O)c23	C20H16O7	368.337	KNApSAcK
(-)-10-Demethyldiscretine (-)-O10-Demethyldiscretine 10-Demethyldiscretine	COc1cc2CC3N(CCc4cc(O)c(OC)cc34)Cc2cc1O	C19H21NO4	327.374	KNApSAcK
(-)-10-epi-5beta,11-Dihydroxyeudesmane [2R-(2alpha,4abeta,8alpha,8aalpha)]-Decah	CC1CCCC2(C)CCC(CC12O)C(C)(C)O	C15H28O2	240.382	KNApSAcK
(-)-10-Methoxyperakine	COc1ccc2N=C3C4CC5C(C=O)C(C)N4C6CC3(C(OC(=O)C)C56)c2c1	C22H24N2O4	380.437	KNApSAcK
(-)-10-Methoxyvincamedine N-oxide	COC(=O)C12C3CC4C5N(C)c6ccc(OC)cc6C5(CC1N4(=O)C/C/3=C/C)C2OC(=O)C	C25H30N2O6	454.515	KNApSAcK
(-)-10-Methoxyvincamedine	COC(=O)C12C3CC4(C(C5CC1\C(=C/C)\CN35)N(C)c6ccc(OC)cc46)C2OC(=O)C	C25H30N2O5	438.516	KNApSAcK
(-)-11,12-Dimethoxy-N-methoxycarbonyl-kopsinaline	COC(=O)N1c2c(OC)c(OC)ccc2C34CCN5CCCC6(CCC13C(O)(C6)C(=O)OC)C45	C25H32N2O7	472.531	KNApSAcK
(-)-11,12-Methylenedioxy-kopsinaline Kopsinine H N-Decarbomethoxykopsamine	COC(=O)C1(O)CC23CCCN4CCC5(C24)c6ccc7OCOc7c6NC15CC3	C22H26N2O5	398.452	KNApSAcK
(-)-11,13-Dehydroeriolin	CC12CCC3OC3(C)CC4OC(=O)C(=C)C4CC1O2	C15H20O4	264.317	KNApSAcK
(-)-11-Methoxy-17-epivincamajine	COC(=O)C12C3CC4(C1O)C(C5CC2\C(=C/C)\CN35)N(C)c6cc(OC)ccc46	C23H28N2O4	396.479	KNApSAcK
(-)-11-Methoxyeburnamonine	CCC12CCCN3CCc4c(C13)n(C(=O)C2)c5cc(OC)ccc45	C20H24N2O2	324.417	KNApSAcK
(-)-11-Methoxyvincamedine	COC(=O)C12C3CC4(C(C5CC1\C(=C/C)\CN35)N(C)c6cc(OC)ccc46)C2OC(=O)C	C25H30N2O5	438.516	KNApSAcK
(-)-12-Hydroxyvincadifformine	CCC12CCCN3CCC4(C13)C(=C(C2)C(=O)OC)Nc5c(O)cccc45	C21H26N2O3	354.443	KNApSAcK
(-)-12-Methoxy-2,3-dihydrocitromycetin	COc1c(O)cc2OCC3=C(OC(C)CC3=O)c2c1C(=O)O	C15H14O7	306.267	KNApSAcK
(-)-12-Methoxykopsinaline Kopsinine T	COC(=O)C1(O)CC23CCCN4CCC5(C24)c6cccc(OC)c6NC15CC3	C22H28N2O4	384.469	KNApSAcK
(-)-13-beta-Hydroxystylopine	OC1C2N(CCc3cc4OCOc4cc23)Cc5c6OCOc6ccc15	C19H17NO5	339.342	KNApSAcK
(-)-13alpha-Hydroxydeguelin	COc1cc2OC(O)C3Oc4c5C=CC(C)(C)Oc5ccc4C(=O)C3c2cc1OC	C23H22O7	410.417	KNApSAcK
(-)-13alpha-Hydroxytephrosin	COc1cc2OC(O)C3Oc4c5C=CC(C)(C)Oc5ccc4C(=O)C3(O)c2cc1OC	C23H22O8	426.416	KNApSAcK
(-)-14-deoxy-17-Norparaherquamide (-)-Paraherquamide B 14-Demethyl-14-deoxyparah	CN1C(=O)C23CCCN2CC14CC5(C(=O)Nc6c7OC=CC(C)(C)Oc7ccc56)C(C)(C)C4C3	C27H33N3O4	463.569	KNApSAcK
(-)-14-O-Acetylindolactam-V	CC(C)C1N(C)c2cccc3[nH]cc(CC(COC(=O)C)NC1=O)c23	C19H25N3O3	343.42	KNApSAcK
(-)-14-O-Malonylindolactam-V	CC(C)C1N(C)c2cccc3[nH]cc(CC(COC(=O)CC(=O)O)NC1=O)c23	C20H25N3O5	387.43	KNApSAcK
(-)-16-Epivincamine (-)-cis-Epivincamine	CCC12CCCN3CCc4c(C13)n(c5ccccc45)C(O)(C2)C(=O)OC	C21H26N2O3	354.443	KNApSAcK
(-)-16alpha-Hydroxykauran-19-oic acid	CC1(O)CC23CCC4C(C)(CCCC4(C)C(=O)O)C2CCC1C3	C20H32O3	320.466	KNApSAcK
(-)-17-Hydroxy-16alpha-kauran-19-oic acid	CC12CCCC(C)(C1CCC34CC(CO)C(CCC23)C4)C(=O)O	C20H32O3	320.466	KNApSAcK
(-)-17-O-(3',4',5'-Trimethoxycinnamoyl)vincamajine 17-(3',4',5'-Trimethoxycinnam	COC(=O)C12C3CC4(C1OC(=O)\C=C\c5cc(OC)c(OC)c(OC)c5)C(C6CC2\C(=C/C)\CN36)N(C)c7ccccc47	C34H38N2O7	586.675	KNApSAcK
(-)-1abeta,2,4alpha,5,6,7,7a,7bbeta-Octahydro-1,1,7beta,7abeta-tetramethyl-1H-cy	CC1CCC(O)C2=CCC3C(C3(C)C)C12C	C15H24O	220.35	KNApSAcK
(-)-1beta,10betaH-Cadin-4-ene-3alpha,10-diol	CC(C)C1CCC(C)(O)C2CC(O)C(=CC12)C	C15H26O2	238.366	KNApSAcK
(-)-1S,9R-9-Hydroxy-2,2,5,9-tetramethylbicyclo[6.3.0]undeca-4,7-dien-6-one	C\C\1=C\CC(C)(C)C2CCC(C)(O)/C/2=C/C1=O	C15H22O2	234.334	KNApSAcK
(-)-2'-Norlimacine 2'-Demethyl-(-)-fangchinoline 2'-Demethyllimacine 2'-N-Norlim	COc1ccc2CC3N(C)CCc4cc(OC)c(O)c(Oc5cc6C(Cc7ccc(Oc1c2)cc7)NCCc6cc5OC)c34	C36H38N2O6	594.697	KNApSAcK
(-)-2'beta-(2zeta-Hydroxy-3-methyl-1-oxobutyl)-2'-deoxybruceol	CC(C)C(O)C(=O)C1C2C3CCC1(C)Oc4c5C=CC(=O)Oc5cc(OC3(C)C)c24	C24H28O6	412.476	KNApSAcK
(-)-2'beta-{(E)-3-Hydroxy-3-methylbut-1-enyl}-2'-deoxybruceol	CC(C)(O)\C=C\C1C2C3CCC1(C)Oc4c5C=CC(=O)Oc5cc(OC3(C)C)c24	C24H28O5	396.476	KNApSAcK
(-)-2,2'-Bisnorphaeanthine 2,2'-Didemethylpheanthine	COc1ccc2CC3NCCc4cc(OC)c(OC)c(Oc5cc6C(Cc7ccc(Oc1c2)cc7)NCCc6cc5OC)c34	C36H38N2O6	594.697	KNApSAcK
(-)-2,3,4-Trimethoxy-8,9-methylenedioxypterocarpan	COc1cc2C3Oc4cc5OCOc5cc4C3COc2c(OC)c1OC	C19H18O7	358.342	KNApSAcK
(-)-2,3-Dihydro-6-hydroxy-2-methyl-naphtho[1,2-b]furan-4,5-dione (-)-Nocardione	CC1CC2=C(O1)c3cccc(O)c3C(=O)C2=O	C13H10O4	230.216	KNApSAcK
(-)-2,3-Dihydro-6-methoxy-2-methyl-naphtho[1,2-b]furan-4,5-dione (-)-Nocardione	COc1cccc2C3=C(CC(C)O3)C(=O)C(=O)c12	C14H12O4	244.243	KNApSAcK
(-)-2,3-Dihydro-9-O-beta-glucosyloxy-2-isopropenyl-7H-furo[3,2-g][1]benzopyran-7	CC(=C)C1Cc2cc3C=CC(=O)Oc3c(OC4OC(CO)C(O)C(O)C4O)c2O1	C20H22O9	406.383	KNApSAcK
(-)-2,3-Dihydrocitromycetin	CC1CC(=O)C2=C(O1)c3c(OC2)cc(O)c(O)c3C(=O)O	C14H12O7	292.241	KNApSAcK
(-)-2,3-Dihydrocitromycin (-)-Neuchromenin	CC1CC(=O)C2=C(O1)c3cc(O)c(O)cc3OC2	C13H12O5	248.231	KNApSAcK
(-)-2-Acetoxyamorpha-4,7(11)-diene	CC1CCC(=C(C)C)C2C=C(C)CC(OC(=O)C)C12	C17H26O2	262.387	KNApSAcK
(-)-2-Methoxymaackiain	COc1cc2C3Oc4cc5OCOc5cc4C3COc2cc1O	C17H14O6	314.289	KNApSAcK
(-)-2-Norisocepharanthine 2'-Nor-1-epicepharanthine	COc1ccc2CC3NCCc4cc(OC)c(Oc5c6OCOc6cc7CCN(C)C(Cc8ccc(Oc1c2)cc8)c57)cc34	C36H36N2O6	592.681	KNApSAcK
(-)-2beta-(2zeta-Hydroperoxy-3-methylbut-3-enyl)-2'-deoxybruceol	CC(=C)C(CC1C2C3CCC1(C)Oc4c5C=CC(=O)Oc5cc(OC3(C)C)c24)OO	C24H28O6	412.476	KNApSAcK
(-)-2beta-{(E)-3-Hydroperoxy-3-methylbut-1-enyl}-2'-deoxybruceol	CC(C)(OO)\C=C\C1C2C3CCC1(C)Oc4c5C=CC(=O)Oc5cc(OC3(C)C)c24	C24H28O6	412.476	KNApSAcK
(-)-3'-Methoxy specinonin	CCOC1CC2C(OC(=O)c3ccc(O)c(OC)c3)C4OC4(CO)C2C(OCC)O1	C21H28O9	424.442	KNApSAcK
(-)-3-Isothujone (-)-alpha-Thujone	CC(C)C12CC1C(C)C(=O)C2	C10H16O	152.233	KNApSAcK
(-)-3-[2-(Acetyloxy)propyl]-2-hydroxy-8-methoxy-1,4-naphthoquinone	COc1cccc2C(=O)C(=C(O)C(=O)c12)CC(C)OC(=O)C	C16H16O6	304.295	KNApSAcK
(-)-4'-Methylepigallocatechin 5-O-beta-glucopyranoside	COc1c(O)cc(cc1O)C2Oc3cc(O)cc(OC4OC(CO)C(O)C(O)C4O)c3CC2O	C22H26O12	482.435	KNApSAcK
(-)-4'-O-Methyl-nyasol	COc1ccc(\C=C/C(C=C)c2ccc(O)cc2)cc1	C18H18O2	266.334	KNApSAcK
(-)-4'-O-Methylcoclaurine	COc1ccc(CC2NCCc3cc(OC)c(O)cc23)cc1	C18H21NO3	299.364	KNApSAcK
(-)-4,11,12a-Trihydroxy-9-methoxyrotenone	COc1cc(O)c2C(=O)C3(O)C(COc4c(O)cccc34)Oc2c1	C17H14O7	330.289	KNApSAcK
(-)-4,6'-Anhydrooxysporidinone	CCC(C)CC(C)\C=C(/C)\C1OC(CCC1C)C2=C3OC4CC(=O)CCC4(O)C3=CN(C)C2=O	C28H41NO5	471.629	KNApSAcK
(-)-4,9,11,12a-Tetrahydroxyrotenone	Oc1cc(O)c2C(=O)C3(O)C(COc4c(O)cccc34)Oc2c1	C16H12O7	316.262	KNApSAcK
(-)-4-Methoxy-13,14-dihydrooxypalmatine	COc1ccc2CC3N(CCc4c(OC)c(OC)c(OC)cc34)C(=O)c2c1OC	C22H25NO6	399.437	KNApSAcK
(-)-4-O-galloylbergenin	COc1c(O)cc2C(=O)OC3C(OC(=O)c4cc(O)c(O)c(O)c4)C(O)C(CO)OC3c2c1O	C21H20O13	480.376	KNApSAcK
(-)-5'-Methoxyyatein	COc1cc(CC2C(Cc3cc(OC)c4OCOc4c3)COC2=O)cc(OC)c1OC	C23H26O8	430.448	KNApSAcK
(-)-5,5-Dimethyl-4-methylene-2-cyclohexene-1-carboxylic acid	CC1(C)CC(C=CC1=C)C(=O)O	C10H14O2	166.217	KNApSAcK
(-)-5-Methoxybalanophonin	COc1cc(cc(OC)c1O)C2Oc3c(OC)cc(\C=C\C=O)cc3C2CO	C21H22O7	386.395	KNApSAcK
(-)-5-Methoxypodophyllotoxin	COc1cc(cc(OC)c1OC)C2C3C(COC3=O)C(O)c4c(OC)c5OCOc5cc24	C23H24O9	444.431	KNApSAcK
(-)-6-Chloroepicatechin	OC1Cc2c(O)c(Cl)c(O)cc2OC1c3ccc(O)c(O)c3	C15H13ClO6	324.713	KNApSAcK
(-)-6-Deoxyoxysporidinone	CCC(C)CC(C)\C=C(/C)\C1OC(CCC1C)C2=C(O)C(=CN(C)C2=O)C3(O)CCC(=O)CC3	C28H43NO5	473.645	KNApSAcK
(-)-6-Deoxypsiadiol	CC1(CO)CCCC2(C)C(CCc3cocc3)C(=C)CCC12	C20H30O2	302.451	KNApSAcK
(-)-6-Geranylpinocembrin	CC(=CCC\C(=C\Cc1c(O)cc2OC(CC(=O)c2c1O)c3ccccc3)\C)C	C25H28O4	392.487	KNApSAcK
(-)-7'-Hydroxylappaol E	COc1cc(CC2C(COC2=O)C(O)c3ccc(OC(CO)C(O)c4ccc(O)c(OC)c4)c(OC)c3)ccc1O	C30H34O11	570.584	KNApSAcK
(-)-7,4'-Dihydroxy-5-methoxyflavanone 7,4'-Dihydroxy-5-methoxyflavanone Naringen	COc1cc(O)cc2OC(CC(=O)c12)c3ccc(O)cc3	C16H14O5	286.279	KNApSAcK
(-)-7-(6,7-Dihydroxy-3,7-dimethyl-5-oxooctanoxy)-coumarin	CC(CCOc1ccc2C=CC(=O)Oc2c1)CC(=O)C(O)C(C)(C)O	C19H24O6	348.39	KNApSAcK
(-)-7-Demethylpiericidin A1 Antibiotic SN 198D SN 198D	COc1nc(C\C=C(/C)\C\C=C\C=C\C(C)C(O)\C(=C\C)\C)c(C)c(O)c1OC	C24H35NO4	401.539	KNApSAcK
(-)-7-epi-Isojunenol	CC(C)C1CCC2(C)CCC=C(C)C2C1O	C15H26O	222.366	KNApSAcK
(-)-7-Hydroxycalamenene	CC(C)C1CCC(C)c2cc(O)c(C)cc12	C15H22O	218.335	KNApSAcK
(-)-7-Hydroxycannabichromane (-)-(-)-7-Hydroxycannabichromane	CCCCCc1cc(O)c2CC(O)C(C)(CCC=C(C)C)Oc2c1	C21H32O3	332.477	KNApSAcK
(-)-7-Hydroxylariciresinol 9'-p-coumarate	COc1cc(ccc1O)C(O)C2COC(C2COC(=O)\C=C\c3ccc(O)cc3)c4ccc(O)c(OC)c4	C29H30O9	522.543	KNApSAcK
(-)-7R-Cannabicoumarononic acid A	CCCCCc1cc2OC(C)(C)C(CCC(=O)C)c3coc(c1C(=O)O)c23	C22H28O5	372.455	KNApSAcK
(-)-8'-epi-Aristoligol Holostylol A	COc1ccc(cc1OC)C2C(C)C(C)C(O)c3cc(OC)c(OC)cc23	C22H28O5	372.455	KNApSAcK
(-)-8,14-dihydrosalutaridine 8,14-Dihydrosalutaridine	COC1=CC23CCN(C)C(Cc4ccc(OC)c(O)c24)C3CC1=O	C19H23NO4	329.39	KNApSAcK
(-)-8-(2-Carboxy-1-phenylethyl)-3,5,7-trihydroxyflavone delta-lactone (-)-9,10-D	OC1=C(Oc2c3C(CC(=O)Oc3cc(O)c2C1=O)c4ccccc4)c5ccccc5	C24H16O6	400.38	KNApSAcK
(-)-8-O-Methyloblongine	COc1ccc2CC[N+](C)(C)C(Cc3ccc(O)cc3)c2c1OC	C20H26NO3	328.425	KNApSAcK
(-)-8-Oxocanadine Gusanlung B	COc1ccc2CC3N(CCc4cc5OCOc5cc34)C(=O)c2c1OC	C20H19NO5	353.369	KNApSAcK
(-)-8-Oxoisocorypalmine	COc1cc2CCN3C(Cc4ccc(OC)c(OC)c4C3=O)c2cc1O	C20H21NO5	355.384	KNApSAcK
(-)-8-Oxotetrahydropalmatine	COc1cc2CCN3C(Cc4ccc(OC)c(OC)c4C3=O)c2cc1OC	C21H23NO5	369.411	KNApSAcK
(-)-8-Oxotetrahydrothalifendine 8-Oxotetrahydrothalifendine	COc1c(O)ccc2CC3N(CCc4cc5OCOc5cc34)C(=O)c12	C19H17NO5	339.342	KNApSAcK
(-)-Acanthocarpan	OC12COc3c4OCOc4ccc3C1Oc5cc6OCOc6cc25	C17H12O7	328.273	KNApSAcK
(-)-Acetylsukhodianine (-)-O-Acetylsukhodianine	COc1ccc2c(C(OC(=O)C)C3N(C)CCc4cc5OCOc5c2c34)c1OC	C22H23NO6	397.421	KNApSAcK
(-)-Actinonin Actinonin	CCCCCC(CC(=O)NO)C(=O)NC(C(C)C)C(=O)N1CCCC1CO	C19H35N3O5	385.498	KNApSAcK
(-)-Aflastatin B Aflastatin B	CCCCCCCCCC(O)CC1(O)OC(CC(O)C(O)C(O)C(O)C(O)CC(O)CC(O)CC(O)C(C)C(O)C(C)C(O)CC(O)C(C)C(O)C(C)C(O)C(C)C(O)C(O)CC(C)CC(C)\C=C(/C)\C(=C\2/C(=O)NC(C)C2=O)\O)C(O)C(O)C1O	C61H113NO24	1244.54	KNApSAcK
(-)-Agbanindiol A	CC1CCC2(C)C(CCC(O)C2=C)C1(C)CC\C(=C\CO)\C	C20H34O2	306.483	KNApSAcK
(-)-Agelastatin A	CN1C(=O)NC2C3NC(=O)c4ccc(Br)n4C3CC12O	C12H13BrN4O3	341.161	KNApSAcK
(-)-Alatoside A Alatoside A(Laggera alata)	CC(=C)C1CCC2(C)C(OC3OC(CO)C(O)C(O)C3O)C(O)CC(C)(O)C2C1	C21H36O8	416.506	KNApSAcK
(-)-Alisamycin Alisamycin	OC1=C(NC(=O)\C=C\C=C\C=C\C2(O)C=C(NC(=O)\C=C\C=C\C3CCCCC3)C(=O)C4OC24)C(=O)CC1	C29H32N2O7	520.574	KNApSAcK
(-)-Alkannin Alkannin	CC(=CCC(O)C1=CC(=O)c2c(O)ccc(O)c2C1=O)C	C16H16O5	288.295	KNApSAcK
(-)-allo-Muscarine	CC1OC(C[N+](C)(C)C)CC1O	C9H20NO2	174.261	KNApSAcK
(-)-alpha-Acoradiene	CC1CCC(C(=C)C)C12CCC(=CC2)C	C15H24	204.351	KNApSAcK
(-)-alpha-Alasken-6beta-ol	CC1CCC(=C(C)C)C12CC=C(C)CC2O	C15H24O	220.35	KNApSAcK
(-)-alpha-Alasken-8-one	CC1CC(=O)C(=C(C)C)C12CCC(=CC2)C	C15H22O	218.335	KNApSAcK
(-)-alpha-Bisabolol oxide A alpha-Bisabolol oxide alpha-Bisabolol oxide A Bisabo	CC1=CCC(CC1)C2(C)CCC(O)C(C)(C)O2	C15H26O2	238.366	KNApSAcK
(-)-alpha-Bisabolol oxide B (-)-Bisabolol oxide B alpha-Bisabolol oxide B Bisabo	CC1=CCC(CC1)C2(C)CCC(O2)C(C)(C)O	C15H26O2	238.366	KNApSAcK
(-)-alpha-canadine methohydroxide	COc1ccc2CC3c4cc5OCOc5cc4CC[N+]3(C)Cc2c1OC	C21H24NO4	354.42	KNApSAcK
(-)-alpha-Chamipinene	CC(=C)CCC\C(=C\1/CCC(=CC1)C)\C	C15H24	204.351	KNApSAcK
(-)-alpha-Costol alpha-Costol [2R-(2alpha,4aalpha,8abeta)]-1,2,3,4,4a,5,6,8a-Oct	CC1=CCCC2(C)CCC(CC12)C(=C)CO	C15H24O	220.35	KNApSAcK
(-)-alpha-Fenchene (-)-7,7-dimethyl-2-methylenenorbornane	CC1(C)C2CCC1C(=C)C2	C10H16	136.234	KNApSAcK
(-)-alpha-Herbertenol alpha-Herbertenol 4-Hydroxyisocuparene (S)-4-Methyl-2-(1,2	Cc1ccc(O)c(c1)C2(C)CCCC2(C)C	C15H22O	218.335	KNApSAcK
(-)-alpha-Hydrastine alpha-Hydrastine	COc1ccc2C(OC(=O)c2c1OC)C3N(C)CCc4cc5OCOc5cc34	C21H21NO6	383.395	KNApSAcK
(-)-alpha-Microbiotene	CC1=CCC2(CC12)C3(C)CCCC3(C)C	C15H24	204.351	KNApSAcK
(-)-alpha-Thujene	CC(C)C12CC=C(C)C1C2	C10H16	136.234	KNApSAcK
(-)-Alpinetin Alpinetin	COc1cc(O)cc2OC(CC(=O)c12)c3ccccc3	C16H14O4	270.28	KNApSAcK
(-)-Alpinone	COc1cc(O)c2C(=O)C(O)C(Oc2c1)c3ccccc3	C16H14O5	286.279	KNApSAcK
(-)-Altissinone	COc1c2OCOc2ccc1C(=O)C3COC(C3CO)c4ccc5OCOc5c4	C21H20O8	400.379	KNApSAcK
(-)-Amorpha-4,7(11)-diene	CC1CCC(=C(C)C)C2C=C(C)CCC12	C15H24	204.351	KNApSAcK
(-)-Amurensisin Amurensisin 2-[(2R,3R)-3,4-dihydro-3,5,7-trihydroxy-2H-1-benzopy	OC1Cc2c(O)cc(O)cc2OC1c3cc(O)c4OC(=O)c5cc(O)c(O)c(O)c5c4c3	C22H16O10	440.356	KNApSAcK
(-)-Amurine	COC1=CC23CCN(C)C(Cc4cc5OCOc5cc24)C3=CC1=O	C19H19NO4	325.358	KNApSAcK
(-)-Anabasine	C1CCC(NC1)c2cccnc2	C10H14N2	162.232	KNApSAcK
(-)-Angustureine Angustureine	CCCCCC1CCc2ccccc2N1C	C15H23N	217.35	KNApSAcK
(-)-Anolobine Anolobine	Oc1ccc2c(CC3NCCc4cc5OCOc5c2c34)c1	C17H15NO3	281.306	KNApSAcK
(-)-Antioquine	COc1ccc2CCN(C)C3Cc4ccc(O)c(c4)c5cc(CC6N(C)CCc7cc(OC)c(O)c(Oc1c23)c67)ccc5OC	C37H40N2O6	608.723	KNApSAcK
(-)-Aphanorphine (-)-8-Hydroxy-1,3-dimethyl-2,3,4,5-tetrahydro-1,4-methano-3-ben	CN1CC2(C)CC1Cc3ccc(O)cc23	C13H17NO	203.28	KNApSAcK
(-)-Apicularen A Apicularen A Apicularene A	CC\C=C/C=C\C(=O)N\C=C\CC1CC2CC(O)CC(Cc3cccc(O)c3C(=O)O1)O2	C25H31NO6	441.517	KNApSAcK
(-)-Aplysistatin Aplysistatin	CC1(C)C(Br)CCC2(C)OC3COC(=O)C3=CCC12	C15H21BrO3	329.229	KNApSAcK
(-)-Apparicine Apparicine	C\C=C/1\CN2CCC1C(=C)c3[nH]c4ccccc4c3C2	C18H20N2	264.365	KNApSAcK
(-)-Arborescidine B	CN1CCc2c3C1CCC=Cn3c4cc(Br)ccc24	C16H17BrN2	317.224	KNApSAcK
(-)-Arborescidine C	CN1CCc2c3C1CCCC(O)n3c4cc(Br)ccc24	C16H19BrN2O	335.239	KNApSAcK
(-)-Arbusculin D Arbusculin D [5aR-(5aalpha,9beta,9abeta,9balpha)]-5,5a,6,7,8,9,	CC1(O)CCCC2(C)CCC3=C(CO)C(=O)OC3C12	C15H22O4	266.333	KNApSAcK
(-)-Arctiin	COc1ccc(CC2COC(=O)C2Cc3ccc(OC4OC(CO)C(O)C(O)C4O)c(OC)c3)cc1OC	C27H34O11	534.552	KNApSAcK
(-)-Argemonine	COc1cc2CC3N(C)C(Cc4cc(OC)c(OC)cc34)c2cc1OC	C21H25NO4	355.427	KNApSAcK
(-)-Argophyllone B Argophyllone B	C\C=C(\C)/C(=O)OC1CC2(C)OC2CC(=O)C(CO)CC3OC(=O)C(=C)C13	C20H26O7	378.416	KNApSAcK
(-)-Aristeromycin 1'a-Carbaadenosine Aristeromycin Cycloadenosine NSC 103526	Nc1ncnc2c1ncn2C3CC(CO)C(O)C3O	C11H15N5O3	265.269	KNApSAcK
(-)-Aristoligone	COc1ccc(cc1OC)C2C(C)C(C)C(=O)c3cc(OC)c(OC)cc23	C22H26O5	370.439	KNApSAcK
(-)-Aristotetralone	COc1cc2C(C(C)C(C)C(=O)c2cc1OC)c3ccc4OCOc4c3	C21H22O5	354.396	KNApSAcK
(-)-Aromadendran-5-ol	CC1CCC2C(C2(C)C)C3(O)C(C)CCC13	C15H26O	222.366	KNApSAcK
(-)-Artemisin 8-Hydroxysantonin [3S-(3alpha,3aalpha,4alpha,5abeta,9bbeta)]-3a,5,	CC1C2C(O)CC3(C)C=CC(=O)C(=C3C2OC1=O)C	C15H18O4	262.301	KNApSAcK
(-)-Asimilobine Asimilobine	COc1c(O)cc2CCNC3Cc4ccccc4c1c23	C17H17NO2	267.322	KNApSAcK
(-)-Asperfuran Asperfuran	C\C=C\C=C\C1Cc2cc(O)cc(O)c2O1	C13H14O3	218.248	KNApSAcK
(-)-Asperlicin Asperlicin	CC(C)CC1NC2N(C1=O)c3ccccc3C2(O)CC4NC(=O)c5ccccc5N6C(=O)c7ccccc7N=C46	C31H29N5O4	535.593	KNApSAcK
(-)-Asperlicin C Asperlicin C	O=C1NC(Cc2c[nH]c3ccccc23)C4=Nc5ccccc5C(=O)N4c6ccccc16	C25H18N4O2	406.436	KNApSAcK
(-)-Aspidospermine Aspidospermine	CCC12CCCN3CCC4(C(CC1)N(C(=O)C)c5c(OC)cccc45)C23	C22H30N2O2	354.486	KNApSAcK
(-)-Auranamide	O=C(OCC(Cc1ccccc1)NC(=O)c2ccccc2)C(Cc3ccccc3)NC(=O)c4ccccc4	C32H30N2O4	506.592	KNApSAcK
(-)-Bactobolin Antibiotic BN 183B Bactobolin NSC 325014 Y 12278	CC(N)C(=O)NC1C2C(O)C(O)CC(=C2C(=O)OC1(C)C(Cl)Cl)O	C14H20Cl2N2O6	383.224	KNApSAcK
(-)-Balanol BalanolAzepinostatin Balanol Ophiocordin	OC(=O)c1cccc(O)c1C(=O)c2c(O)cc(cc2O)C(=O)OC3CCCNCC3NC(=O)c4ccc(O)cc4	C28H26N2O10	550.513	KNApSAcK
(-)-Balanophonin Balanophonin	COc1cc(ccc1O)C2Oc3c(OC)cc(\C=C\C=O)cc3C2CO	C20H20O6	356.369	KNApSAcK
(-)-Benghalensin B Benghalensin B [5aS-(5aalpha,8beta,8aalpha)]-2,5a,6,7,8,8a-He	CC(C)C1(O)CCC2(C)C=CC(=O)C3=C2C1(O)OC3	C15H20O4	264.317	KNApSAcK
(-)-Benzastatin C Benzastatin C Benzastatine C	COCC1(CCC(=C(C)C)C)Nc2ccc(cc2CC1Cl)C(=O)N	C19H27ClN2O2	350.883	KNApSAcK
(-)-Benzastatin D Benzastatin D Benzastatine D	COCC1(CCC(=C(C)C)C)Nc2ccc(cc2CC1O)C(=O)N	C19H28N2O3	332.437	KNApSAcK
(-)-Benzomalvin A Benzomalvin A	CN1C(Cc2ccccc2)C3=Nc4ccccc4C(=O)N3c5ccccc5C1=O	C24H19N3O2	381.427	KNApSAcK
(-)-Bestatin Bestatin NK 421 NSC 265489 Ubenimex	CC(C)CC(NC(=O)C(O)C(N)Cc1ccccc1)C(=O)O	C16H24N2O4	308.373	KNApSAcK
(-)-beta-Curcumene beta-Curcumene l-beta-Curcumene	CC(CCC=C(C)C)C1=CCC(=CC1)C	C15H24	204.351	KNApSAcK
(-)-beta-Elemenal (-)-Elema-1,3,11(13)-trien-12-al	CC(=C)C1CC(CCC1(C)C=C)C(=C)C=O	C15H22O	218.335	KNApSAcK
(-)-beta-Elemene	CC(=C)C1CCC(C)(C=C)C(C1)C(=C)C	C15H24	204.351	KNApSAcK
(-)-beta-Herbertenol beta-Herbertenol 2-Hydroxyisocuparene (S)-2-Methyl-4-(1,2,2	Cc1cc(ccc1O)C2(C)CCCC2(C)C	C15H22O	218.335	KNApSAcK
(-)-beta-Longipinene beta-Longipinene	CC1(C)CCCC2(C)C3CCC(=C)C2C13	C15H24	204.351	KNApSAcK
(-)-beta-Peltatin beta-Peltatin	COc1cc(cc(OC)c1OC)C2C3C(COC3=O)Cc4c(O)c5OCOc5cc24	C22H22O8	414.405	KNApSAcK
(-)-beta-Pinene (-)-Nopinene	CC1(C)C2CCC(=C)C1C2	C10H16	136.234	KNApSAcK
(-)-beta-Selinene (-)-Eudesma-4(14),11-diene [4aS-(4aalpha,7alpha,8abeta)]-Decah	CC(=C)C1CCC2(C)CCCC(=C)C2C1	C15H24	204.351	KNApSAcK
(-)-beta-Sitosterol Sitosterol beta-sitosterl Stigmast-5-en-3beta-ol	CCC(CCC(C)C1CCC2C3CC=C4CC(O)CCC4(C)C3CCC12C)C(C)C	C29H50O	414.707	KNApSAcK
(-)-Betonicine 4-Hydroxyproline betaine	C[N+]1(C)CC(O)CC1C(=O)[O-]	C7H13NO3	159.183	KNApSAcK
(-)-Bicycloelemene Bicycloelemene	CC(=C)C1C2C(CCC1(C)C=C)C2(C)C	C15H24	204.351	KNApSAcK
(-)-Bidwillon A 7,2',4'-Trihydroxy-6,8-diprenylisoflavanone	CC(=CCc1cc2C(=O)C(COc2c(CC=C(C)C)c1O)c3ccc(O)cc3O)C	C25H28O5	408.487	KNApSAcK
(-)-Bisabosqual C Bisabosqual C	CC(=CCCC1(C)Oc2cc(C=O)c(C=O)c3OC4C(C)(O)CCC1C4(O)c23)C	C23H28O6	400.465	KNApSAcK
(-)-Bisisomahanine	CC(=CCCC1(C)Oc2ccc3c4cc(C)c(O)c(c5c(O)c(C)cc6c7ccc8OC(C)(CCC=C(C)C)C=Cc8c7[nH]c56)c4[nH]c3c2C=C1)C	C46H48N2O4	692.884	KNApSAcK
(-)-Bisnorargemonine Rotundine Rotundine	COc1cc2CC3N(C)C(Cc4cc(O)c(OC)cc34)c2cc1O	C19H21NO4	327.374	KNApSAcK
(-)-Bisparthenolidine Bisparthenolidine	C\C\1=C/CCC2(C)OC2C3OC(=O)C(CNCC4C5CC\C(=C\CCC6(C)OC6C5OC4=O)\C)C3CC1	C30H43NO6	513.666	KNApSAcK
(-)-Blastmycinolactol	CCCCC1C(O)C(C)OC1=O	C9H16O3	172.222	KNApSAcK
(-)-Blechnic acid (-)-trans-Blechnic acid	OC(=O)\C=C\c1ccc(O)c2OC(C(C(=O)O)c12)c3ccc(O)c(O)c3	C18H14O8	358.299	KNApSAcK
(-)-Blepharocalyxin A Blepharocalyxin A	COc1cc(O)c(C(\C=C\CC(O)CCc2ccc(O)cc2)c3ccc(O)cc3)c(O)c1C(=O)C4C(CC(CCc5ccc(O)cc5)OC4c6ccc(O)cc6)\C=C\c7ccc(O)cc7	C54H54O11	879	KNApSAcK
(-)-Blestriarene C Blestriarene C Cirrhopetalanthrin 4,4'-Dimethoxy-2,2',7,7'-te	COc1cc(O)c(c2c(O)cc(OC)c3c2ccc4cc(O)ccc34)c5ccc6cc(O)ccc6c15	C30H22O6	478.492	KNApSAcK
(-)-Blumealactone A Blumealactone A	C\C=C(\C)/C(=O)OC1C2OC2(C)CCCC(C)C(O)C3OC(=O)C(=C)C13	C20H28O6	364.433	KNApSAcK
(-)-Blumealactone B Blumealactone B	CC1CCCC2(C)OC2C(OC(=O)C=C(C)C)C3C(OC(=O)C3=C)C1O	C20H28O6	364.433	KNApSAcK
(-)-Blumealactone C Blumealactone C	CC1CCCC2(C)OC2C(O)C3C(OC(=O)C3=C)C1OC(=O)C	C17H24O6	324.369	KNApSAcK
(-)-Bornesitol	COC1C(O)C(O)C(O)C(O)C1O	C7H14O6	194.182	KNApSAcK
(-)-Brainic acid	OC1C=C(CC(OC(=O)C2C(Oc3c(O)ccc(\C=C\C(=O)O)c23)c4ccc(O)c(O)c4)C1O)C(=O)O	C25H22O12	514.435	KNApSAcK
(-)-Burseran	COc1cc(CC2COCC2Cc3ccc4OCOc4c3)cc(OC)c1OC	C22H26O6	386.438	KNApSAcK
(-)-Butyrospermol Butyrospermol	CC(CCC=C(C)C)C1CCC2(C)C3=CCC4C(C)(C)C(O)CCC4(C)C3CCC12C	C30H50O	426.717	KNApSAcK
(-)-Buxapapinolamine	CC(C1C(CC2(C)C3CC(O)C4C(=CCC(NC(=O)c5ccccc5)C4(C)C=O)CC3=CCC12C)OC(=O)C)N(C)C	C35H48N2O5	576.766	KNApSAcK
(-)-Caaverine Caaverine	COc1cc2CCNC3Cc4ccccc4c(c1O)c23	C17H17NO2	267.322	KNApSAcK
(-)-Cadala-1,4,9-triene	CC(C)C1CC=C(C)C2=CCC(=CC12)C	C15H22	202.335	KNApSAcK
(-)-Cagayanone A	CC1C(C)C(=O)c2cc3OCOc3cc2C1c4ccc5OCOc5c4	C20H18O5	338.354	KNApSAcK
(-)-Calanolide B	CCCC1=CC(=O)Oc2c3C(O)C(C)C(C)Oc3c4C=CC(C)(C)Oc4c12	C22H26O5	370.439	KNApSAcK
(-)-Calycinine Calycinine	COc1cc(O)c2c(CC3NCCc4cc5OCOc5c2c34)c1	C18H17NO4	311.332	KNApSAcK
(-)-Caprazamycin B Caprazamycin B	COC1C(C)OC(OC(=O)CC(C)CC(=O)OC(CCCCCCCCCCC(C)C)CC(=O)OC2CN(C)C(C(OC3OC(CN)C(O)C3O)C4OC(C(O)C4O)N5C=CC(=O)NC5=O)C(=O)N(C)C2C(=O)O)C(OC)C1OC	C53H87N5O22	1146.28	KNApSAcK
(-)-Car-3-en-2-one	CC1=CCC2C(C1=O)C2(C)C	C10H14O	150.218	KNApSAcK
(-)-Carney's ketol Carney's ketol	CC1CCC(O)(C1C(=O)C=C(C)C)c2cocc2	C15H20O3	248.317	KNApSAcK
(-)-Carvomenthone	CC(C)C1CCC(C)C(=O)C1	C10H18O	154.249	KNApSAcK
(-)-Caryolivine Caryolivine	COc1ccc2Cc3nccc4cc(OC)c(O)c(Oc5cc6C(Cc7ccc(Oc1c2)cc7)N(C)CCc6cc5OC)c34	C36H34N2O6	590.665	KNApSAcK
(-)-Centrolobol	OC(CCCCc1ccc(O)cc1)CCc2ccc(O)cc2	C19H24O3	300.392	KNApSAcK
(-)-Cherylline (S)-(-)-Cherylline Cherylline Cheryllin Crinine(C17 alkaloid) Cri	COc1cc2C(CN(C)Cc2cc1O)c3ccc(O)cc3	C17H19NO3	285.338	KNApSAcK
(-)-Chicanine	COc1cc(ccc1O)C2OC(C(C)C2C)c3ccc4OCOc4c3	C20H22O5	342.386	KNApSAcK
(-)-Chiloscyphone	CC1CCC=C2CCC(C(=O)C(=C)C)C12C	C15H22O	218.335	KNApSAcK
(-)-Chrolactomycin Chrolactomycin	COC12C3OC(C(C)CC(C)CCCC4C=C(C(C)CC34OC1=O)C(=O)O)C(=C)C2=O	C24H32O7	432.507	KNApSAcK
(-)-Chrysanthenone	CC1=CCC2C(=O)C1C2(C)C	C10H14O	150.218	KNApSAcK
(-)-Chrysogine	CC(O)C1=NC(=O)c2ccccc2N1	C10H10N2O2	190.199	KNApSAcK
(-)-cis,trans-Nepetalactone	CC1CCC2C1C(=O)OC=C2C	C10H14O2	166.217	KNApSAcK
(-)-cis-1,2-Dihydroxy-1,2-dihydromedicosmine	COc1c2ccoc2nc3ccc4OC(C)(C)C(O)C(O)c4c13	C17H17NO5	315.321	KNApSAcK
(-)-cis-Cadina-1(6),4-diene	CC(C)C1CCC(C)C2=C1C=C(C)CC2	C15H24	204.351	KNApSAcK
(-)-cis-Xylopinine N-oxide	COc1cc2CC3c4cc(OC)c(OC)cc4CCN3(=O)Cc2cc1OC	C21H25NO5	371.427	KNApSAcK
(-)-Cissaglaberrimine	Oc1c2CCNC3Cc4ccccc4c(c5OCOc15)c23	C17H15NO3	281.306	KNApSAcK
(-)-Clusin Clusin	COc1cc(CC2C(Cc3ccc4OCOc4c3)COC2O)cc(OC)c1OC	C22H26O7	402.438	KNApSAcK
(-)-Codeinone 6-Oxocodeine	COc1ccc2CC3C4C=CC(=O)C5Oc1c2C45CCN3C	C18H19NO3	297.348	KNApSAcK
(-)-Conduritol F Leucanthemitol	OC1C=CC(O)C(O)C1O	C6H10O4	146.141	KNApSAcK
(-)-Coralloidin C Coralloidin C (1R-trans)-1,3,4,5,6,7-Hexahydro-1-methyl-7-(1-m	CC1CCCC2(COC(=O)C)CCC(=C(C)C)C=C12	C17H26O2	262.387	KNApSAcK
(-)-Coralloidin D Coralloidin D (R)-2-(3,4,4a,5,6,7-Hexahydro-4a,8-dimethyl-2(1H	CC(=O)OCC(=C1CCC2(C)CCCC(=C2C1)C)COC(=O)C	C19H28O4	320.423	KNApSAcK
(-)-Coriolin Coriolin	CC1(C)CC2C(O)C34OC3C(=O)C5(CO5)C4(C)C2C1O	C15H20O5	280.316	KNApSAcK
(-)-Coronaridine Coronaridine	CCC1CC2CN3CCc4c([nH]c5ccccc45)C(C2)(C13)C(=O)OC	C21H26N2O2	338.443	KNApSAcK
(-)-Corytenchine Corytenchin Corytenchine	COc1cc2CN3CCc4cc(OC)c(OC)cc4C3Cc2cc1O	C20H23NO4	341.401	KNApSAcK
(-)-CP 263,114 (-)-Phomoidride B CP 263114 CP-263,114 Phomoidride B	C\C=C\CCCCCC1C=C2C3(CC(=O)O)CC4=C(C5C1CC(OC25OC3=O)C(=O)CC\C=C\C)C(=O)OC4=O	C31H36O9	552.612	KNApSAcK
(-)-Craspidospermine 11-Methoxycriocerine Craspidospermine	CCC12CC3(OC1C=CN4CCc5c(C24)n3c6cc(OC)ccc56)C(=O)OC	C22H24N2O4	380.437	KNApSAcK
(-)-Crebanine Crebanin	COc1ccc2c(CC3N(C)CCc4cc5OCOc5c2c34)c1OC	C20H21NO4	339.385	KNApSAcK
(-)-Criocerine Criocerine	CCC12CC3(OC1C=CN4CCc5c(C24)n3c6ccccc56)C(=O)OC	C21H22N2O3	350.411	KNApSAcK
(-)-Cryptomerione (R)-Cryptomerione	CC(=CCCC(=C)C1CC=C(C)C(=O)C1)C	C15H22O	218.335	KNApSAcK
(-)-Cryptopleurine Cryptopleurine	COc1ccc2c3CN4CCCCC4Cc3c5cc(OC)c(OC)cc5c2c1	C24H27NO3	377.476	KNApSAcK
(-)-Cryptoresinol	OCC1OC(C=C1c2ccc(O)cc2)c3ccc(O)cc3	C17H16O4	284.307	KNApSAcK
(-)-Cuanzine	COC(=O)C1(O)CC23CCOC2CCN4CCc5c(C34)n1c6c(OC)cccc56	C22H26N2O5	398.452	KNApSAcK
(-)-Cubebin (8R,8'R,9S)-Cubebin beta-Cubebin (-)-beta-Cubebin	OC1OCC(Cc2ccc3OCOc3c2)C1Cc4ccc5OCOc5c4	C20H20O6	356.369	KNApSAcK
(-)-Cubebinin	COc1cc(CC2COC(O)C2Cc3cc(OC)c(OC)c(OC)c3)cc(OC)c1OC	C24H32O8	448.506	KNApSAcK
(-)-Cudraflavone A	CC(=CC1Oc2cc(O)ccc2C3=C1C(=O)c4c(O)c5C=CC(C)(C)Oc5cc4O3)C	C25H22O6	418.439	KNApSAcK
(-)-Culantraramine	COc1ccc(CCN(C)C)cc1C2CC(=CC(C2C(=C)C)c3cc(CCN(C)C)ccc3OC)C	C32H46N2O2	490.72	KNApSAcK
(-)-Culantraraminol	COc1ccc(CCN(C)C)cc1C2CC(=CC(C2C(C)(C)O)c3cc(CCN(C)C)ccc3OC)C	C32H48N2O3	508.735	KNApSAcK
(-)-Curcuhydroquinone (R)-2-(1,5-Dimethyl-4-hexenyl)-5-methyl-1,4-benzenediol	CC(CCC=C(C)C)c1cc(O)c(C)cc1O	C15H22O2	234.334	KNApSAcK
(-)-Curcuquinone (S)-(-)-Curcuquinone Curcuquinone Deoxyperezone Desoxyperezone	CC(CCC=C(C)C)C1=CC(=O)C(=CC1=O)C	C15H20O2	232.318	KNApSAcK
(-)-Curicycleatjenine	COc1ccc2CC3N(C)CCc4cc5OCOc5c(Oc6ccc(CC7N(CCc8cc(OC)c(Oc1c2)cc78)C(=O)C)cc6)c34	C38H38N2O7	634.718	KNApSAcK
(-)-Curicycleatjine	COc1cc2CCN(C3Cc4ccc(Oc5c6OCOc6cc7CCN(C)C(Cc8ccc(O)c(Oc1cc23)c8)c57)cc4)C(=O)C	C37H36N2O7	620.691	KNApSAcK
(-)-Cyclanoline iodide	COc1ccc2CC3c4cc(O)c(OC)cc4CC[N+]3(C)Cc2c1O	C20H24NO4	342.409	KNApSAcK
(-)-Cycloartocarpin	COc1cc2OC3=C(C(Oc4cc(O)ccc34)C=C(C)C)C(=O)c2c(O)c1\C=C\C(C)C	C26H26O6	434.481	KNApSAcK
(-)-Cycloepoxydon Cycloepoxydon	CCCC1OCC2=C(C1O)C(O)C3OC3C2=O	C12H16O5	240.252	KNApSAcK
(-)-Cyclogalgravin	COc1ccc(cc1OC)C2C(C)C(=Cc3cc(OC)c(OC)cc23)C	C22H26O4	354.439	KNApSAcK
(-)-Cyperenyl acetate	CC1CCC2CC3=C(COC(=O)C)CCC13C2(C)C	C17H26O2	262.387	KNApSAcK
(-)-Cytoxazone Cytoxazone	COc1ccc(cc1)C2NC(=O)OC2CO	C11H13NO4	223.225	KNApSAcK
(-)-Deacetylanisomycin Deacetylanisomycin	COc1ccc(CC2NCC(O)C2O)cc1	C12H17NO3	223.268	KNApSAcK
(-)-Debromoaplysin Debromoaplysin [3S-(3alpha,3abeta,8bbeta)]-2,3,3alpha,8beta-t	CC1CCC2(C)c3ccc(C)cc3OC12C	C15H20O	216.319	KNApSAcK
(-)-Decarbomethoxycuanzine	COc1cccc2c3CCN4CCC5OCCC56CC(O)n(c3C46)c12	C20H24N2O3	340.416	KNApSAcK
(-)-Dechloroisochromophilone IV 8-Acetyldechloroisochromophilone III Dechloroiso	CCC(C)\C=C(/C)\C=C\C1=CC2=CC(=O)C(C)(O)C(OC(=O)C)C2CO1	C21H28O5	360.444	KNApSAcK
(-)-Decipienin F Decipienin F [3S-[3alpha(Z),3aalpha,5aalpha,6alpha,9alpha,9abet	C\C=C(\C)/C(=O)OC1(C)C2CCC3(C)C(O)C=CC(C)(O)C3C2OC1=O	C20H28O6	364.433	KNApSAcK
(-)-delta-Cuparenol (S)-2-Hydroxycuparene delta-Cuparenol Cuparophenol (S)-2-Met	Cc1ccc(cc1O)C2(C)CCCC2(C)C	C15H22O	218.335	KNApSAcK
(-)-delta-Cuprenene delta-Cuprenene delta-Cuprenene [R-(R,S)]-3-Methylene-6-(1,2	CC1(C)CCCC1(C)C2CCC(=C)C=C2	C15H24	204.351	KNApSAcK
(-)-Demethylnorpleiomutine	CCC12CCCN3CCc4c(C13)n(C(C2)c5ccc6NC78CCC9(CCCN%10CCC7(C9%10)c6c5)CC8C(=O)O)c%11ccccc4%11	C39H46N4O2	602.808	KNApSAcK
(-)-Deoxocrispolide	CC12CCC(O)\C(=C\CC3C(OC(=O)C3=C)C1O)\C2	C15H20O4	264.317	KNApSAcK
(-)-Deoxypodorhizone Dihydroanhydropodorhizol (-)-Yatein Yatein	COc1cc(CC2C(Cc3ccc4OCOc4c3)COC2=O)cc(OC)c1OC	C22H24O7	400.422	KNApSAcK
(-)-Detoxin D1 Detoxin D1	CCC(C)C(=O)NC(Cc1ccccc1)C(=O)OC(CC(=O)O)C2C(CCN2C(=O)C(N)C(C)C)OC(=O)C	C28H41N3O8	547.64	KNApSAcK
(-)-Digracine	CN1CCC23C4C(C=CC12OCc5cc6OCOc6cc35)C7C=CC4C89CCN(C)C78OCc%10cc%11OCOc%11cc9%10	C34H34N2O6	566.644	KNApSAcK
(-)-Dihydroclusin	COc1cc(CC(CO)C(CO)Cc2ccc3OCOc3c2)cc(OC)c1OC	C22H28O7	404.454	KNApSAcK
(-)-Dihydroflustramine C	CN1CCC2(C1Nc3cc(Br)ccc23)C(C)(C)C=C	C16H21BrN2	321.255	KNApSAcK
(-)-Dihydroguaiaretic acid	COc1cc(CC(C)C(C)Cc2ccc(O)c(OC)c2)ccc1O	C20H26O4	330.418	KNApSAcK
(-)-Diolmycin A1 Diolmycin A 1	OC(Cc1ccc(O)cc1)C(O)Cc2c[nH]c3ccccc23	C18H19NO3	297.348	KNApSAcK
(-)-Diplophyllin Diplophyllin [3aS-(3aalpha,8abeta,9aalpha)]-3a,4,6,7,8,8a,9,9a-	CC1=C2CC3C(CC2(C)CCC1)OC(=O)C3=C	C15H20O2	232.318	KNApSAcK
(-)-Discretine Discretine	COc1cc2C3Cc4cc(OC)c(OC)cc4CN3CCc2cc1O	C20H23NO4	341.401	KNApSAcK
(-)-Dolabella-3,7,18-triene	CC(=C)C1CCC2(C)C\C=C(/C)\CC\C=C(\C)/CCC12	C20H32	272.468	KNApSAcK
(-)-Dragmacidin E Dragmacidin E	CC1c2ccc(O)c3[nH]cc(C4=C(N=C(C(=O)N4)c5c[nH]c6cc(Br)ccc56)C17CN=C(N)N7)c23	C25H20BrN7O2	530.376	KNApSAcK
(-)-Echitoveniline	COC(=O)C1=C2Nc3ccccc3C24CCN5CCCC(C1)(C(C)OC(=O)c6cc(OC)c(OC)c(OC)c6)C45	C31H36N2O7	548.627	KNApSAcK
(-)-Edulinine (S)-(-)-Edulinine	COC1=C(CC(O)C(C)(C)O)C(=O)N(C)c2ccccc12	C16H21NO4	291.342	KNApSAcK
(-)-EI 1941-1 EI 1941-1	CCCC1CC2=C(C(O)O1)C(O)C3OC3C2=O	C12H16O5	240.252	KNApSAcK
(-)-EI 1941-2 EI 1941-2	CCCC1CC2=C(C(O)C3OC3C2=O)C(=O)O1	C12H14O5	238.237	KNApSAcK
(-)-EI 1941-3 EI 1941-3	CCCC1CC2=C(C(O)C(O)CC2=O)C(=O)O1	C12H16O5	240.252	KNApSAcK
(-)-ent-Isolariciresinol	COc1cc2CC(CO)C(CO)C(c3ccc(O)c(OC)c3)c2cc1O	C20H24O6	360.401	KNApSAcK
(-)-ent-Spathulenol beta-Spathulenol ent-Spathulenol	CC1(C)C2CCC(=C)C3CCC(C)(O)C3C12	C15H24O	220.35	KNApSAcK
(-)-Enterodiol	OCC(Cc1cccc(O)c1)C(CO)Cc2cccc(O)c2	C18H22O4	302.365	KNApSAcK
(-)-Eperuic acid	CC(CCC1C(=C)CCC2C(C)(C)CCCC12C)CC(=O)O	C20H34O2	306.483	KNApSAcK
(-)-Epiafzelechin 7-O-beta-D-glucopyranoside Symposide	OCC1OC(Oc2cc(O)c3CC(O)C(Oc3c2)c4ccc(O)cc4)C(O)C(O)C1O	C21H24O10	436.409	KNApSAcK
(-)-Epicatechin 3-O-gallate (-)-Epicatechin gallate	Oc1cc(O)c2CC(OC(=O)c3cc(O)c(O)c(O)c3)C(Oc2c1)c4ccc(O)c(O)c4	C22H18O10	442.372	KNApSAcK
(-)-Epicatechin 5-O-beta-D-xylopyranoside (-)-(-)-Epicatechin 5-O-beta-D-xylopyr	OC1COC(Oc2cc(O)cc3OC(C(O)Cc23)c4ccc(O)c(O)c4)C(O)C1O	C20H22O10	422.383	KNApSAcK
(-)-Epilaurene (1R-trans)-1-(1,2-Dimethyl-3-methylenecyclopentyl)-4-methylbenzen	CC1C(=C)CCC1(C)c2ccc(C)cc2	C15H20	200.319	KNApSAcK
(-)-Epingaione	CC(C)CC(=O)CC1(C)CCC(O1)c2cocc2	C15H22O3	250.333	KNApSAcK
(-)-Epipolasin A	CC12CCCC(C)(N=C=S)C1C3C(CC2)C3(C)C	C16H25NS	263.441	KNApSAcK
(-)-Epistephanine	COc1ccc2CC3N(C)CCc4cc(OC)c(Oc5c(OC)c(OC)cc6CCN=C(Cc7ccc(Oc1c2)cc7)c56)cc34	C37H38N2O6	606.707	KNApSAcK
(-)-epsilon-Bulgarene	CC(C)C1CCC(=C)C2CCC(=C)CC12	C15H24	204.351	KNApSAcK
(-)-Eriolanin Eriolanin [3aalpha,4alpha,5(S),7aalpha]-(-)- 2,3,3a,4,7,7a-Hexahyd	CC(CCCO)C1=C(CO)CC2OC(=O)C(=C)C2C1OC(=O)C(=C)C	C19H26O6	350.406	KNApSAcK
(-)-Eschscholtzine Californin Californine Crychin Crychine Eschscholtzin	CN1C2Cc3cc4OCOc4cc3C1Cc5cc6OCOc6cc25	C19H17NO4	323.343	KNApSAcK
(-)-Etharvensin	CCOC1CC(=O)OC2C(O)C(OC12)c3ccccc3	C15H18O5	278.3	KNApSAcK
(-)-Eudeshonokiol Eudeshonokiol Eudeshonokiol A	CC(C)(O)C1CCC2(C)CCCC(C)(Oc3ccc(cc3CC=C)c4cc(CC=C)ccc4O)C2C1	C33H44O3	488.701	KNApSAcK
(-)-Eudesm-7(11)-en-4alpha-ol Juniper camphor	CC(=C1CCC2(C)CCCC(C)(O)C2C1)C	C15H26O	222.366	KNApSAcK
(-)-Eudesma-1,4(15),11-triene	CC(=C)C1CCC2(C)C=CCC(=C)C2C1	C15H22	202.335	KNApSAcK
(-)-Eudesma-2,4(15)-11-triene	CC(=C)C1CCC2(C)CC=CC(=C)C2C1	C15H22	202.335	KNApSAcK
(-)-Eudesma-3,11-dien-5-ol	CC(=C)C1CCC2(C)CCC=C(C)C2(O)C1	C15H24O	220.35	KNApSAcK
(-)-Eudesmagnolol Eudesmagnolol [2R-(2alpha,4aalpha,8beta,8abeta)]-Decahydro-8-[	CC(C)(O)C1CCC2(C)CCCC(C)(Oc3ccc(CC=C)cc3c4cc(CC=C)ccc4O)C2C1	C33H44O3	488.701	KNApSAcK
(-)-Fargesol	COc1ccc(cc1OC)C(O)C2COC(C2CO)c3ccc(OC)c(OC)c3	C22H28O7	404.454	KNApSAcK
(-)-Farrerol Farrerol	Cc1c(O)c(C)c2OC(CC(=O)c2c1O)c3ccc(O)cc3	C17H16O5	300.306	KNApSAcK
(-)-Fiscalin B Fiscalin B	CC(C)C1NC(=O)C(Cc2c[nH]c3ccccc23)N4C(=O)c5ccccc5N=C14	C23H22N4O2	386.446	KNApSAcK
(-)-Flexicorine	COC(=O)C1C2CCC34N=C5C=C(C(=O)C=C5C13CCN4C/C/2=C/C)c6cc7c(cc6OC)N(C)C8C9CC%10C%11C(CC78C%11=O)N9C/C/%10=C/C	C41H44N4O5	672.812	KNApSAcK
(-)-Floridine	CC(OC(=O)C)C(O)(C(=O)OCC1CCN2CCCC12)C(C)(C)O	C17H29NO6	343.415	KNApSAcK
(-)-Floridinine	CC(O)C(O)(C(=O)OCC1CCN2CCCC12)C(C)(C)O	C15H27NO5	301.379	KNApSAcK
(-)-FR 65814 FR 65814	CC(=CCC1OC1(C)C2C(O)C(O)CCC23CO3)C	C15H24O4	268.349	KNApSAcK
(-)-Fuchsiaefolin (-)-Fuchsiaefoline	CCOC(=O)C1C2CC3c4c(CC1[N+]3(C)C/C/2=C/C)c5cccc(OC)c5n4C	C24H31N2O3	395.515	KNApSAcK
(-)-Fumagillin Amebacilin Fugillin Fumadil B Fumagillin Fumagillin DCH Fumidil	COC1C(CCC2(CO2)C1C3(C)OC3CC=C(C)C)OC(=O)\C=C\C=C\C=C\C=C\C(=O)O	C26H34O7	458.544	KNApSAcK
(-)-Fumagillol FOS 37 Fumagillol	COC1C(O)CCC2(CO2)C1C3(C)OC3CC=C(C)C	C16H26O4	282.375	KNApSAcK
(-)-Fumiquinazoline H	CC(C)CC1NC2N(C1=O)c3ccccc3C24CC5N6C(=O)c7ccccc7N=C6C(C)(NC5=O)O4	C27H27N5O4	485.534	KNApSAcK
(-)-Furaquinocin A Furaquinocin A	COC1=C(C)C(=O)c2c3OC(C)C(C)(C(O)C\C=C(\C)/CO)c3c(O)cc2C1=O	C22H26O7	402.438	KNApSAcK
(-)-Furaquinocin C Furaquinocin C KO 3988C	COC1=C(C)C(=O)c2c3OC(C)C(C)(CCC=C(C)C)c3c(O)cc2C1=O	C22H26O5	370.439	KNApSAcK
(-)-Furaquinocin D Furaquinocin D KO 3988D	COC1=C(C)C(=O)c2c3OC(C)C(C)(C(O)CC=C(C)C)c3c(O)cc2C1=O	C22H26O6	386.438	KNApSAcK
(-)-Furaquinocin E Furaquinocin E KO 3988E	COC1=C(C)C(=O)c2c3OC(C)C(C)(\C=C\C=C(/C)\CO)c3c(O)cc2C1=O	C22H24O6	384.422	KNApSAcK
(-)-Furaquinocin F Furaquinocin F KO 3988F	COC1=C(C)C(=O)c2c3OC(C)C(C)(CC\C=C(/C)\CO)c3c(O)cc2C1=O	C22H26O6	386.438	KNApSAcK
(-)-Furaquinocin H Furaquinocin H KO 3988H	COC1=C(C)C(=O)c2c3OC(C)C(C)(C(O)CC=C(CO)CO)c3c(O)cc2C1=O	C22H26O8	418.437	KNApSAcK
(-)-Galipinine Allocuspareine	CN1C(CCc2ccc3OCOc3c2)CCc4ccccc14	C19H21NO2	295.376	KNApSAcK
(-)-gamma-Cadinene	CC(C)C1CCC(=C)C2CCC(=CC12)C	C15H24	204.351	KNApSAcK
(-)-gamma-Elemene gamma-Elemene	CC(=C1CCC(C)(C=C)C(C1)C(=C)C)C	C15H24	204.351	KNApSAcK
(-)-gamma-Herbertenol	Cc1cc(O)cc(c1)C2(C)CCCC2(C)C	C15H22O	218.335	KNApSAcK
(-)-Gancaonin K Gancaonin K	Oc1ccc(cc1)C(=O)C2COc3cc(O)ccc3C2=O	C16H12O5	284.263	KNApSAcK
(-)-Ganoderic acid Ma 3alpha,7alpha-Diacetoxy-15alpha-hydroxy-5alpha-lanosta-8,2	CC(CC\C=C(/C)\C(=O)O)C1CC(O)C2(C)C3=C(CCC12C)C4(C)CCC(OC(=O)C)C(C)(C)C4CC3OC(=O)C	C34H52O7	572.772	KNApSAcK
(-)-Ganoderic acid Mb 3alpha,15alpha,22-Triacetoxy-7alpha-hydroxy-5alpha-lanosta	CC(C(C\C=C(/C)\C(=O)O)OC(=O)C)C1CC(OC(=O)C)C2(C)C3=C(CCC12C)C4(C)CCC(OC(=O)C)C(C)(C)C4CC3O	C36H54O9	630.809	KNApSAcK
(-)-Ganoderic acid Mc 3alpha,7alpha,22-Triacetoxy-15alpha-hydroxy-5alpha-lanosta	CC(C(C\C=C(/C)\C(=O)O)OC(=O)C)C1CC(O)C2(C)C3=C(CCC12C)C4(C)CCC(OC(=O)C)C(C)(C)C4CC3OC(=O)C	C36H54O9	630.809	KNApSAcK
(-)-Ganoderic acid Md 3alpha,22-Diacetoxy-7alpha-methoxy-5alpha-lanosta-8,24E-di	CC(C(C\C=C(/C)\C(=O)O)OC(=O)C)C1CCC2(C)C3=C(CCC12C)C4(C)CCC(OC(=O)C)C(C)(C)C4CC3OC(=O)C	C36H54O8	614.809	KNApSAcK
(-)-Ganoderic acid Me 3alpha,15alpha-Diacetoxy-5alpha-lanosta-7,9(11),24E-trien-	CC(CC\C=C(/C)\C(=O)O)C1CC(OC(=O)C)C2(C)C3=CCC4C(C)(C)C(CCC4(C)C3=CCC12C)OC(=O)C	C34H50O6	554.757	KNApSAcK
(-)-Geosmin Geosmin [4S-(4alpha,4aalpha,8abeta)]-Octahydro-4,8a-dimethyl-4a(2H)-	CC1CCCC2(C)CCCCC12O	C12H22O	182.302	KNApSAcK
(-)-Glaucine	COc1cc2CC3N(C)CCc4cc(OC)c(OC)c(c2cc1OC)c34	C21H25NO4	355.427	KNApSAcK
(-)-Glyceollin I	CC1(C)Oc2ccc3C4Oc5cc(O)ccc5C4(O)COc3c2C=C1	C20H18O5	338.354	KNApSAcK
(-)-Glyceollin II	CC1(C)Oc2cc3OCC4(O)C(Oc5cc(O)ccc45)c3cc2C=C1	C20H18O5	338.354	KNApSAcK
(-)-Glycinol 3,6a,9-Trihydroxypterocarpan	Oc1ccc2C3Oc4cc(O)ccc4C3(O)COc2c1	C15H12O5	272.253	KNApSAcK
(-)-Gomisin J	COc1c(O)cc2CC(C)C(C)Cc3cc(O)c(OC)c(OC)c3c2c1OC	C22H28O6	388.454	KNApSAcK
(-)-Govadine	COc1cc2CC3N(CCc4cc(OC)c(O)cc34)Cc2cc1O	C19H21NO4	327.374	KNApSAcK
(-)-Govanine	COc1cc2CCN3Cc4cc(OC)c(OC)cc4CC3c2cc1O	C20H23NO4	341.401	KNApSAcK
(-)-Gypsetin Gypsetin Gypsetine	CC(C)(C=C)C12Nc3ccccc3C1(O)CC4N2C(=O)C5CC6(O)c7ccccc7NC6(N5C4=O)C(C)(C)C=C	C32H36N4O4	540.653	KNApSAcK
(-)-Haplomyrfolin Haplomyrfolin	COc1cc(CC2COC(=O)C2Cc3ccc4OCOc4c3)ccc1O	C20H20O6	356.369	KNApSAcK
(-)-Hazuntine Hazuntine (-)-Lochnerinine	CCC12CC(=C3Nc4cc(OC)ccc4C35CCN(CC6OC16)C25)C(=O)OC	C22H26N2O4	382.453	KNApSAcK
(-)-Helenium lactone	CC1=CC2OC(=O)C(=C)C2CC3C1CCC3(C)O	C15H20O3	248.317	KNApSAcK
(-)-Heliangolide Heliangolide	C\C\1=C/CC(O)\C(=C/C2OC(=O)C(=C)C2CC1)\C	C15H20O3	248.317	KNApSAcK
(-)-Helicascolide A	C\C=C(/C)\C1OC(=O)C(C)(C)C(O)C1C	C12H20O3	212.285	KNApSAcK
(-)-Herbertene (-)-Isocuparene Herbertene Isocuparene (S)-1-Methyl-3-(1,2,2-trim	Cc1cccc(c1)C2(C)CCCC2(C)C	C15H22	202.335	KNApSAcK
(-)-Herbertene-1,12-diol	CC1(C)CCCC1(C)c2cc(O)cc(CO)c2	C15H22O2	234.334	KNApSAcK
(-)-Herbertenediol Herbertenediol(S)-5-Methyl-3-(1,2,2-trimethylcyclopentyl)-1,2	Cc1cc(O)c(O)c(c1)C2(C)CCCC2(C)C	C15H22O2	234.334	KNApSAcK
(-)-Hibalactone (-)-Savinin Savinin	O=C1OCC(Cc2ccc3OCOc3c2)/C/1=C\c4ccc5OCOc5c4	C20H16O6	352.337	KNApSAcK
(-)-Hispidospermidin Hispidospermidin	CC1CCC2C3(C)OC4(C)CCC12CC4C3NCCCCN(C)CCCN(C)C	C25H47N3O	405.66	KNApSAcK
(-)-Holostyligone	COc1cc(ccc1O)C2C(C)C(C)C(=O)c3cc(OC)c(OC)cc23	C21H24O5	356.412	KNApSAcK
(-)-Homopterocarpin Baphinitone 3,9-Dimethoxypterocarpan	COc1ccc2C3Oc4cc(OC)ccc4C3COc2c1	C17H16O4	284.307	KNApSAcK
(-)-Hongconin	COc1cccc2c(O)c3C(=O)C(C)OC(C)c3c(O)c12	C16H16O5	288.295	KNApSAcK
(-)-Hydroxyperezone 6-Hydroxyperezone Hydroxyperezone	CC(CCC=C(C)C)C1=C(O)C(=O)C(=C(O)C1=O)C	C15H20O4	264.317	KNApSAcK
(-)-Hydroxysugiresinol Sequirin B	OC1COC(CC1c2ccc(O)c(O)c2)c3ccc(O)cc3	C17H18O5	302.322	KNApSAcK
(-)-Hygroline	CC(O)CC1CCCN1C	C8H17NO	143.227	KNApSAcK
(-)-Ichthyotherminolide Ichthyotherminolide	COC(=O)\C\1=C\C2(O)OC(C3OC(=O)C(=C)C3C(OC(=O)\C(=C\C)\C)C1OC(=O)C)C(=C2)C	C23H26O10	462.447	KNApSAcK
(-)-Idiospermuline Idiospermuline	CN1CCC2(C1Nc3c(cccc23)C45CCN(C)C4N(C)c6ccccc56)C78CCN(C)C7N(C)c9ccccc89	C35H42N6	546.748	KNApSAcK
(-)-Indocarbazostatin B Indocarbazostatin B	CCOC(=O)C1(O)CC2OC1(C)n3c4ccc(O)c(N)c4c5c6C(=O)NC(=O)c6c7c8ccccc8n2c7c35	C28H22N4O7	526.497	KNApSAcK
(-)-Indolactam-V Indolactam V	CC(C)C1N(C)c2cccc3[nH]cc(CC(CO)NC1=O)c23	C17H23N3O2	301.383	KNApSAcK
(-)-Iodanthine	CC1C\C(=C\C(=O)OC2CCN3CCC(COC(=O)C1(C)O)C23)\C	C18H27NO5	337.411	KNApSAcK
(-)-Isishippuric acid A	CC1CCC2C(CC(=O)O)C1(CC2(C)C)C(=O)C	C15H24O3	252.349	KNApSAcK
(-)-Isocaryachine N-oxide	COc1cc2C3Cc4cc5OCOc5cc4C(Cc2cc1O)N3(=O)C	C19H19NO5	341.358	KNApSAcK
(-)-Isocelorbicol Isocelorbicol [3R-(3alpha,5beta,5aalpha,6alpha,7alpha,9alpha,9	CC1CC(O)C(O)C2(C)C(O)CC3CC12OC3(C)C	C15H26O4	270.365	KNApSAcK
(-)-Isochaminic acid	CC1(C)C2CCC(=CC12)C(=O)O	C10H14O2	166.217	KNApSAcK
(-)-Isocoreximine	COc1cc2CN3CCc4cc(O)c(OC)cc4C3Cc2cc1O	C19H21NO4	327.374	KNApSAcK
(-)-Isocorydine	COc1ccc2CC3N(C)CCc4cc(OC)c(OC)c(c34)c2c1O	C20H23NO4	341.401	KNApSAcK
(-)-Isocyclocapitelline Isocyclocapitelline	CC(C)(O)C1CCC(C)(Cc2nccc3c4ccccc4[nH]c23)O1	C20H24N2O2	324.417	KNApSAcK
(-)-Isogallicadiol Isogallicadiol [3S-(3alpha,3aalpha,5abeta,6beta,9abeta,9bbeta	CC1C2CCC3(C)C(O)CCC(=C)C3(O)C2OC1=O	C15H22O4	266.333	KNApSAcK
(-)-Isolariciresinol 4-O-beta-D-glucopyranoside	COc1cc(CC(CO)C(CO)Cc2ccc(OC3OC(CO)C(O)C(O)C3O)c(OC)c2)ccc1O	C26H36O11	524.557	KNApSAcK
(-)-Isolasolide Isolasolide [3S-[3alpha(Z),3aalpha,5aalpha,6alpha,9abeta,9balpha	C\C=C(\C)/C(=O)OC1(C)C2CCC3(C)C(O)CC=C(C)C3C2OC1=O	C20H28O5	348.433	KNApSAcK
(-)-Isolaureline	COc1ccc2c(CC3N(C)CCc4cc5OCOc5c2c34)c1	C19H19NO3	309.359	KNApSAcK
(-)-Isolonchocarpin	CC1(C)Oc2ccc3C(=O)CC(Oc3c2C=C1)c4ccccc4	C20H18O3	306.355	KNApSAcK
(-)-Isonorargemonine Isonorargemonine	COc1cc2C3Cc4cc(OC)c(OC)cc4C(Cc2cc1O)N3C	C20H23NO4	341.401	KNApSAcK
(-)-Isopanduratin A	COc1cc(O)cc(O)c1C(=O)C2CC(C=C(C)C2CC=C(C)C)c3ccccc3	C26H30O4	406.514	KNApSAcK
(-)-Isopinocamphone	CC1C2CC(CC1=O)C2(C)C	C10H16O	152.233	KNApSAcK
(-)-Isopsiadiol	CC1(C)C(O)CCC2(C)C(CCc3cocc3)C(=C)CC(O)C12	C20H30O3	318.45	KNApSAcK
(-)-Isoschizogaline Isoschizogaline	COc1ccc2C3CCN4CC=CC56CCC3C45N(C(=O)C6)c2c1	C20H22N2O2	322.401	KNApSAcK
(-)-Isoschizogamine Isoschizogamine	COc1cc2C3CCN4CC=CC56CCC3C45N(C(=O)C6)c2cc1OC	C21H24N2O3	352.427	KNApSAcK
(-)-Isoscoparin	COc1cc(ccc1O)C2=CC(=O)c3c(O)c(C4OC(CO)C(O)C(O)C4O)c(O)cc3O2	C22H22O11	462.403	KNApSAcK
(-)-Isotecleoxine	COc1cc2c(OC)c3ccoc3nc2cc1OCC4OC4(C)C	C18H19NO5	329.347	KNApSAcK
(-)-Isovalerylmarmesin	CCC(C)C(=O)OC(C)(C)C1Cc2cc3C=CC(=O)Oc3cc2O1	C19H22O5	330.375	KNApSAcK
(-)-Ixerin A Ixerin A	CC1C2CC\C(=C/CC\C(=C\C2OC1=O)\CO)\C=O	C15H20O4	264.317	KNApSAcK
(-)-Ixerin B Ixerin B	OCC1OC(OC\C\2=C\C3OC(=O)C(=C)C3CC\C(=C/CC2)\C=O)C(O)C(O)C1O	C21H28O9	424.442	KNApSAcK
(-)-Ixerin J Ixerin J	CC1C2CC\C(=C/CC\C(=C/C2OC1=O)\COC3OC(CO)C(O)C(O)C3O)\C=O	C21H30O9	426.457	KNApSAcK
(-)-Jinkoheremol Jinkoheremol	CC1CCCC2=CCC(CC12C)C(C)(C)O	C15H26O	222.366	KNApSAcK
(-)-Kablicin Kablicin Kablicine	C\C=C(/C)\C(=O)OC1C2CCC(O)C(C)C2(C)C(OC(=O)C=C(C)C)c3c(C)coc13	C25H34O6	430.534	KNApSAcK
(-)-Kaur-16-en-19-ol Candol B Ent-18-Hydroxykaur-16-ene	CC1(CO)CCCC2(C)C1CCC34CC(CCC23)C(=C)C4	C20H32O	288.467	KNApSAcK
(-)-Khusol Cadina-4,10(15)-dien-12-ol	CC(CO)C1CCC(=C)C2CCC(=CC12)C	C15H24O	220.35	KNApSAcK
(-)-Kikemanine Kikemanin Kikemanine Schefferine (-)-Corydalmine Corydalmine	COc1cc2CCN3Cc4c(CC3c2cc1OC)ccc(O)c4OC	C20H23NO4	341.401	KNApSAcK
(-)-Kindon ketol Kindon ketol	CC(C)CC(=O)C1C(C)CCC1(O)c2cocc2	C15H22O3	250.333	KNApSAcK
(-)-Kopsinine Kopsinine	COC(=O)C1CC23CCCN4CCC5(C24)c6ccccc6NC15CC3	C21H26N2O2	338.443	KNApSAcK
(-)-Kopsininic acid	OC(=O)C1CC23CCCN4CCC5(C24)c6ccccc6NC15CC3	C20H24N2O2	324.417	KNApSAcK
(-)-Kusunokinin Kusunokinin	COc1ccc(CC2COC(=O)C2Cc3ccc4OCOc4c3)cc1OC	C21H22O6	370.396	KNApSAcK
(-)-Lankacidin C Antibiotic T 2636C Bundlin A Lankacidin C NSC 145118 T 2636C	CC1C2CC(O)\C=C\C(=C\CC(O)\C=C\C(=C\C(NC(=O)C(=O)C)C(C)(C(=O)O2)C1=O)\C)\C	C25H33NO7	459.532	KNApSAcK
(-)-Lapidilectine A	COC(=O)C1CC23CCC14N(C(=O)OC)c5ccccc5C4(CCN2CC=C3)C(=O)OC	C24H28N2O6	440.489	KNApSAcK
(-)-Ledene ent-Ledene (-)-Leden	CC1CCC2=C(C)CCC3C(C12)C3(C)C	C15H24	204.351	KNApSAcK
(-)-Licarin A Licarin A	COc1cc(ccc1O)C2Oc3c(OC)cc(\C=C\C)cc3C2C	C20H22O4	326.386	KNApSAcK
(-)-Ligularenolide Ligularenolid Ligularenolide	CC1CCC=C2C=C3OC(=O)C(=C3CC12C)C	C15H18O2	230.302	KNApSAcK
(-)-Limacine 2'-alpha-N-oxide	COc1ccc2CC3N(C)CCc4cc(OC)c(O)c(Oc5cc6C(Cc7ccc(Oc1c2)cc7)N(=O)(C)CCc6cc5OC)c34	C37H40N2O7	624.723	KNApSAcK
(-)-Limacine, 2-beta-N-oxide	COc1ccc2CC3c4c(CCN3(=O)C)cc(OC)c(O)c4Oc5cc6C(Cc7ccc(Oc1c2)cc7)N(C)CCc6cc5OC	C37H40N2O7	624.723	KNApSAcK
(-)-Lindenene (4aS,5aS,6aR,6bS)-4,4a,5,5a,6,6a,6b,7-Octahydro-3,6b-dimethyl-5-me	Cc1coc2CC3(C)C4CC4C(=C)C3Cc12	C15H18O	214.303	KNApSAcK
(-)-Linderol A Linderol A	CCCC1CCC(C)(O)C2Oc3c(C12)c(OC)cc(O)c3C(=O)\C=C\c4ccccc4	C26H30O5	422.513	KNApSAcK
(-)-Lirinidine	COc1cc2CCN(C)C3Cc4ccccc4c(c1O)c23	C18H19NO2	281.349	KNApSAcK
(-)-Lobeline Lobeline	CN1C(CC(O)c2ccccc2)CCCC1CC(=O)c3ccccc3	C22H27NO2	337.455	KNApSAcK
(-)-Longiborneol	CC1(C)CCCC2(C)C3CCC2(C)C(O)C13	C15H26O	222.366	KNApSAcK
(-)-Longifolene	CC1(C)CCCC2(C)C3CCC(C13)C2=C	C15H24	204.351	KNApSAcK
(-)-Luminacin D Luminacin D VD 1207D	CCCC(C1CC(O)C2(OC2CC)C(O)O1)C(=O)c3cc(CC(C)C)c(O)c(C=O)c3O	C24H34O8	450.522	KNApSAcK
(-)-Lychnopholide Lychnopholide	C\C=C(\C)/C(=O)OC1CC2(C)OC(=CC2=O)\C(=C/C3OC(=O)C(=C)C13)\C	C20H22O6	358.385	KNApSAcK
(-)-Maackiain 3-sulfate	OS(=O)(=O)Oc1ccc2C3Oc4cc5OCOc5cc4C3COc2c1	C16H12O8S	364.327	KNApSAcK
(-)-Maalioxide Ventricosin B	CC12CCCC3C1C(C)(CCC2)OC3(C)C	C15H26O	222.366	KNApSAcK
(-)-Machilusin	COc1ccc(cc1OC)C2OC(C(C)C2C)c3ccc4OCOc4c3	C21H24O5	356.412	KNApSAcK
(-)-Majoridine	COc1ccc2N(C)C3C4CC5C6C(CC3(C6OC(=O)C)c2c1)N4C/C/5=C/C	C23H28N2O3	380.48	KNApSAcK
(-)-Malbranicin Malbranicin	COC1=CC(=O)C=C(C(C)C(=O)C)C1=O	C11H12O4	208.211	KNApSAcK
(-)-Malkangunin Malkangunin Malkanguniol 4-acetate 5-benzoate [3S-(3alpha,4beta,	CC1CCC(O)C2(CO)C(CC3C(OC(=O)C)C12OC3(C)C)OC(=O)c4ccccc4	C24H32O7	432.507	KNApSAcK
(-)-Marshmine	COc1cc(O)c2C(=O)c3cccc(O)c3N(C)c2c1CC(O)C(=C)C	C20H21NO5	355.384	KNApSAcK
(-)-Massoniresinol 4'-O-beta-D-glucopyranoside	COc1cc(CC2(O)COC(c3ccc(OC4OC(CO)C(O)C(O)C4O)c(OC)c3)C2(O)CO)ccc1O	C26H34O13	554.54	KNApSAcK
(-)-Megaphone	COC1CC(CC=C)(C(C)C(O)c2cc(OC)c(OC)c(OC)c2)C(=O)C=C1	C22H30O6	390.47	KNApSAcK
(-)-Menthofuran oxide d-Menthofuranoxide	CC1CCC2=C(C)C(=O)OC2(O)C1	C10H14O3	182.216	KNApSAcK
(-)-Merulidial Merulidial	CC1(C)CC2C(O)C3(C)CC3(C=O)C(=C2C1)C=O	C15H20O3	248.317	KNApSAcK
(-)-Mesembrine Mesembrine	COc1ccc(cc1OC)C23CCN(C)C2CC(=O)CC3	C17H23NO3	289.369	KNApSAcK
(-)-Methyl 16-hydroxy-19-nor-2-oxo-cis-cleroda-3,13-dien-15,16-olide-20-oate	COC(=O)C1(CCC2=CC(=O)OC2O)C(C)CCC3C1CC(=O)C=C3C	C20H26O6	362.417	KNApSAcK
(-)-Methyl asperageigerate	COC(=O)C(=C)C1CC2C(C)CC=C2C3(C)CC13	C16H22O2	246.345	KNApSAcK
(-)-Methylenolactocin Methylenolactocin Methylenolactomycin	CCCCCC1OC(=O)C(=C)C1C(=O)O	C11H16O4	212.242	KNApSAcK
(-)-Mniopetal E Mniopetal E	CC1(C)CC(O)C(O)C23C1CC=C(C=O)C2C(O)OC3=O	C15H20O6	296.316	KNApSAcK
(-)-Mniopetal F Mniopetal F	CC1(C)CCC(O)C23C1CC=C(C=O)C2C(O)OC3=O	C15H20O5	280.316	KNApSAcK
(-)-Monatin	NC(CC(O)(Cc1c[nH]c2ccccc12)C(=O)O)C(=O)O	C14H16N2O5	292.287	KNApSAcK
(-)-Monorden C 6,7-Dihydromonorden A Monorden C	CC1CC2OC2CC\C=C\C(=O)Cc3c(Cl)c(O)cc(O)c3C(=O)O1	C18H19ClO6	366.793	KNApSAcK
(-)-Monorden E Monorden E	CC1C\C=C\CCCCC(=O)Cc2c(Cl)c(O)cc(O)c2C(=O)O1	C18H21ClO5	352.809	KNApSAcK
(-)-Montanine	COC1C=C2C(CC1O)N3CC2c4cc5OCOc5cc4C3	C17H19NO4	301.337	KNApSAcK
(-)-Montrifoline (-)-Nkolbisine Montrifoline Nkolbisine	COc1cc2nc3occc3c(OC)c2cc1OCC(O)C(C)(C)O	C18H21NO6	347.362	KNApSAcK
(-)-Mucroquinone	COC1=CC(=O)C(=CC1=O)C2COc3c(C2)ccc(O)c3OC	C17H16O6	316.305	KNApSAcK
(-)-Munitagine Munitagine	COc1cc2CC3N(C)C(Cc4ccc(OC)c(O)c34)c2cc1O	C19H21NO4	327.374	KNApSAcK
(-)-Myliol Myliol	CC1(C)C2CCC3(C)C4CC(O)C(=C)C34C12	C15H22O	218.335	KNApSAcK
(-)-N,N'-Dimethyllindoldhamine 1'betaH-Berbamunine Dauriciline Guattegaumerine N	COc1cc2CCN(C)C(Cc3ccc(Oc4cc(CC5N(C)CCc6cc(OC)c(O)cc56)ccc4O)cc3)c2cc1O	C36H40N2O6	596.713	KNApSAcK
(-)-N,O-Dimethylthaicanine N,O-Dimethylthaicanine	COc1ccc2CC3c4cc(OC)c(OC)c(OC)c4CC[N+]3(C)Cc2c1OC	C23H30NO5	400.488	KNApSAcK
(-)-N-(2-Oxopyrrolidinomethyl)cytisine	O=C1CCCN1CN2CC3CC(C2)C4=CC=CC(=O)N4C3	C16H21N3O2	287.357	KNApSAcK
(-)-N-Acetylardeemin 5-N-Acetylardeemin N-Acetylardeemin N-Acetylardeemine	CC1N2C(=O)c3ccccc3N=C2C4CC5(C(N4C1=O)N(C(=O)C)c6ccccc56)C(C)(C)C=C	C28H28N4O3	468.547	KNApSAcK
(-)-N-Demethylgalanthamine N-Demethylgalanthamine N-Norgalanthamine Norgalantami	COc1ccc2CNCCC34C=CC(O)CC3Oc1c24	C16H19NO3	273.327	KNApSAcK
(-)-N-Demethyllycoramine	COc1ccc2CNCCC34CCC(O)CC3Oc1c24	C16H21NO3	275.343	KNApSAcK
(-)-N-Formylstepharine	COc1cc2CCN(C=O)C3CC4(C=CC(=O)C=C4)c(c1OC)c23	C19H19NO4	325.358	KNApSAcK
(-)-N-methylcaryachine	COc1cc2C3Cc4cc5OCOc5cc4C(Cc2cc1O)[N+]3(C)C	C20H22NO4	340.393	KNApSAcK
(-)-N-Methylhigenamine N-oxide	CN1(=O)CCc2cc(O)c(O)cc2C1Cc3ccc(O)cc3	C17H19NO4	301.337	KNApSAcK
(-)-N-Methylthaicanine	COc1ccc2CC3c4cc(OC)c(OC)c(O)c4CC[N+]3(C)Cc2c1OC	C22H28NO5	386.461	KNApSAcK
(-)-Neoacrimarine-E	COc1ccc2C(=O)c3c(O)cc(OC)c(C4CC(C)(C)Oc5c4c(O)c6C=CC(=O)Oc6c5C(C)(C)C=C)c3Nc2c1OC	C35H35NO9	613.654	KNApSAcK
(-)-Neoacrimarine-I	COc1cc(O)c2C(=O)c3ccc(OC)c(OC4C(O)C(C)(C)Oc5ccc6C=CC(=O)Oc6c45)c3Nc2c1	C29H25NO9	531.51	KNApSAcK
(-)-Neoacrimarine-J	COc1cc(O)c2C(=O)c3ccc(O)c(OC4C(O)C(C)(C)Oc5ccc6C=CC(=O)Oc6c45)c3Nc2c1	C28H23NO9	517.484	KNApSAcK
(-)-Neolinderatin [1S-[1alpha(1R,6R),6beta]]-3-Phenyl-1-[2,4,6-trihydroxy-3,5-bi	CC(C)C1CCC(=CC1c2c(O)c(C3C=C(C)CCC3C(C)C)c(O)c(C(=O)CCc4ccccc4)c2O)C	C35H46O4	530.737	KNApSAcK
(-)-Nepetaside	CC1COC(=O)C2C(C)C(CC12)OC3OC(CO)C(O)C(O)C3O	C16H26O8	346.373	KNApSAcK
(-)-Neplanocin A Neplanocin A	Nc1ncnc2c1ncn2C3C=C(CO)C(O)C3O	C11H13N5O3	263.253	KNApSAcK
(-)-NFX 2 NFX 2	CCCCCCC1C(O)C(C)OC1=O	C11H20O3	200.275	KNApSAcK
(-)-Nissolin	COc1c(O)ccc2C3COc4cc(O)ccc4C3Oc12	C16H14O5	286.279	KNApSAcK
(-)-Nootkatene Nootkatene	CC1CC=CC2=CCC(CC12C)C(=C)C	C15H22	202.335	KNApSAcK
(-)-Norargemonine Norargemonine O8-Demethylargemonine O2-Demetylargemonie	COc1cc2CC3N(C)C(Cc4cc(OC)c(OC)cc34)c2cc1O	C20H23NO4	341.401	KNApSAcK
(-)-Norboldine	COc1cc2c(CC3NCCc4cc(O)c(OC)c2c34)cc1O	C18H19NO4	313.348	KNApSAcK
(-)-Norchelidonine	OC1Cc2cc3OCOc3cc2C4NCc5c6OCOc6ccc5C14	C19H17NO5	339.342	KNApSAcK
(-)-Norcycleanine O7-Demethylcycleanine	COc1cc2CCN(C)C3Cc4ccc(Oc5c(OC)c(OC)cc6CCN(C)C(Cc7ccc(Oc(c1O)c23)cc7)c56)cc4	C37H40N2O6	608.723	KNApSAcK
(-)-Nortracheloside	COc1cc(CC2COC(=O)C2(O)Cc3ccc(OC4OC(CO)C(O)C(O)C4O)c(OC)c3)ccc1O	C26H32O12	536.525	KNApSAcK
(-)-Nuciferoline (R)-(-)-Nuciferoline	COc1cc2CCN(C)C3Cc4ccc(O)cc4c(c1OC)c23	C19H21NO3	311.375	KNApSAcK
(-)-O-Methylleucotamine O-Methylleucotamine	COc1ccc2CN(C)CCC34C=CC(CC3Oc1c24)OC(=O)CC(C)O	C21H27NO5	373.443	KNApSAcK
(-)-O-Methylstepharinosine	COC1CC(=O)C=CC12CC3NCCc4cc(OC)c(OC)c2c34	C19H23NO4	329.39	KNApSAcK
(-)-Ochracenomicin B Ochracenomicin B	CC1CC2CCC3C(C2C(=O)C1)C(=O)c4cccc(O)c4C3=O	C19H20O4	312.36	KNApSAcK
(-)-Ochracenomicin C Ochracenomicin C	CC1CC(=O)C2C3C(CCC2(O)C1)C(=O)c4c(O)cccc4C3=O	C19H20O5	328.359	KNApSAcK
(-)-Odemasin A (-)-Oudemansin A Oudemansin Oudemansin A	CO\C=C(/C(C)C(OC)\C=C\c1ccccc1)\C(=O)OC	C17H22O4	290.354	KNApSAcK
(-)-OE-Cyclobuxaphylamine (E)-Cyclobuxaphylamine	CNC1CCC23CC24CCC5(C)\C(=C/C)\C(=O)CC5(C)C4=CCC3C1(C)C	C25H37NO	367.567	KNApSAcK
(-)-Olivil Vladinol C	COc1cc(CC2(O)COC(C2CO)c3ccc(O)c(OC)c3)ccc1O	C20H24O7	376.4	KNApSAcK
(-)-Oplodiol Oplodiol [1S-(1alpha,4alpha,4aalpha,8abeta)]-1,2,3,4,4a,5,8,8a-Octa	CC(C)C1=CCC2(C)C(O)CCC(C)(O)C2C1	C15H26O2	238.366	KNApSAcK
(-)-Ormosanine	C1CCC(NC1)C23CC(CC4CCCNC24)C5CCCCN5C3	C20H35N3	317.512	KNApSAcK
(-)-Oudemansin X Oudemansin X	CO\C=C(/C(C)C(OC)\C=C\c1ccc(OC)cc1)\C(=O)OC	C18H24O5	320.38	KNApSAcK
(-)-Ovalicin Graphinone Ovalicin	COC1C(=O)CCC2(CO2)C1(O)C3(C)OC3CC=C(C)C	C16H24O5	296.359	KNApSAcK
(-)-Oxysporidinone	CCC(C)CC(C)\C=C(/C)\C1OC(CCC1C)C2=C(O)C(=CN(C)C2=O)C3(O)CCC(=O)CC3O	C28H43NO6	489.644	KNApSAcK
(-)-p-Menth-1-ene-7,8-diol	CC(C)(O)C1CCC(=CC1)CO	C10H18O2	170.249	KNApSAcK
(-)-Pacifigorgia-1(6),10-diene	CCC(C)C1C(C)CCC2=C1CCC2=C	C15H24	204.351	KNApSAcK
(-)-Pacifigorgia-1(9),10-diene	CC1CCC2C(C)CC=C2C1C=C(C)C	C15H24	204.351	KNApSAcK
(-)-Paeonilactone A Paeonilactone-A	CC1C2CC(=O)C(C)(O)CC2OC1=O	C10H14O4	198.216	KNApSAcK
(-)-Palasonin	CC12C3CCC(O3)C1C(=O)OC2=O	C9H10O4	182.173	KNApSAcK
(-)-Paralycolin A Paralycolin A	CC(=C)C1Cc2ccc(O)c(O)c2c3c(O)c4C=CC(C)(C)Oc4cc13	C22H22O4	350.408	KNApSAcK
(-)-Peduncularine	CC(C)N1C(Cc2c[nH]c3ccccc23)C4CC=CC1C4=C	C20H24N2	292.418	KNApSAcK
(-)-Penlanfuran Penlanfuran	CC(C)C1CCC(=C)C=C1Cc2cocc2	C15H20O	216.319	KNApSAcK
(-)-Pereniporin A Pereniporin A	CC1(C)CCCC2(C)C1C(O)C=C3COC(O)C23O	C15H24O4	268.349	KNApSAcK
(-)-Pereniporin B Pereniporin B	CC1(C)CCCC2(C)C1C(O)C=C3C(=O)OCC23O	C15H22O4	266.333	KNApSAcK
(-)-Perfora-1,7-diene	CC1CC=C(C)C2CCC(=CCC12C)C	C15H24	204.351	KNApSAcK
(-)-Perillup ketol	CC(C)CC1(O)CC(C)CC1C(=O)c2cocc2	C15H22O3	250.333	KNApSAcK
(-)-Phanostenine Phanostenine	COc1cc2CC3N(C)CCc4cc5OCOc5c(c34)c2cc1O	C19H19NO4	325.358	KNApSAcK
(-)-Phaseollin Phaseolin	CC1(C)Oc2ccc3C4COc5cc(O)ccc5C4Oc3c2C=C1	C20H18O4	322.355	KNApSAcK
(-)-Phaseollinisoflavan	CC1(C)Oc2ccc(C3COc4cc(O)ccc4C3)c(O)c2C=C1	C20H20O4	324.37	KNApSAcK
(-)-Phenazinomycin Phenazinomycin	C\C(=C/CN1C2=CC=CC(=O)C2=Nc3ccccc13)\CCC4C(=C)CCCC4(C)C	C27H32N2O	400.556	KNApSAcK
(-)-Phenylahistin	CC(C)(C=C)c1[nH]cnc1\C=C\2/NC(=O)C(Cc3ccccc3)NC2=O	C20H22N4O2	350.414	KNApSAcK
(-)-Phytuberin Phytuberin (3aR,5aS,8R,9aR)-5,5a,6,7,8,9-Hexahydro-a,a,3a,5a-tetr	CC(=O)OC(C)(C)C1CCC2(C)COC3(C)C=COC23C1	C17H26O4	294.386	KNApSAcK
(-)-Pinocampheol	CC1C(O)CC2CC1C2(C)C	C10H18O	154.249	KNApSAcK
(-)-Pinocembrin	Oc1cc(O)c2C(=O)CC(Oc2c1)c3ccccc3	C15H12O4	256.253	KNApSAcK
(-)-Pinoresinol 4-O-beta-D-glucopyranoside (-)-Pinoresinol O-beta-D-glucopyranos	COc1cc(ccc1O)C2OCC3C2COC3c4ccc(OC5OC(CO)C(O)C(O)C5O)c(OC)c4	C26H32O11	520.526	KNApSAcK
(-)-Piperenone	COc1ccc(cc1OC)C2OC3(CC(=O)C(=CC3(OC)C2C)CC=C)OC	C22H28O6	388.454	KNApSAcK
(-)-Platycerine Platycerine	COc1cc2CC3N(C)C(Cc4ccc(OC)c(O)c34)c2cc1OC	C20H23NO4	341.401	KNApSAcK
(-)-Platyphyllide (1R,2R)-(-)-Platyphyllide Platyphyllide (8R-cis)-6,7,8,8a-Tetr	CC(=C)C1CCc2cccc3C(=O)OC1c23	C14H14O2	214.26	KNApSAcK
(-)-Pleiomutine	CCC12CCCN3CCc4c(C13)n(C(C2)c5ccc6N(C)C78CCC9(CCCN%10CCC7(C9%10)c6c5)CC8C(=O)OC)c%11ccccc4%11	C41H50N4O2	630.861	KNApSAcK
(-)-Pluviatolide	COc1cc(CC2C(Cc3ccc4OCOc4c3)COC2=O)ccc1O	C20H20O6	356.369	KNApSAcK
(-)-Podophyllotoxin	COc1cc(cc(OC)c1OC)C2C3C(COC3=O)C(O)c4cc5OCOc5cc24	C22H22O8	414.405	KNApSAcK
(-)-Podorhizol	COc1cc(cc(OC)c1OC)C(O)C2C(Cc3ccc4OCOc4c3)COC2=O	C22H24O8	416.421	KNApSAcK
(-)-Polygodial Polygodial	CC1(C)CCCC2(C)C1CC=C(C=O)C2C=O	C15H22O2	234.334	KNApSAcK
(-)-Prantschimgin	CC(=CC(=O)OC(C)(C)C1Cc2cc3C=CC(=O)Oc3cc2O1)C	C19H20O5	328.359	KNApSAcK
(-)-Pseudophrynaminol Pseudophrynamine 258A	CN1CCC2(C\C=C(/C)\CO)C1Nc3ccccc23	C16H22N2O	258.359	KNApSAcK
(-)-Pseudosemiglabrin Pseudosemiglabrin (7aS,10S,10aR)-10-(Acetyloxy)-7a,9,10,10	CC(=O)OC1C2C(Oc3ccc4C(=O)C=C(Oc4c23)c5ccccc5)OC1(C)C	C23H20O6	392.401	KNApSAcK
(-)-Pseudosemiglabrinol Pseudosemiglabrinol (7aS,10S,10aR)-7a,9,10,10a-Tetrahydr	CC1(C)OC2Oc3ccc4C(=O)C=C(Oc4c3C2C1O)c5ccccc5	C21H18O5	350.365	KNApSAcK
(-)-Pyralomicin 1c Antibiotic MI 178-34F18B2 Pyralomicin 1c	Cc1cc(Cl)c(O)c2C(=O)c3cc(Cl)n(C4C=C(CO)C(O)C(O)C4O)c3Oc12	C19H17Cl2NO7	442.247	KNApSAcK
(-)-Pyridovericin (R)-Pyridovericin Pyridovericin	CCC(CO)\C=C(/C)\C=C\C(=O)C1=C(O)C(=CNC1=O)c2ccc(O)cc2	C21H23NO5	369.411	KNApSAcK
(-)-Pyridoxatin Acremonium BX 86 factor BX 86 Pyridoxatin Pyridoxatine	CC1CC(C)C(C(C1)C=C)C2=C(O)C=CN(O)C2=O	C15H21NO3	263.332	KNApSAcK
(-)-Quebrachamine Kamassine	CCC12CCCN(CCc3c(CC1)[nH]c4ccccc34)C2	C19H26N2	282.423	KNApSAcK
(-)-Rabelomycin Rabelomycin	CC1(O)CC(=O)c2c(C1)cc(O)c3C(=O)c4c(O)cccc4C(=O)c23	C19H14O6	338.311	KNApSAcK
(-)-Radulanin I Radulanin I	CC12COc3cc(CCc4ccccc4)cc(O)c3C1C2	C19H20O2	280.361	KNApSAcK
(-)-Raumacline	CCC1COC(O)C2C3Cc4c(C(CC12)N3)n(C)c5ccccc45	C20H26N2O2	326.433	KNApSAcK
(-)-Rauvomitine	COc1cc(cc(OC)c1OC)C(=O)OC2C3C4CC25C(C6CC3\C(=C/C)\CN46)N(C)c7ccccc57	C30H34N2O5	502.601	KNApSAcK
(-)-Rel-(pR,9S,9'S)-maximowicziol A	OC1CCc2ccc(Oc3cc(CCC(O)C1)ccc3O)cc2	C19H22O4	314.376	KNApSAcK
(-)-Remijinine Remijinine	OCCC1(C2CC3CCN2CC3C=C)C(=O)Nc4ccccc14	C19H24N2O2	312.406	KNApSAcK
(-)-Repandine Repandine N-Methyldemerarine Repandin	COc1cc2CCN(C)C3Cc4ccc(O)c(Oc5ccc(CC6N(C)CCc7cc(OC)c(OC)c(Oc1cc23)c67)cc5)c4	C37H40N2O6	608.723	KNApSAcK
(-)-Reveromycin B Reveromycin B	CCCCC1(CCC2(CCC(C)C(C\C=C(/C)\C=C\C(O)C(C)\C=C\C(=O)O)O2)O1)C(OC(=O)CCC(=O)O)\C=C\C(=C\C(=O)O)\C	C36H52O11	660.791	KNApSAcK
(-)-Ribalinine (S)-(-)-Ribalinine Ribalinine	CN1C2=C(CC(O)C(C)(C)O2)C(=O)c3ccccc13	C15H17NO3	259.3	KNApSAcK
(-)-Roemeroline (R)-Roemeroline N-Methylanolobine Remeroline	CN1CCc2cc3OCOc3c4c5ccc(O)cc5CC1c24	C18H17NO3	295.332	KNApSAcK
(-)-Rotiorin	CCC(C)\C=C(/C)\C=C\C1=CC2=CC3=C(C(=O)C)C(=O)OC3(C)C(=O)C2=CO1	C23H24O5	380.434	KNApSAcK
(-)-Rubiginone C2 Rubiginone C2	COc1cccc2C(=O)c3c(ccc4C(OC(=O)C(C)C)C(C)CC(=O)c34)C(=O)c12	C24H22O6	406.428	KNApSAcK
(-)-S 15183a S 15183a	CCCCCCCC(=O)OC1(C)C(=O)C=C2C=C(CCCCCCC)OC=C2C1=O	C25H36O5	416.55	KNApSAcK
(-)-Saframycin A NSC 325663 Saframycin A	COC1=C(C)C(=O)C2=C(C(CNC(=O)C(=O)C)N3C(C2)C4N(C)C(CC5=C4C(=O)C(=C(C)C5=O)OC)C3C#N)C1=O	C29H30N4O8	562.57	KNApSAcK
(-)-Sakuraresinoside	COc1cc(cc(OC)c1OC(CO)CO)C2Oc3c(OC)cc(CCCO)cc3C2COC4OC(CO)C(O)C(O)C4O	C30H42O14	626.646	KNApSAcK
(-)-Salsoline Salsoline (-)-O7-Methylsalsolinol	COc1cc2C(C)NCCc2cc1O	C11H15NO2	193.242	KNApSAcK
(-)-Salsolinol Salsolinol	CC1NCCc2cc(O)c(O)cc12	C10H13NO2	179.216	KNApSAcK
(-)-Salutaridine Sinoacutine (-)-Sinoacutine	COC1=CC23CCN(C)C(Cc4ccc(OC)c(O)c24)C3=CC1=O	C19H21NO4	327.374	KNApSAcK
(-)-Sanggenone K Sanggenone K (-)-5,7-Dihydroxy-2-[5-hydroxy-2-methyl-2-(4-methy	CC(=CCCC1(C)Oc2c(C=C1)c(O)ccc2C3=C(CC=C(C)C)C(=O)c4c(O)cc(O)cc4O3)C	C30H32O6	488.571	KNApSAcK
(-)-Santhemoidin A Santhemoidin A	CC(=O)OC1C\C=C(/C)\CC(OC(=O)c2cocc2)C3C(OC(=O)C3=C)\C=C/1\C	C22H24O7	400.422	KNApSAcK
(-)-Santhemoidin B Santhemoidin B	COC1OCC(=C1)C(=O)OC2C\C(=C\CC(OC(=O)C)\C(=C/C3OC(=O)C(=C)C23)\C)\C	C23H28O8	432.464	KNApSAcK
(-)-Santiaguine	O=C(C1C(C(C1c2ccccc2)C(=O)N3CCCC(=C3)C4CCCCN4)c5ccccc5)N6CCCC(=C6)C7CCCCN7	C38H48N4O2	592.813	KNApSAcK
(-)-Sarcomycin Sarkomycin A	OC(=O)C1CCC(=O)C1=C	C7H8O3	140.137	KNApSAcK
(-)-Sativene	CC(C)C1CCC2(C)C3CCC(C13)C2=C	C15H24	204.351	KNApSAcK
(-)-Schizogamine	COc1cc2C3CCN4CC=CC56CCC3(C45)N(C(=O)C6)c2cc1OC	C21H24N2O3	352.427	KNApSAcK
(-)-Sclareolide ent-Norambreinolide	CC1(C)CCCC2(C)C1CCC3(C)OC(=O)CC23	C16H26O2	250.376	KNApSAcK
(-)-Secohomoaromoline Secohomoaromoline	COc1ccc(C=O)cc1Oc2ccc(CC3N(C)CCc4cc(OC)c(O)c(Oc5cc6C(=O)N(C)CCc6cc5OC)c34)cc2	C37H38N2O8	638.706	KNApSAcK
(-)-Secojollyanine Secojollyanine	COc1ccc(CO)cc1Oc2ccc(CC3N(C)CCc4cc(OC)c5Oc6cc7CCN(C)C(=O)c7cc6Oc5c34)cc2	C36H36N2O7	608.68	KNApSAcK
(-)-Secoplicamine	COC1CC(N(C)C=O)C2(C=C1)C(=O)N(CCc3ccc(O)cc3)Cc4cc5OCOc5cc24	C26H28N2O6	464.51	KNApSAcK
(-)-Sedamine	CN1CCCCC1CC(O)c2ccccc2	C14H21NO	219.323	KNApSAcK
(-)-Selina-4-11-diene	CC(=C)C1CCC2(C)CCCC(=C2C1)C	C15H24	204.351	KNApSAcK
(-)-Sesquicillin Sesquicillin Sesquicillin A	CC(=CCCC1(C)C(CCC2(C)C(CC3=C(O)C(=C(C)OC3=O)C)C(=C)CCC12)OC(=O)C)C	C29H42O5	470.641	KNApSAcK
(-)-Shizukafuranol Shizukafuranol [4aR-(4aalpha,5alpha,8abeta)]-4,4a,5,6,7,8,8a,	Cc1coc2CC3(C)CCCC(C)(O)C3Cc12	C15H22O2	234.334	KNApSAcK
(-)-Shizukolidol Shizukolidol [4aR-(4aalpha,5alpha,8abeta)]-4a,5,6,7,8,8a-Hexahy	CC1=C2CC3C(C)(O)CCCC3(C)C=C2OC1=O	C15H20O3	248.317	KNApSAcK
(-)-Siccanin Siccanin NSC 135048 Tackle	Cc1cc(O)c2C3OCC45CCCC(C)(C)C4CCC(C)(Oc2c1)C35	C22H30O3	342.472	KNApSAcK
(-)-Simulanol	COc1cc(cc(OC)c1O)C2Oc3c(OC)cc(\C=C\CO)cc3C2CO	C21H24O7	388.411	KNApSAcK
(-)-Sonchuside E Sonchuside E [3aS-(3aalpha,5abeta,6beta,9alpha,9aalpha,9bbeta)]	CC12CCC3C(OC(=O)C3=C)C1C(CCC2OC4OC(CO)C(O)C(O)C4O)C=O	C21H30O9	426.457	KNApSAcK
(-)-Sonchuside F Sonchuside F [3aS-(3aalpha,5abeta,6beta,9alpha,9aalpha,9bbeta)]	CC12CCC3C(OC(=O)C3=C)C1C(CO)CCC2OC4OC(CO)C(O)C(O)C4O	C21H32O9	428.473	KNApSAcK
(-)-Sonchuside G Sonchuside G [3S-(3alpha,3aalpha,5abeta,6beta,9alpha,9aalpha,9b	CC1C2CCC3(C)C(CCC(C=O)C3C2OC1=O)OC4OC(CO)C(O)C(O)C4O	C21H32O9	428.473	KNApSAcK
(-)-Sonchuside H Sonchuside H [3S-(3alpha,3aalpha,5abeta,6beta,9alpha,9aalpha,9b	CC1C2CCC3(C)C(CCC(CO)C3C2OC1=O)OC4OC(CO)C(O)C(O)C4O	C21H34O9	430.489	KNApSAcK
(-)-Sonchuside I Sonchuside I [3S-(3alpha,3aalpha,5abeta,6beta,9alpha,9aalpha,9b	CC1C2CCC3(C)C(O)CCC(COC4OC(CO)C(O)C(O)C4O)C3C2OC1=O	C21H34O9	430.489	KNApSAcK
(-)-Sonderianol	Cc1c(O)cc2c(CCC3C(C)(C)C(=O)CCC23C)c1C=C	C20H26O2	298.419	KNApSAcK
(-)-Sparticarpin	COc1cc2OCC3C(Oc4cc(O)ccc34)c2cc1OC	C17H16O5	300.306	KNApSAcK
(-)-Spirocalcaridine A	COc1ccc(cc1)C2C3(CC4(O)N(C)C(=NC24O)N)C=CC(=O)C=C3	C19H21N3O4	355.388	KNApSAcK
(-)-Spirocalcaridine B	COc1ccc(cc1)C2C3(CC4(O)N(C)C(=NC24OC)N)C=CC(=O)C=C3	C20H23N3O4	369.414	KNApSAcK
(-)-Spirotriprostatin (-)-Spirotryprostatin B Spirotriprostatin Spirotryprostati	CC(=CC1N2C(=O)C3CCCN3C(=O)C2=CC14C(=O)Nc5ccccc45)C	C21H21N3O3	363.41	KNApSAcK
(-)-Steganacin	COc1cc2CC3C(COC3=O)C(OC(=O)C)c4cc5OCOc5cc4c2c(OC)c1OC	C24H24O9	456.442	KNApSAcK
(-)-Stephabinamine Stephabinamine	COc1cc2CN3CCc4cc(OC)c(OC)c(O)c4C3Cc2cc1O	C20H23NO5	357.4	KNApSAcK
(-)-Stephadiolamine beta-N-oxide (-)-4alpha-Hydroxyushinsunine beta-N-oxide	CN1(=O)CC(O)c2cc3OCOc3c4c5ccccc5C(O)C1c24	C18H17NO5	327.331	KNApSAcK
(-)-Stephanine (R)-(-)-Stephanine Stephanine l-Stephanine	COc1cccc2c1CC3N(C)CCc4cc5OCOc5c2c34	C19H19NO3	309.359	KNApSAcK
(-)-Stepharinosine	COc1cc2CCNC3CC4(C=CC(=O)CC4O)c(c1OC)c23	C18H21NO4	315.364	KNApSAcK
(-)-Stesakine Stesakine	COc1c(O)ccc2c1CC3N(C)CCc4cc5OCOc5c2c34	C19H19NO4	325.358	KNApSAcK
(-)-Stipiamide Fenalamid A1 Phenalamide A1 Stipiamide	CC(CO)NC(=O)\C(=C\C=C\C=C/C=C/C(=C/C(C)C(O)\C(=C\C(C)CCc1ccccc1)\C)/C)\C	C32H45NO3	491.705	KNApSAcK
(-)-Strempeliopine	O=C1CC23CCCN4CCC5c6ccccc6N1C5(CC2)C34	C19H22N2O	294.391	KNApSAcK
(-)-Strobilurin O 23,24-epoxystrobilurin G Strobilurin O	CO\C=C(/C(=C\C=C\c1ccc2OCC(OCC3OC3(C)C)C(C)(C)Oc2c1)/C)\C(=O)OC	C26H34O7	458.544	KNApSAcK
(-)-Strobilurin P Strobilurin P	CO\C=C(/C(=C\C=C\c1ccc2OCC(OC(=O)C=C(C)C)C(C)(C)Oc2c1)/C)\C(=O)OC	C26H32O7	456.528	KNApSAcK
(-)-Stylotelline Stylotelline [1R-(1alpha,4abeta,8aalpha)]-1,2,3,4,4a,5,6,8a-Oct	CCCC1=CC2([N+]#[C-])C(C)CCCC2(C)CC1	C16H25N	231.376	KNApSAcK
(-)-Stypoldione	CC1CCC2C3(C)CCC(O)C(C)(C)C3CCC2(C)C14CC5=C(O4)C(=CC(=O)C5=O)C	C27H38O4	426.588	KNApSAcK
(-)-Sukhodianine beta-N-oxide	COc1ccc2c(C(O)C3c4c(CCN3(=O)C)cc5OCOc5c24)c1OC	C20H21NO6	371.384	KNApSAcK
(-)-Sukhodianine Sukhodianine	COc1ccc2c(C(O)C3N(C)CCc4cc5OCOc5c2c34)c1OC	C20H21NO5	355.384	KNApSAcK
(-)-Sydowic acid Sydowic acid Sydwic acid	CC1(C)CCCC(C)(O1)c2ccc(cc2O)C(=O)O	C15H20O4	264.317	KNApSAcK
(-)-Syringolide 1	CCCCCC1(O)OC2C(O)COC23COC(=O)C13	C13H20O6	272.294	KNApSAcK
(-)-Tamariscol	CC1CCC2C1CCC(C)C2(O)C=C(C)C	C15H26O	222.366	KNApSAcK
(-)-Temuconine	COc1cc2CCN(C)C(Cc3ccc(Oc4cc(CC5N(C)CCc6cc(OC)c(OC)cc56)ccc4O)cc3)c2cc1O	C37H42N2O6	610.739	KNApSAcK
(-)-Tenuamine Tenuamine	CC(=O)N\C=C\1/CCCN2CCCC12	C11H18N2O	194.273	KNApSAcK
(-)-Terpendole B Terpendole B	CC(C)(O)C1CC2OC23C(CCC4(C)C3CCC5Cc6c([nH]c7ccccc67)C45C)O1	C27H35NO3	421.572	KNApSAcK
(-)-Terpendole C Terpendole C	CC(=CC1OC2C(OC3CCC4(C)C(O)(CCC5Cc6c([nH]c7ccccc67)C45C)C38OC28)C(C)(C)O1)C	C32H41NO5	519.672	KNApSAcK
(-)-Terpendole D Terpendole D	CC(=CCOC(C)(C)C1OC2CCC3(C)C(CCC4Cc5c([nH]c6ccccc56)C34C)C27OC7C1O)C	C32H43NO4	505.688	KNApSAcK
(-)-Tetrahydropalmatrubine 9-O-Desmethyl-L-THP	COc1ccc2CC3N(CCc4cc(OC)c(OC)cc34)Cc2c1O	C20H23NO4	341.401	KNApSAcK
(-)-Tetrahydrostephabine	COc1cc2CC3N(CCc4cc(OC)c(OC)c(O)c34)Cc2cc1OC	C21H25NO5	371.427	KNApSAcK
(-)-Tetrazomine Antibiotic Y 09194L-B Tetrazomine	COc1c(NC(=O)C2NCCCC2O)ccc3CC4C5C(CO)CC(C6OCC(N46)c13)N5C	C24H34N4O5	458.551	KNApSAcK
(-)-Tetrodecamycin Antibiotic MJ 885mF8 Tetrodecamycin	CC1C2OC3=C(C(=O)OC3=C)C(=O)C1(C)C4CCCCC4(O)C2O	C18H22O6	334.364	KNApSAcK
(-)-Thaicanine	COc1ccc2CC3N(CCc4c(O)c(OC)c(OC)cc34)Cc2c1OC	C21H25NO5	371.427	KNApSAcK
(-)-Thannilignan	COc1ccc(CC(O)(CO)C(=C)Cc2ccc(O)cc2)c(O)c1	C19H22O5	330.375	KNApSAcK
(-)-Thiangazole Thiangazole	CNC(=O)c1nc(oc1C)C2(C)CSC(=N2)C3(C)CSC(=N3)C4(C)CSC(=N4)\C=C\c5ccccc5	C26H29N5O2S3	539.736	KNApSAcK
(-)-Tirotundifolin B Tirotundifolin B (3aR,4R,5aR,6R,9bS)-[partial]-2,3,3a,4,5,5	CC(O)C(=C)C(=O)OC1CC2(C)C(O)CCC(=C2C3OC(=O)C(=C)C13)C	C20H26O6	362.417	KNApSAcK
(-)-TMC 120A TMC 120A	CC(C)C1Oc2c(ccc3cc(C)ncc23)C1=O	C15H15NO2	241.285	KNApSAcK
(-)-Tochuinyl acetate Tochuinol acetate Tochuinyl acetate	CC(=O)OCC1(C)CCCC1(C)c2ccc(C)cc2	C17H24O2	260.371	KNApSAcK
(-)-Tortuosamine	CNCCC1(CCc2ncccc2C1)c3ccc(OC)c(OC)c3	C20H26N2O2	326.433	KNApSAcK
(-)-Trachelogenin	COc1ccc(CC2COC(=O)C2(O)Cc3ccc(O)c(OC)c3)cc1OC	C21H24O7	388.411	KNApSAcK
(-)-trans-Carveol	CC(=C)C1CC=C(C)C(O)C1	C10H16O	152.233	KNApSAcK
(-)-trans-Isopiperitenol	CC(=C)C1CCC(=CC1O)C	C10H16O	152.233	KNApSAcK
(-)-trans-Selina-4(15),11-dien-5-ol	CC(=C)C1CCC2(C)CCCC(=C)C2(O)C1	C15H24O	220.35	KNApSAcK
(-)-Tremediol	CC1=C2CC(C)(C)C(O)C2CC3(C)CCC13O	C15H24O2	236.35	KNApSAcK
(-)-Trichodimerol BMS 182123 Trichodimerol	C\C=C\C=C\C(=O)C1=C(O)C2(C)C3C(=C(O)C4(C)C1C5(C)OC4(O)C3(C)OC25O)C(=O)\C=C\C=C\C	C28H32O8	496.549	KNApSAcK
(-)-Triptofordin C 1 Triptofordin C 1	CC(=O)OC1C2C(OC(=O)c3ccccc3)C(OC(=O)c4ccccc4)C5(C)C(OC(=O)C)C(=O)CC(C)(O)C15OC2(C)C	C33H36O11	608.632	KNApSAcK
(-)-Triptofordin C 2 Triptofordin C 2	CC(=O)OC1C(O)CC(C)(O)C23OC(C)(C)C(C(OC(=O)c4ccccc4)C(OC(=O)c5ccccc5)C12C)C3OC(=O)C	C33H38O11	610.648	KNApSAcK
(-)-Tryprostatin A Tryprostatin A (3S-trans)-Hexahydro-3-[[6-methoxy-2-(3-methyl	COc1ccc2c(CC3NC(=O)C4CCCN4C3=O)c(CC=C(C)C)[nH]c2c1	C22H27N3O3	381.468	KNApSAcK
(-)-Tuberosin 6a-Hydroxypterocarpan	CC1(C)Oc2cc3OC4c5ccc(O)cc5OCC4(O)c3cc2C=C1	C20H18O5	338.354	KNApSAcK
(-)-Tuduranine Tuduranine	COc1cc2CCNC3Cc4ccc(O)cc4c(c1OC)c23	C18H19NO3	297.348	KNApSAcK
(-)-Turkiyenine	CN1C=Cc2cc3OCOc3cc2C(=O)C14COc5c6OCOc6ccc45	C20H15NO6	365.336	KNApSAcK
(-)-Tylocrebine	COc1ccc2c3CN4CCCC4Cc3c5cc(OC)c(OC)cc5c2c1OC	C24H27NO4	393.475	KNApSAcK
(-)-UCS 1025B UCS 1025B	CC1C=CC2CCCCC2C1C(=O)C3(O)C4OC(=O)C5CCN(C3=O)C45O	C20H25NO6	375.416	KNApSAcK
(-)-UCT 1072M1 UCT 1072M1 UCT 1O72M1	OC1COC2Oc3cc4C(=O)c5cc(O)cc(O)c5C(=O)c4c(O)c3C12	C18H12O8	356.283	KNApSAcK
(-)-Umbellamine	CCC12CCCN3CCc4c(C13)n(C(C2)c5cc6c(cc5O)N(C)C78OCC9(C%10CC7N(CCC689)C/C/%10=C/C)C(=O)OC)c%11ccccc4%11	C41H48N4O4	660.844	KNApSAcK
(-)-Ursanthemolide Ursanthemolide	CC(OC(=O)C)C(C)(O)C(=O)OC1CC(=C)C(O)CC\C(=C\C2OC(=O)C(=C)C12)\C	C22H30O8	422.469	KNApSAcK
(-)-Ursiniolide D Ursiniolide D	CC(O)C(C)(O)C(=O)OC1C\C(=C/CC\C(=C\C2OC(=O)C(=C)C12)\C)\C	C20H28O6	364.433	KNApSAcK
(-)-Ushinsunine beta-N-oxide N-Oxyushinsunine Ushinsunine N-oxide	CN1(=O)CCc2cc3OCOc3c4c5ccccc5C(O)C1c24	C18H17NO4	311.332	KNApSAcK
(-)-Vaganine D	CC(N(C)C)C1=CCC2C3CCC4C(OC(=O)C)C(CCC4(C)C3CCC12C)NC(=O)C=C(C)C	C30H48N2O3	484.714	KNApSAcK
(-)-Valeranone (-)-Jatamansone	CC(C)C1CCC2(C)CCCC(=O)C2(C)C1	C15H26O	222.366	KNApSAcK
(-)-Vallesamidine	CCC12CCCN3CCC4c5ccccc5N(C)C4(CC1)C23	C20H28N2	296.45	KNApSAcK
(-)-Variabilin Homopisatin 6a-Hydroxy-3,9-dimethoxypterocarpan	COc1ccc2C3Oc4cc(OC)ccc4C3(O)COc2c1	C17H16O5	300.306	KNApSAcK
(-)-Venalstonidine 6,7-Epoxykopsinine	COC(=O)C1CC23CCC14Nc5ccccc5C46CCN(CC7OC27)C36	C21H24N2O3	352.427	KNApSAcK
(-)-Venalstonine	COC(=O)C1CC23CCC14Nc5ccccc5C46CCN(CC=C2)C36	C21H24N2O2	336.427	KNApSAcK
(-)-Vincamajine N-Methylquebrachidine	COC(=O)C12C3CC4(C1O)C(C5CC2\C(=C/C)\CN35)N(C)c6ccccc46	C22H26N2O3	366.453	KNApSAcK
(-)-Vincamedine O-Acetylvincamajine Vincamajine acetate	COC(=O)C12C3CC4(C1OC(=O)C)C(C5CC2\C(=C/C)\CN35)N(C)c6ccccc46	C24H28N2O4	408.49	KNApSAcK
(-)-Vincapusine	CCC12CC3(OC1C(O)CN4CCc5c(C24)n3c6ccccc56)C(=O)OC	C21H24N2O4	368.426	KNApSAcK
(-)-Vincawajine	COc1ccc2N=C3C4CC5C(COC(=O)C)C(C)N4C6CC3(C(OC(=O)C)C56)c2c1	C24H28N2O5	424.49	KNApSAcK
(-)-Vinorine Vinorine 21-Deoxyvomilenine	C\C=C/1\CN2C3CC45C(OC(=O)C)C3C1CC2C4=Nc6ccccc56	C21H22N2O2	334.412	KNApSAcK
(-)-Virantmycin NSC 374127 Virantmycin	COCC1(CCC(=C(C)C)C)Nc2ccc(cc2CC1Cl)C(=O)O	C19H26ClNO3	351.868	KNApSAcK
(-)-VM-55599 VM-55599	CC1CCN2CC34Cc5c([nH]c6ccccc56)C(C)(C)C3CC12C(=O)N4	C22H27N3O	349.469	KNApSAcK
(-)-Waol A FD 211	C\C=C\C1OC2C(OC(=O)C2=CC1O)\C=C\C	C13H16O4	236.264	KNApSAcK
(-)-Woodinine Woodinine	CN1CCCC1C2N(C)CCc3c2[nH]c4ccc(Br)cc34	C17H22BrN3	348.281	KNApSAcK
(-)-Xylariamide A	COC(=O)\C=C\C(=O)NC(Cc1ccc(O)c(Cl)c1)C(=O)O	C14H14ClNO6	327.717	KNApSAcK
(-)-Xylopine Xylopine	COc1ccc2c(CC3NCCc4cc5OCOc5c2c34)c1	C18H17NO3	295.332	KNApSAcK
(-)-Yomogin [3aR-(3aalpha,8abeta,9aalpha)]-3a,8a,9,9a-Tetrahydro-5,8a-dimethyl-3	CC1=C2CC3C(CC2(C)C=CC1=O)OC(=O)C3=C	C15H16O3	244.286	KNApSAcK
(-)-Zafronic acid methyl ester	COC(=O)C(=C)C1CCC(C)(O)C2CC(O)C(=CC12)C	C16H24O4	280.359	KNApSAcK
(-)-Zinaflavin F Zinaflavin F	CC(=O)OC1C2OC(=O)C(=C)C2C3OC(=O)C(=C)C3C1(C)C4CO4	C17H18O7	334.321	KNApSAcK
(-)-Zonarene	CC(C)C1=C2C=C(C)CCC2C(C)CC1	C15H24	204.351	KNApSAcK
(1'R,2'R)-1'-(4-Hydroxyphenyl)propane-1',2'-diol 2'-O-D-glucopyranoside	CC(OC1OC(CO)C(O)C(O)C1O)C(O)c2ccc(O)cc2	C15H22O8	330.33	KNApSAcK
(1'R,2'R)-Guaiacyl glycerol (-)-(1'R,2'R)-Guaiacyl glycerol	COc1cc(ccc1O)C(O)C(O)CO	C10H14O5	214.215	KNApSAcK
(1'R,2'R)-Guaiacyl glycerol 4-O-beta-D-glucopyranoside (-)-(1'R,2'R)-Guaiacyl gl	COc1cc(ccc1OC2OC(CO)C(O)C(O)C2O)C(O)C(O)CO	C16H24O10	376.356	KNApSAcK
(1'R,2'S,6'R)-2-Hydroxyisopanduratin A	CC(=CCC1C(C(CC=C1C)C(=O)c2c(O)cc(O)cc2O)c3ccccc3)C	C25H28O4	392.487	KNApSAcK
(1'S,2'S)-Anethole glycol 2'-O-beta-D-glucopyranoside (+)-(1'S,2'S)-Anethole gly	COc1ccc(cc1)C(O)C(C)OC2OC(CO)C(O)C(O)C2O	C16H24O8	344.357	KNApSAcK
(10R)-8,9-Dihydro-10-(2,4-dihydroxyphenyl)-8-(3,4-dihydroxyphenyl)-9-hydroxy-10H	OC1Cc2c(O)cc3OC(C(O)C(c4ccc(O)cc4O)c3c2OC1c5ccc(O)c(O)c5)c6ccc(O)c(O)c6	C30H26O11	562.521	KNApSAcK
(11R)-11,13-Dihydroschkuhriolide	CC1C2C(O)\C=C(/C)\CC\C=C(\CC2OC1=O)/C(=O)O	C15H20O5	280.316	KNApSAcK
(11R)-11,13-Dihydrotatridin A	CC1C2C(O)\C=C(\C)/CCC(O)\C(=C/C2OC1=O)\C	C15H22O4	266.333	KNApSAcK
(11S)-10alpha-Hydroxy-3-oxoguaia-4-eno-12,6alpha-lactone	CC1C2CCC(C)(O)C3CC(=O)C(=C3C2OC1=O)C	C15H20O4	264.317	KNApSAcK
(11S)-Arsanin Arsanin Taraxacolide [3S-(3alpha,3aalpha,5abeta,6beta,9alpha,9aalp	CC1C2CCC3(C)C(O)CC(=O)C(C)C3C2OC1=O	C15H22O4	266.333	KNApSAcK
(12E)-Lembyne A	CC\C(=C\1/OC2CC3OC2C1C3C(Cl)\C=C/C#C)\Br	C15H16BrClO2	343.643	KNApSAcK
(12S)-12-hydroxyretroisosenine	CC12CC(=O)OC3CCN4CC=C(COC(=O)C(C)(O1)C(C)(O)C2)C34	C18H25NO6	351.394	KNApSAcK
(12S,15S)-15-O-Demethyl-10,29-dideoxy-11,12-dihydro-striatin C CJ 14258	CC(C)C1=C2C3CCC4C(O)OC5C(O)COC6OC(C4C56O)C3(C)CCC2(C)CC1	C25H38O6	434.566	KNApSAcK
(13'Z)-Capsanthin	C\C(=C\C=C\C=C(/C)\C=C\C=C(/C)\C=C\C1=C(C)CC(O)CC1(C)C)\C=C\C=C(/C)\C=C\C(=O)C2(C)CC(O)CC2(C)C	C40H56O3	584.871	KNApSAcK
(13E,17E)-Polypoda-7,13,17,21-tetraen-3beta-ol (+)-(13E,17E)-Polypoda-7,13,17,21	CC(=CCC\C(=C\CC\C(=C\CCC1C(=CCC2C(C)(C)C(O)CCC12C)C)\C)\C)C	C30H50O	426.717	KNApSAcK
(13R)-Premarrubiin	CC1CC2OC(=O)C3(C)CCCC(C)(C23)C14CCC5(COC=C5)O4	C20H28O4	332.434	KNApSAcK
(13S)-7-Labdene-15,18-dioic acid	CC(CCC1C(=CCC2C1(C)CCCC2(C)C(=O)O)C)CC(=O)O	C20H32O4	336.466	KNApSAcK
(13Z)-beta,beta-Carotene	C\C(=C\C=C\C=C(/C)\C=C\C=C(/C)\C=C\C1=C(C)CCCC1(C)C)\C=C\C=C(/C)\C=C\C2=C(C)CCCC2(C)C	C40H56	536.873	KNApSAcK
(14R)-Reframidine N-oxide (-)-(5R,11S,14R)-Reframidine N-oxide	CN1(=O)CC2c3cc4OCOc4cc3CC1c5cc6OCOc6cc25	C19H17NO5	339.342	KNApSAcK
(14S)-14,15-Dihydroxy-8(17),13(16)-labdadien-19-oic acid	CC12CCCC(C)(C1CCC(=C)C2CCC(=C)C(O)CO)C(=O)O	C20H32O4	336.466	KNApSAcK
(16E)-1,6-Dihydroxy-8-(3-hydroxy-3-methylbut-1-enyl)-3,7-dimethoxy-2-(3-methylbu	COc1cc2Oc3cc(O)c(OC)c(\C=C\C(C)(C)O)c3C(=O)c2c(O)c1CC=C(C)C	C25H28O7	440.486	KNApSAcK
(16E)-1-Hydroxy-8-(3-hydroxy-3-methylbut-1-enyl)-3,6,7-trimethoxy-2-(3-methylbut	COc1cc2Oc3cc(OC)c(OC)c(\C=C\C(C)(C)O)c3C(=O)c2c(O)c1CC=C(C)C	C26H30O7	454.512	KNApSAcK
(16R)-Descarbomethoxytacamine	CCC1CC2CC(O)n3c4C2N(CCc4c5ccccc35)C1	C19H24N2O	296.407	KNApSAcK
(18S)-Pyrrosialactol (+)-(18S)-Pyrrosialactol	CC1(C)CCCC2(C)C1CCC3(C)C2CCC4C(CCC34C)C5(C)CCC(O)O5	C27H46O2	402.653	KNApSAcK
(18S)-Pyrrosialactone	CC1(C)CCCC2(C)C1CCC3(C)C2CCC4C(CCC34C)C5(C)CCC(=O)O5	C27H44O2	400.637	KNApSAcK
(19R)-19-Hydroxytabernaelegantine A	CCC1CN(C)C2Cc3c([nH]c4ccccc34)C(CC1C2C(=O)OC)c5c(OC)ccc6c7CCN8CC9CC(C(C)O)C8C(C9)(C(=O)OC)c7[nH]c56	C43H54N4O6	722.912	KNApSAcK
(19R,23E)-5beta,19-Epoxy-19,25-dimethoxycucurbita-6,23-dien-3beta-ol	COC1OC23C=CC4C5(C)CCC(C(C)C\C=C\C(C)(C)OC)C5(C)CCC14C2CCC(O)C3(C)C	C32H52O4	500.753	KNApSAcK
(19R,23E)-5beta,19-Epoxy-19-methoxycucurbita-6,23,25-trien-3beta-ol	COC1OC23C=CC4C5(C)CCC(C(C)C\C=C\C(=C)C)C5(C)CCC14C2CCC(O)C3(C)C	C31H48O3	468.711	KNApSAcK
(19S)-Hydroxytacamine	COC(=O)C1(O)CC2CC(CN3CCc4c(C23)n1c5ccccc45)C(C)O	C21H26N2O4	370.442	KNApSAcK
(1alpha,2beta,4aalpha,8aalpha)-Decahydro-1-isocyano-4a-methyl-8-methylene-2-(1-m	CC(C)C1CCC2(C)CCCC(=C)C2C1[N+]#[C-]	C16H25N	231.376	KNApSAcK
(1alpha,2beta,4aalpha,8aalpha)-N-[Decahydro-4a-methyl-8-methylene-2-(1-methyleth	CC(C)C1CCC2(C)CCCC(=C)C2C1NC=O	C16H27NO	249.392	KNApSAcK
(1alpha,2beta,4abeta,5beta,8aalpha)-(+-)-decahydro-4a-methyl-8-methylene-2-(1-me	CC(C)C1CCC2(C)C(CCC(=C)C2C1OC(=O)C)OC(=O)C	C19H30O4	322.439	KNApSAcK
(1alpha,3beta,5beta)-(-)-2-(3-Bromo-2,2,5-trimethylcyclopentyl)-5-methylphenol	CC1CC(Br)C(C)(C)C1c2ccc(C)cc2O	C15H21BrO	297.231	KNApSAcK
(1alpha,4alpha,7R)-5-methyl-7-(1-methylethyl)-2,3-dioxabicyclo[2.2.2]oct-5-ene	CC(C)C1CC2OOC1C=C2C	C10H16O2	168.233	KNApSAcK
(1alpha,4beta,5alpha)-4-Hydroxy-6,6-dimethylbicyclo[3.1.1]hept-2-ene-2-methanol	CC1(C)C2CC1C(=CC2O)CO	C10H16O2	168.233	KNApSAcK
(1alpha,5alpha,6alpha)-(-)-2,6-dimethylbicyclo[3.1.1]hept-2-ene-6-methanol aceta	CC(=O)OCC1(C)C2CC=C(C)C1C2	C12H18O2	194.27	KNApSAcK
(1alpha,5alpha,6alpha)-2,6-dimethylbicyclo[3.1.1]hept-2-ene-6-methanol	CC1=CCC2CC1C2(C)CO	C10H16O	152.233	KNApSAcK
(1E,22Z)-1,22-Diferuloyloxydocosane	COc1cc(\C=C/C(=O)OCCCCCCCCCCCCCCCCCCCCCCOC(=O)\C=C\c2ccc(O)c(OC)c2)ccc1O	C42H62O8	694.937	KNApSAcK
(1E,4R,6S)-1,6-Dibromo-1,3(8)-ochtodien-4-ol [1alpha,2(E),5alpha]-(-)-5-bromo-2-	CC1(C)C=C(\C=C\Br)C(O)CC1Br	C10H14Br2O	310.026	KNApSAcK
(1E,6E)-1,7-Diphenyl-1,6-heptadiene-3,5-dione	O=C(CC(=O)\C=C\c1ccccc1)\C=C\c2ccccc2	C19H16O2	276.329	KNApSAcK
(1E,6S,8S)-1,6-Dibromo-8-chloro-1,3-ochtodiene [1(E),4alpha,6beta]-(+)-4-bromo-1	CC1(C)C(Br)CC=C(\C=C\Br)C1Cl	C10H13Br2Cl	328.471	KNApSAcK
(1R)-2-Oxo-3,4-dehydroneomajucin (-)-(1R)-2-Oxo-3,4-dehydroneomajucin	CC1C(=O)C=C2C3(C)COC(=O)C3(O)C4CC12C(O)C(=O)O4	C15H16O7	308.283	KNApSAcK
(1R,10R)-Aromadendran-9-one	CC1CCC2C(C)C(=O)CC3C(C12)C3(C)C	C15H24O	220.35	KNApSAcK
(1R,2R)-1,2-Dimethyl-2-(4-methyl-1,4-cyclohexadien-1-yl)cyclopentanemethanol ace	CC(=O)OCC1(C)CCCC1(C)C2=CCC(=CC2)C	C17H26O2	262.387	KNApSAcK
(1R,2R,3R,4R)-Suberin A	OCC1OC(OC2(CC3OC3C2O)C#N)C(O)C(O)C1O	C12H17NO8	303.265	KNApSAcK
(1R,2R,4R,5S)-(+)-p-Menthane-2,5-diol	CC(C)C1CC(O)C(C)CC1O	C10H20O2	172.265	KNApSAcK
(1R,2R,4S)-2-Hydroxy-1,8-cineole beta-D-glucopyranoside (-)-(1R,2R,4S)-2-Hydroxy	CC1(C)OC2(C)CCC1CC2OC3OC(CO)C(O)C(O)C3O	C16H28O7	332.389	KNApSAcK
(1R,2R,4S)-p-Menth-5-ene-1,2-diol	CC(C)C1CC(O)C(C)(O)C=C1	C10H18O2	170.249	KNApSAcK
(1R,2R,4S,5R)-2-Bromo-1-(2-bromoethenyl)-4,5,-dichloro-1,5-dimethylcyclohexane	CC1(Cl)CC(C)(\C=C\Br)C(Br)CC1Cl	C10H14Br2Cl2	364.932	KNApSAcK
(1R,2S,5R)-(+)-10-Pinanol	CC1(C)C2CCC(CO)C1C2	C10H18O	154.249	KNApSAcK
(1R,3aR,4R,7aS)-Octahydro-3a-methyl-7-methylene-1-(2-methyl-1-propenyl)-1H-inden	CC(=CC1CCC2(C)C(O)CCC(=C)C12)C	C15H24O	220.35	KNApSAcK
(1R,4R)-4-Hydroxydauca-7-ene-6-one (+)-(1R,4R)-4-Hydroxydauca-7-ene-6-one	CC(C)C1(O)CCC2(C)CC(=O)C(=CC(=O)C12)C	C15H22O3	250.333	KNApSAcK
(1R,4S)-1-Hydroperoxy-p-menth-2-en-8-ol acetate	CC(=O)OC(C)(C)C1CCC(C)(OO)C=C1	C12H20O4	228.285	KNApSAcK
(1R,4S)-Taraktophyllin	OCC1OC(OC2(CC(O)C=C2)C#N)C(O)C(O)C1O	C12H17NO7	287.266	KNApSAcK
(1R,6S,7S,10S)-10-Isothiocyanato-4-amorphene 10-Isothiocyanato-4-amorphene	CC(C)C1CCC(C)(N=C=S)C2CCC(=CC12)C	C16H25NS	263.441	KNApSAcK
(1R-cis)-1-(1,2-dimethyl-3-methylenecyclopentyl)-4-methyl-1,4-Cyclohexadiene Iso	CC1C(=C)CCC1(C)C2=CCC(=CC2)C	C15H22	202.335	KNApSAcK
(1R-cis)-1-[3-(Bromomethyl)-1-methyl-2-methylenecyclopentyl]-4-methylbenzene 12-	Cc1ccc(cc1)C2(C)CCC(CBr)C2=C	C15H19Br	279.215	KNApSAcK
(1R-cis)-2-(1,2-Dimethyl-3-methylenecyclopentyl)-5-methylphenol 7-Hydroxylaurene	CC1C(=C)CCC1(C)c2ccc(C)cc2O	C15H20O	216.319	KNApSAcK
(1R-cis)-4-(1,2-Dimethyl-3-methylenecyclopentyl)-1,4-cyclohexadiene-1-methanol I	CC1C(=C)CCC1(C)C2=CCC(=CC2)CO	C15H22O	218.335	KNApSAcK
(1R-cis)-4-(1,2-Dimethyl-3-methylenecyclopentyl)benzaldehyde Laurenal	CC1C(=C)CCC1(C)c2ccc(C=O)cc2	C15H18O	214.303	KNApSAcK
(1R-cis)-4-(1,2-Dimethyl-3-methylenecyclopentyl)benzenemethanol Laurenol	CC1C(=C)CCC1(C)c2ccc(CO)cc2	C15H20O	216.319	KNApSAcK
(1R-cis)-4-Bromo-2-(1,2-dimethyl-3-methylenecyclopentyl)-3-iodo-5-methylphenol	CC1C(=C)CCC1(C)c2c(O)cc(C)c(Br)c2I	C15H18BrIO	421.111	KNApSAcK
(1R-cis)-4-Bromo-2-[3-(hydroxymethyl)-1,2-dimethyl-3-cyclopenten-1-yl]-5-methylp	CC1C(=CCC1(C)c2cc(Br)c(C)cc2O)CO	C15H19BrO2	311.214	KNApSAcK
(1R-endo)-3-hydroxy-4-(hydroxymethyl)-7,7-dimethyl-bicyclo[2.2.1]heptan-2-one	CC1(C)C2CCC1(CO)C(O)C2=O	C10H16O3	184.232	KNApSAcK
(1R-trans)-1,2,3,4-Tetrahydro-7-hydroxy-6-methyl-4-(1-methylethyl)-1-naphthalene	CC(C)C1CCC(CO)c2cc(O)c(C)cc12	C15H22O2	234.334	KNApSAcK
(1R-trans)-1-Methyl-4-(1-methylethyl)-4-cyclohexene-1,2-diol	CC(C)C1=CCC(C)(O)C(O)C1	C10H18O2	170.249	KNApSAcK
(1S)-1,2,3,4-Tetrahydromanzamine B	C1CC\C=C/CCC23CN4CCCC\C=C\CCC5(OC5C(C2CC4)C6NCCc7c6[nH]c8ccccc78)C3NC1	C36H50N4O	554.808	KNApSAcK
(1S)-7-Methoxy-1,2-dihydrocadalene	COc1cc2C(C)CC=C(C(C)C)c2cc1C	C16H22O	230.345	KNApSAcK
(1S)-ent-Verticilla-3E,7E,12-trien-1-ol	C\C\1=C/CC2(O)CC=C(C)C(CC\C(=C\CC1)\C)C2(C)C	C20H32O	288.467	KNApSAcK
(1S,10S)-9alpha-Hydroxy-allo-aromadendrane	CC1CCC2C(C)C(O)CC3C(C12)C3(C)C	C15H26O	222.366	KNApSAcK
(1S,2R)-O-Methylnyasicoside	COC(C(CC#Cc1ccc(O)c(O)c1)OC2OC(CO)C(O)C(O)C2O)c3ccc(O)c(O)c3	C24H28O11	492.473	KNApSAcK
(1S,2R,7aR,13aR)-2,3,13,13a-Tetrahydro-1,2,7a-trihydroxy-9,10-dimethoxy-3,3-dime	COc1cc2OCC3Oc4c5C(O)C(O)C(C)(C)Oc5ccc4C(=O)C3(O)c2cc1OC	C23H24O9	444.431	KNApSAcK
(1S,2S)-3-Oxo-2[(2Z)-pentenyl]cyclopentane-1-butyric acid	CC\C=C/CC1C(CCCC(=O)O)CCC1=O	C14H22O3	238.323	KNApSAcK
(1S,3R)-Nanaomycin A	CC1OC(CC(=O)O)CC2=C1C(=O)c3c(O)cccc3C2=O	C16H14O6	302.279	KNApSAcK
(1S,3R,4R)-Calamenene-3,4,7-triol	CC(C)C1(O)C(O)CC(C)c2cc(O)c(C)cc12	C15H22O3	250.333	KNApSAcK
(1S,3R,4S)-Calamenene-3,7-diol	CC(C)C1C(O)CC(C)c2cc(O)c(C)cc12	C15H22O2	234.334	KNApSAcK
(1S,3S)-Austrocortilutein (+)-(1S,3S)-Austrocortilutein	COc1cc(O)c2C(=O)C3=C(CC(C)(O)CC3O)C(=O)c2c1	C16H16O6	304.295	KNApSAcK
(1S,4R)-(+)-Isodihydrocarvone	CC1CCC(CC1=O)C(=C)C	C10H16O	152.233	KNApSAcK
(1S,4R)-7-Methoxycalamenen-4-ol	COc1cc2C(C)CCC(O)(C(C)C)c2cc1C	C16H24O2	248.361	KNApSAcK
(1S,4R)-passicapsin	CC1OC(CC(O)C1O)OC2CC(OC3OC(CO)C(O)C(O)C3O)(C=C2)C#N	C18H27NO10	417.408	KNApSAcK
(1S,5R)-(+)-6,6-dimethylbicyclo[3.1.1]hept-2-ene-2-carboxylic acid	CC1(C)C2CC=C(C1C2)C(=O)O	C10H14O2	166.217	KNApSAcK
(1S-cis)-1,2,3,5,6,7,8,8a-Octahydro-1,8a-dimethyl-7-(1-methylethylidene)naphthal	CC1CCC=C2CCC(=C(C)C)CC12C	C15H24	204.351	KNApSAcK
(1S-cis)-1-[3-(Bromomethyl)-1-methyl-2-methylenecyclopentyl]-4-methyl-1,4-cycloh	CC1=CCC(=CC1)C2(C)CCC(CBr)C2=C	C15H21Br	281.231	KNApSAcK
(2''R)-2''-Hydroxyoleuropein	COC(=O)C1=COC(OC2OC(CO)C(O)C(O)C2O)\C(=C\C)\C1CC(=O)OCC(O)c3ccc(O)c(O)c3	C25H32O14	556.513	KNApSAcK
(2''R,3''R)-Epoxyangeloyldecursinol	CC1OC1(C)C(=O)OC2Cc3cc4C=CC(=O)Oc4cc3OC2(C)C	C19H20O6	344.358	KNApSAcK
(2'E)-2',3'-Didehydro-2'-deoxy-13'-hydroxyverrucarin A PD 113,325	CC1=CC2OC3CC4OC(=O)\C=C\C=C\C(=O)OCC\C(=C/C(=O)OCC2(CC1)C4(C)C35CO5)\CO	C27H32O9	500.538	KNApSAcK
(2'E,4'R,7'R,9R,10S)-2',3'-Didehydro-7'-deoxo-2'-deoxy-9,10-epoxy-9,10-dihydro-4	CC(O)C1OCC(O)\C(=C\C(=O)OCC23CCC4(C)OC4C2OC5CC(OC(=O)\C=C/C=C/1)C3(C)C56CO6)\C	C29H38O10	546.606	KNApSAcK
(2'E,8R)-2',3'-Didehydro-2'-deoxy-4',8-dihydroxyverrucarin A Baccharinoid B 25	CC1=CC2OC3CC4OC(=O)\C=C\C=C\C(=O)OCC(O)\C(=C\C(=O)OCC2(CC1O)C4(C)C35CO5)\C	C27H32O10	516.537	KNApSAcK
(2'R)-Hydroxystemofoline	CCC(O)CC12C3CC4C5C(C)\C(=C/6\OC(=O)C(=C6OC)C)\OC5(O3)C1CCN24	C22H29NO6	403.469	KNApSAcK
(2'S,3'R)-13'-Deoxy-2',3'-epoxy-2',3',7',8'-tetrahydro-13'-oxosatratoxin H Mytox	CC(=O)C12CC\C=C/C(=O)OC3CC4OC5C=C(C)CCC5(COC(=O)C6OC6(CCO1)C2O)C3(C)C47CO7	C29H36O10	544.59	KNApSAcK
(2'S,3'R,4'S,7'R,8R)-7'-Deoxo-2'-deoxy-2',3'-epoxy-4',8-dihydroxy-7'-[(1R)-1-hyd	CC(O)C1OCC(O)C2(C)OC2C(=O)OCC34CC(O)C(=CC3OC5CC(OC(=O)\C=C\C=C\1)C4(C)C56CO6)C	C29H38O11	562.605	KNApSAcK
(2'S,3'R,4'S,7'R,9R,10S)-7'-Deoxo-2'-deoxy-2',3' 9,10-diepoxy-9,10-dihydro-4'-hy	CC(O)C1OCC(O)C2(C)OC2C(=O)OCC34CCC5(C)OC5C3OC6(CC(OC(=O)\C=C\C=C/1)C46C)C7CO7	C29H38O11	562.605	KNApSAcK
(2'S,3'S,6'R,8'R)-Homononactoyl-(2R,3R,6S,S)-nonactic acid Feigrisolide C	CCC(O)CC1CCC(O1)C(C)C(=O)OC(C)CC2CCC(O2)C(C)C(=O)O	C21H36O7	400.506	KNApSAcK
(2,3-trans)-beta,psi-Carotene-2,3-diol	CC(=CCC\C(=C\C=C\C(=C\C=C\C(=C\C=C\C=C(/C)\C=C\C=C(/C)\C=C\C1=C(C)CC(O)C(O)C1(C)C)\C)\C)\C)C	C40H56O2	568.871	KNApSAcK
(2,3-trans-3,4-cis)-3',4'-Methylenedioxy-3,4,5,6-tetramethoxy-[2'',3'' 7,8]-fura	COC1C(OC)c2c(OC)c(OC)c3occc3c2OC1c4ccc5OCOc5c4	C22H22O8	414.405	KNApSAcK
(2,3-trans-3,4-trans)-3',4'-Methylenedioxy-3,4,5,8-tetramethoxy-[2'',3'' 7,6]-fu	COC1C(OC)c2c(OC)c3ccoc3c(OC)c2OC1c4ccc5OCOc5c4	C22H22O8	414.405	KNApSAcK
(2,4)-cis-Asitrocinone	CCCCCCCCCCCCC(O)C1CCC(O1)C(O)CCC(O)CCCCCCCC2CC(CC(=O)C)C(=O)O2	C35H64O7	596.878	KNApSAcK
(2,4-cis)-3',4-Methylenedioxy-4,5,8-trimethoxy-[2'',3'' 7,6]-furanoflavan	COC1CC(Oc2c(OC)c3occc3c(OC)c12)c4ccc5OCOc5c4	C21H20O7	384.379	KNApSAcK
(2,4-cis)-4,5,6-Trimethoxy-[2'',3'' 7,8]furanoflavan	COC1CC(Oc2c1c(OC)c(OC)c3occc23)c4ccccc4	C20H20O5	340.37	KNApSAcK
(2-exo,3-endo)-2,3-dimethyl-Bicyclo[2.2.1]heptan-2-ol	CC1C2CCC(C2)C1(C)O	C9H16O	140.223	KNApSAcK
(20'S)-19',20'-Dihydrotabernamine 19,20-Dihydrotabernamine	CCC1CN(C)C2Cc3c([nH]c4ccccc34)C(CC1C2C(=O)OC)c5cccc6c7CCN8CC9CC(CC)C8C(C9)c7[nH]c56	C40H50N4O2	618.851	KNApSAcK
(20E)-Ginsenoside F4 (-)-(20E)-Ginsenoside F4 Ginsenoside F4	CC1OC(OC2C(O)C(O)C(CO)OC2OC3CC4(C)C(CC(O)C5C(CCC45C)\C(=C\CC=C(C)C)\C)C6(C)CCC(O)C(C)(C)C36)C(O)C(O)C1O	C42H70O12	766.998	KNApSAcK
(20R)-15,20-Dihydrocleavamine 5,20beta-Dihydrocleavamine 4beta-Dihydrocleavamine	CCC1CC2CCc3[nH]c4ccccc4c3CCN(C1)C2	C19H26N2	282.423	KNApSAcK
(20R)-Ginsenoside RH1	CC(=CCCC(C)(O)C1CCC2(C)C1C(O)CC3C4(C)CCC(O)C(C)(C)C4C(CC23C)OC5OC(CO)C(O)C(O)C5O)C	C36H62O9	638.872	KNApSAcK
(20R)-Pseudovincadifformine	CCC1CC2CCC3=Nc4ccccc4C35CCN(C1)C25	C19H24N2	280.407	KNApSAcK
(20S)-3beta-Acetoxy-20-hydroperoxy-30-norlupane	CC(OO)C1CCC2(C)CCC3(C)C(CCC4C5(C)CCC(OC(=O)C)C(C)(C)C5CCC34C)C12	C31H52O4	488.742	KNApSAcK
(20S)-3beta-Acetoxylupan-29-oic acid	CC(C1CCC2(C)CCC3(C)C(CCC4C5(C)CCC(OC(=O)C)C(C)(C)C5CCC34C)C12)C(=O)O	C32H52O4	500.753	KNApSAcK
(20S)-Dammara-13(17),24-dien-3-one (+)-(20S)-Dammara-13(17),24-dien-3-one	CC(CCC=C(C)C)C1=C2CCC3C4(C)CCC(=O)C(C)(C)C4CCC3(C)C2(C)CC1	C30H48O	424.702	KNApSAcK
(20S)-Hydroxy-1,2-dehydropseudoaspidospermidine	CCC1(O)CC2CCC3=Nc4ccccc4C35CCN(C1)C25	C19H24N2O	296.407	KNApSAcK
(20S,22R)-5beta,6beta-Epoxy-4beta,14beta,15alpha-trihydroxy-1-oxowith-2,24-dieno	CC(C1CC(=C(C)C(=O)O1)C)C2CC(O)C3(O)C4CC5OC56C(O)C=CC(=O)C6(C)C4CCC23C	C28H38O7	486.597	KNApSAcK
(22E)-Cholesta-4,6,8(14),22-tetraen-3-one	CC(C)C\C=C\C(C)C1CCC2=C3C=CC4=CC(=O)CCC4(C)C3CCC12C	C27H38O	378.59	KNApSAcK
(22E,24S)-Stigmast-4,22-dien-3-one	CCC(\C=C\C(C)C1CCC2C3CC=C4CC(=O)CCC4(C)C3CCC12C)C(C)C	C29H46O	410.675	KNApSAcK
(22E,24S)-Stigmasta-5,22-dien-3beta,7alpha-diol 7alpha-Hydroxystigmasterol Stigm	CCC(\C=C\C(C)C1CCC2C3C(O)C=C4CC(O)CCC4(C)C3CCC12C)C(C)C	C29H48O2	428.69	KNApSAcK
(22S)-22-Hydroxycampesterol	CC(C)C(C)CC(O)C(C)C1CCC2C3CC=C4CC(O)CCC4(C)C3CCC12C	C28H48O2	416.68	KNApSAcK
(22S,22R)-22-Hydroxyergost-4-en-3-one	CC(C)C(C)CC(O)C(C)C1CCC2C3CCC4=CC(=O)CCC4(C)C3CCC12C	C28H46O2	414.664	KNApSAcK
(22S,24R)-22-Hydroxy-5alpha-ergostan-3-one	CC(C)C(C)CC(O)C(C)C1CCC2C3CCC4CC(=O)CCC4(C)C3CCC12C	C28H48O2	416.68	KNApSAcK
(23E)-27-nor-3beta-Hydroxycycloart-23-en-25-one 27-Nor-3beta-hydroxycycloart-23-	CC(C\C=C\C(=O)C)C1CCC2(C)C3CCC4C(C)(C)C(O)CCC45CC35CCC12C	C29H46O2	426.674	KNApSAcK
(24R)-24-Hydroxy-24-vinyllathosterol	CC(C)C(O)(CCC(C)C1CCC2C3=CCC4CC(O)CCC4(C)C3CCC12C)C=C	C29H48O2	428.69	KNApSAcK
(24R)-24-Methyl-5-alpha-cholestan-3-one	CC(C)C(C)CCC(C)C1CCC2C3CCC4CC(=O)CCC4(C)C3CCC12C	C28H48O	400.68	KNApSAcK
(24R)-24-Methylcholest-4-en-3-beta-ol	CC(C)C(C)CCC(C)C1CCC2C3CCC4=CC(O)CCC4(C)C3CCC12C	C28H48O	400.68	KNApSAcK
(24R)-Ergost-4-en-3-one Campest-4-en-3-one	CC(C)C(C)CCC(C)C1CCC2C3CCC4=CC(=O)CCC4(C)C3CCC12C	C28H46O	398.664	KNApSAcK
(24S)24-Methylcholest-8-en-3beta-ol Ergost-8-en-3beta-ol	CC(C)C(C)CCC(C)C1CCC2C3=C(CCC12C)C4(C)CCC(O)CC4CC3	C28H48O	400.68	KNApSAcK
(24S)24-Methylcholesta-5,7-dien-3beta-ol Ergosta-5,7-dien-3beta-ol	CC(C)C(C)CCC(C)C1CCC2C3=CC=C4CC(O)CCC4(C)C3CCC12C	C28H46O	398.664	KNApSAcK
(24S)24-Methylcholesta-7,22-dien-3-one Ergosta-7,22-dien-3-one	CC(C)C(C)\C=C\C(C)C1CCC2C3=CCC4CC(=O)CCC4(C)C3CCC12C	C28H44O	396.648	KNApSAcK
(24Z)-29-Hydroxy-24(28)-dehydromakisterone C (+)-(24Z)-29-Hydroxy-24(28)-dehydro	CC(C)(O)\C(=C/CO)\CC(O)C(C)(O)C1CCC2(O)C3=CC(=O)C4CC(O)C(O)CC4(C)C3CCC12C	C29H46O8	522.671	KNApSAcK
(24Z)-3-Oxo-12alpha-hydroxylanosta-8,24-dien-26-oic acid	CC(CC\C=C(\C)/C(=O)O)C1CCC2(C)C3=C(CC(O)C12C)C4(C)CCC(=O)C(C)(C)C4CC3	C30H46O4	470.684	KNApSAcK
(25R)-3beta-Hydroxy-23-oxo-9,16-lanostadien-26-oic acid Garcihombronane D (+)-Ga	CC(CC(=O)CC(C)C1=CCC2(C)C3CCC4C(C)(C)C(O)CCC4(C)C3=CCC12C)C(=O)O	C30H46O4	470.684	KNApSAcK
(25S)-Kingianoside C	CC(CCC1(O)OC2CC3C4CC=C5CC(CCC5(C)C4CC(=O)C3(C)C2C1C)OC6OC(CO)C(OC7OC(CO)C(O)C(O)C7O)C(O)C6O)COC8OC(CO)C(O)C(O)C8O	C45H72O20	933.041	KNApSAcK
(25S)-Kingianoside E	CC(CCC1(O)OC2CC3C4CC=C5CC(CCC5(C)C4CC(=O)C3(C)C2C1C)OC6OC(CO)C(OC7OC(CO)C(O)C(O)C7OC8OC(CO)C(O)C(O)C8O)C(O)C6O)COC9OC(CO)C(O)C(O)C9O	C51H82O25	1095.18	KNApSAcK
(25S)-Kingianoside F	CC(CCC1(O)OC2CC3C4CC=C5CC(CC(O)C5(C)C4CCC3(C)C2C1C)OC6OC(CO)C(OC7OC(CO)C(O)C(O)C7OC8OC(CO)C(O)C(O)C8O)C(O)C6O)COC9OC(CO)C(O)C(O)C9O	C51H84O25	1097.2	KNApSAcK
(2alpha,13R)-2,13-Dihydroxy-8,14-labdadien-7-one	CC1=C(CCC(C)(O)C=C)C2(C)CC(O)CC(C)(C)C2CC1=O	C20H32O3	320.466	KNApSAcK
(2alpha,3alpha,4beta,5alpha)-(+)-7-Bromo-2,3,4,5-tetrahydro-4,5,8-trimethyl-2,5-	CC1C(C=O)C2CC1(C)c3cc(Br)c(C)cc3O2	C15H17BrO2	309.198	KNApSAcK
(2alpha,3beta,6alpha)-6-Ethenyltetrahydro-2,6-dimethyl-2-(4-methyl-3-pentenyl)-2	CC(=CCCC1(C)OC(C)(CCC1O)C=C)C	C15H26O2	238.366	KNApSAcK
(2alpha,5beta,10S)-(-)-7-bromo-4,5-dihydro-5,8,10-trimethyl-2,5-methano-1-benzox	CC1C2(C)CCC1(CO)Oc3cc(C)c(Br)cc23	C15H19BrO2	311.214	KNApSAcK
(2beta,13Z)-7,13-Labdadiene-2,15,16,17-tetrol	CC1(C)CC(O)CC2(C)C(CC\C(=C/CO)\CO)C(=CCC12)CO	C20H34O4	338.482	KNApSAcK
(2beta,5alpha,8beta,10alpha)-9(12)-Capnellene-2,5,8,10-tetrol	CC1(C)C(O)CC2(C)C(O)C3CC(O)C(=C)C3(O)C12	C15H24O4	268.349	KNApSAcK
(2E)-2,6-Dimethyl-2,5-heptadienoic acid beta-D-glucopyranosyl ester	CC(=CC\C=C(/C)\C(=O)OC1OC(CO)C(O)C(O)C1O)C	C15H24O7	316.347	KNApSAcK
(2E)-5,7-Dihydroxy-3,6-dimethoxy-4-oxo-2-phenyl-4H-1-benzopyran-8-yl ester 2-met	COC1=C(Oc2c(OC(=O)\C(=C\C)\C)c(O)c(OC)c(O)c2C1=O)c3ccccc3	C22H20O8	412.389	KNApSAcK
(2E,6R)-2,6-Dimethyl-8-hydroxy-2-octenoic acid 8-O-[6'-O-(E)-p-coumaroyl]-beta-D	COCC1OC(Oc2c3COC(=O)c3c(c4ccc5OCOc5c4)c6cc(OC)c(OC)cc26)C(OC)C1OC	C29H30O11	554.542	KNApSAcK
(2E,6S)- 6-[(1R,3aS,5Z,9R,10Z,12aR)-1,2,3,3a,4,7,8,9,12,12a-Decahydro-9-hydroxy-	CC(CC\C=C(/C)\C(=O)O)C1CCC2(C)C\C=C(\C)/CCC(O)\C(=C/CC12)\C	C25H40O3	388.583	KNApSAcK
(2E,6Z)-8-beta-D-glucopyranosyloxy-2,6-dimethyl-2,6-octadienoic acid	C\C(=C\COC1OC(CO)C(O)C(O)C1O)\CC\C=C(\C)/C(=O)O	C16H26O8	346.373	KNApSAcK
(2R)-2'-Hydroxymarmesin 2'-O-beta-D-glucopyranoside	CC(O)(COC1OC(CO)C(O)C(O)C1O)C2Cc3cc4C=CC(=O)Oc4cc3O2	C20H24O10	424.399	KNApSAcK
(2R)-2-Deoxymaesopsin-(2-}7)-(2R)-maesopsin	Oc1ccc(CC2(O)Oc3c(C2=O)c(O)cc(O)c3C4(Cc5ccc(O)cc5)Oc6cc(O)cc(O)c6C4=O)cc1	C30H22O11	558.489	KNApSAcK
(2R)-2-Hydroxy-beta,beta-caroten-4-one	C\C(=C/C=C/C=C(\C)/C=C/C=C(\C)/C=C/C1=C(C)C(=O)CC(O)C1(C)C)\C=C\C=C(/C)\C=C\C2=C(C)CCCC2(C)C	C40H54O2	566.856	KNApSAcK
(2R)-5,4'-Dihydroxy-7-methoxy-6-methylflavanone	COc1cc2OC(CC(=O)c2c(O)c1C)c3ccc(O)cc3	C17H16O5	300.306	KNApSAcK
(2R)-5,7,3',4'-Tetrahydroxyflavanone 6-C-glucoside	OCC1OC(C(O)C(O)C1O)c2c(O)cc3OC(CC(=O)c3c2O)c4ccc(O)c(O)c4	C21H22O11	450.393	KNApSAcK
(2R)-5-Hydroxy-7,2',3'-trimethoxyflavanone	COc1cc(O)c2C(=O)CC(Oc2c1)c3cccc(OC)c3OC	C18H18O6	330.332	KNApSAcK
(2R)-8-Methylsocotrin-4'-ol	COc1cc(O)ccc1CCC(c2ccc(O)cc2)c3cc4CCC(Oc4c(C)c3O)c5ccc(O)cc5	C32H32O6	512.593	KNApSAcK
(2R)-beta,beta-Caroten-2-ol	C\C(=C/C=C/C=C(\C)/C=C/C=C(\C)/C=C/C1=C(C)CCC(O)C1(C)C)\C=C\C=C(/C)\C=C\C2=C(C)CCCC2(C)C	C40H56O	552.872	KNApSAcK
(2R)-Naringenin 8-C-alpha-L-rhamnopyranosyl-(1-}2)-beta-D-glucopyranoside (+)-(2	CC1OC(OC2C(O)C(O)C(CO)OC2c3c(O)cc(O)c4C(=O)CC(Oc34)c5ccc(O)cc5)C(O)C(O)C1O	C27H32O14	580.535	KNApSAcK
(2R)-Pterosin B	CC1Cc2cc(C)c(CCO)c(C)c2C1=O	C14H18O2	218.292	KNApSAcK
(2R,2'R)-beta,beta-Carotene-2,2'-diol	C\C(=C/C=C/C=C(\C)/C=C/C=C(\C)/C=C/C1=C(C)CCC(O)C1(C)C)\C=C\C=C(/C)\C=C\C2=C(C)CCC(O)C2(C)C	C40H56O2	568.871	KNApSAcK
(2R,2'R,3S,3'R)-2,2',3,3'-Tetrahydroxy-beta,beta-caroten-4-one	C\C(=C/C=C/C=C(\C)/C=C/C=C(\C)/C=C/C1=C(C)C(=O)C(O)C(O)C1(C)C)\C=C\C=C(/C)\C=C\C2=C(C)CC(O)C(O)C2(C)C	C40H54O5	614.854	KNApSAcK
(2R,2'R,3S,3'S)-2,2',3,3'-Tetrahydroxy-beta,beta-carotene-4,4'-dione	C\C(=C/C=C/C=C(\C)/C=C/C=C(\C)/C=C/C1=C(C)C(=O)C(O)C(O)C1(C)C)\C=C\C=C(/C)\C=C\C2=C(C)C(=O)C(O)C(O)C2(C)C	C40H52O6	628.837	KNApSAcK
(2R,3R)-3,5,4'-Trihydroxy-7,3'-dimethoxy-6-prenylflavanone	COc1cc(ccc1O)C2Oc3cc(OC)c(CC=C(C)C)c(O)c3C(=O)C2O	C22H24O7	400.422	KNApSAcK
(2R,3R)-3,5,7,3',5'-Pentahydroxyflavan	OC1Cc2c(O)cc(O)cc2OC1c3cc(O)cc(O)c3	C15H14O6	290.268	KNApSAcK
(2R,3R)-3,5,7,3',5'-Pentahydroxyflavanone 3-rhamnoside	CC1OC(OC2C(Oc3cc(O)cc(O)c3C2=O)c4cc(O)cc(O)c4)C(O)C(O)C1O	C21H22O11	450.393	KNApSAcK
(2R,3R)-3,5,7,4'-Tetrahydroxyflavanone 7-(6-[4-Hydroxy-2-methylenebutanoyl]gluco	OCCC(=C)C(=O)OCC1OC(Oc2cc(O)c3C(=O)C(O)C(Oc3c2)c4ccc(O)cc4)C(O)C(O)C1O	C26H28O13	548.493	KNApSAcK
(2R,3R)-3,5,8-Trihydroxy-7-methoxyflavanone	COc1cc(O)c2C(=O)C(O)C(Oc2c1O)c3ccccc3	C16H14O6	302.279	KNApSAcK
(2R,3R)-3-Hydroxy-5,7,4'-trimethoxyflavanone	COc1ccc(cc1)C2Oc3cc(OC)cc(OC)c3C(=O)C2O	C18H18O6	330.332	KNApSAcK
(2R,3R)-5,2'-Dihydroxy-7,8-dimethoxy-3-O-acetylflavanone	COc1cc(O)c2C(=O)C(OC(=O)C)C(Oc2c1OC)c3ccccc3O	C19H18O8	374.341	KNApSAcK
(2R,3R)-Aromadendrin 7-methyl ether 3-acetate	COc1cc(O)c2C(=O)C(OC(=O)C)C(Oc2c1)c3ccc(O)cc3	C18H16O7	344.315	KNApSAcK
(2R,3R)-beta,beta-Carotene-2,3-diol	C\C(=C/C=C/C=C(\C)/C=C/C=C(\C)/C=C/C1=C(C)CC(O)C(O)C1(C)C)\C=C\C=C(/C)\C=C\C2=C(C)CCCC2(C)C	C40H56O2	568.871	KNApSAcK
(2R,3R)-fustin	OC1C(Oc2cc(O)ccc2C1=O)c3ccc(O)c(O)c3	C15H12O6	288.252	KNApSAcK
(2R,3R)-Lespedezaflavanone C Lespedezaflavanone C	CC(=CCc1cc(ccc1O)C2Oc3c(CC=C(C)C)c(O)cc(O)c3C(=O)C2O)C	C25H28O6	424.486	KNApSAcK
(2R,3R)-Pinobanksin 3-acetate	CC(=O)OC1C(Oc2cc(O)cc(O)c2C1=O)c3ccccc3	C17H14O6	314.289	KNApSAcK
(2R,3R)-Taxifolin 3-alpha-arabinopyranoside	OC1COC(OC2C(Oc3cc(O)cc(O)c3C2=O)c4ccc(O)c(O)c4)C(O)C1O	C20H20O11	436.366	KNApSAcK
(2R,3R)-Taxifolin 3-glucoside	OCC1OC(OC2C(Oc3cc(O)cc(O)c3C2=O)c4ccc(O)c(O)c4)C(O)C(O)C1O	C21H22O12	466.392	KNApSAcK
(2R,3S)-2,3-Dihydroxy-beta,beta-carotene-4,4'-dione	C\C(=C/C=C/C=C(\C)/C=C/C=C(\C)/C=C/C1=C(C)C(=O)C(O)C(O)C1(C)C)\C=C\C=C(/C)\C=C\C2=C(C)C(=O)CCC2(C)C	C40H52O4	596.838	KNApSAcK
(2R,3S)-3,5,3'-Trihydroxy-7,4'-dimethoxyflavanone	COc1cc(O)c2C(=O)C(O)C(Oc2c1)c3ccc(OC)c(O)c3	C17H16O7	332.305	KNApSAcK
(2R,3S)-3,5,7-Trihydroxy-6-geranylflavanone	CC(=CCC\C(=C\Cc1c(O)cc2OC(C(O)C(=O)c2c1O)c3ccccc3)\C)C	C25H28O5	408.487	KNApSAcK
(2R,3S)-3,5,7-Trihydroxy-6-prenylflavanone	CC(=CCc1c(O)cc2OC(C(O)C(=O)c2c1O)c3ccccc3)C	C20H20O5	340.37	KNApSAcK
(2R,3S)-3,7,8,3',4'-Pentahydroxyflavanone	OC1C(Oc2c(O)c(O)ccc2C1=O)c3ccc(O)c(O)c3	C15H12O7	304.252	KNApSAcK
(2R,3S)-3-Hydroxy-5,7-dimethoxyflavanone cis-3-Hydroxy-5,7-dimethoxyflavanone	COc1cc(OC)c2C(=O)C(O)C(Oc2c1)c3ccccc3	C17H16O5	300.306	KNApSAcK
(2R,3S)-Naringenin-(3alpha-}5)-(2R)-maesopsin	Oc1ccc(CC2(O)Oc3cc(O)c(C4C(Oc5cc(O)cc(O)c5C4=O)c6ccc(O)cc6)c(O)c3C2=O)cc1	C30H22O11	558.489	KNApSAcK
(2R,4R,6S)-6-Bromo-1,4-epoxy-3(8)-ochtoden-2-ol (3alpha,6beta,7aalpha)-(-)-6-bro	CC1(C)C=C2C(O)COC2CC1Br	C10H15BrO2	247.129	KNApSAcK
(2R,5S,6R)-5,6-Epoxy-5,6-dihydro-beta,beta-caroten-2-ol	C\C(=C/C=C/C=C(\C)/C=C/C=C(\C)/C=C/C12OC1(C)CCC(O)C2(C)C)\C=C\C=C(/C)\C=C\C3=C(C)CCCC3(C)C	C40H56O2	568.871	KNApSAcK
(2R,6'R)-beta,epsilon-Caroten-2-ol	C\C(=C/C=C/C=C(\C)/C=C/C=C(\C)/C=C/C1=C(C)CCC(O)C1(C)C)\C=C\C=C(/C)\C=C\C2C(=CCCC2(C)C)C	C40H56O	552.872	KNApSAcK
(2R-cis)-1,2,3,4,6,7,8,8a-Octahydro-5,8a-dimethyl-3-(1-methylethylidene)-2-napht	CC(=C1CC2C(=CCCC2(C)CC1O)C)C	C15H24O	220.35	KNApSAcK
(2R-cis)-2-(2,5-Dihydroxyphenyl)-3,4-dihydro-2H-1-benzopyran-3,5,7-triol	OC1Cc2c(O)cc(O)cc2OC1c3cc(O)ccc3O	C15H14O6	290.268	KNApSAcK
(2R-trans)-2-Butyl-5-heptyl-pyrrolidine (-)-Solenopsis fugax venom	CCCCCCCC1CCC(CCCC)N1	C15H31N	225.413	KNApSAcK
(2R-trans)-3,4,4a,5,6,7-Hexahydro-2-hydroxy-4a,8-dimethyl-2-(1-methylethyl)-1(2H	CC(C)C1(O)CCC2(C)CCCC(=C2C1=O)C	C15H24O2	236.35	KNApSAcK
(2S)-(-)-7,8-Dimethoxyplatydesmine 7,8-Dimethoxyplatydesmine	COc1ccc2c(OC)c3CC(Oc3nc2c1OC)C(C)(C)O	C17H21NO5	319.352	KNApSAcK
(2S)-2'-Methoxykurarinone (2S)-7,4'-Dihydroxy-8-lavandulyl-5,2'-dimethoxyflavano	COc1cc(O)ccc1C2CC(=O)c3c(OC)cc(O)c(CC(CC=C(C)C)C(=C)C)c3O2	C27H32O6	452.539	KNApSAcK
(2S)-4',5-Dihydroxy-7-methoxy-8-methylflavan	COc1cc(O)c2CCC(Oc2c1C)c3ccc(O)cc3	C17H18O4	286.322	KNApSAcK
(2S)-4',5-Dihydroxy-8-hydroxymethyl-6'',6''-dimethylpyrano[2'',3'' 7,6]flavanone	CC1(C)Oc2c(CO)c3OC(CC(=O)c3c(O)c2C=C1)c4ccc(O)cc4	C21H20O6	368.38	KNApSAcK
(2S)-4'-Hydroxy-5,7,3'-trimethoxyflavan (S)-4-(3,4-Dihydro-5,7-dimethoxy-2H-1-be	COc1cc(OC)c2CCC(Oc2c1)c3ccc(O)c(OC)c3	C18H20O5	316.348	KNApSAcK
(2S)-5,3'-Dihydroxy-4'-methoxy-6'',6''-dimethylpyrano[2'',3'' 7,8]flavanone	COc1ccc(cc1O)C2CC(=O)c3c(O)cc4OC(C)(C)C=Cc4c3O2	C21H20O6	368.38	KNApSAcK
(2S)-5,4'-Dihydroxy-7,3'-dimethoxyflavanone 4'-apiosyl-(1-}2)-glucoside	COc1cc(O)c2C(=O)CC(Oc2c1)c3ccc(OC4OC(CO)C(O)C(O)C4OC5OCC(O)(CO)C5O)c(OC)c3	C28H34O15	610.561	KNApSAcK
(2S)-5,6,7,3',4'-Pentamethoxyflavanone	COc1ccc(cc1OC)C2CC(=O)c3c(OC)c(OC)c(OC)cc3O2	C20H22O7	374.384	KNApSAcK
(2S)-5,6,7,8,4'-Pentamethoxyflavanone	COc1ccc(cc1)C2CC(=O)c3c(OC)c(OC)c(OC)c(OC)c3O2	C20H22O7	374.384	KNApSAcK
(2S)-5,6,7-Trihydroxyflavanone 7-glucoside	OCC1OC(Oc2cc3OC(CC(=O)c3c(O)c2O)c4ccccc4)C(O)C(O)C1O	C21H22O10	434.393	KNApSAcK
(2S)-5,7,2',4'-Tetrahydroxy-8-prenyl-5'-(1,1-dimethylallyl)flavanone	CC(=CCc1c(O)cc(O)c2C(=O)CC(Oc12)c3cc(c(O)cc3O)C(C)(C)C=C)C	C25H28O6	424.486	KNApSAcK
(2S)-5,7,2',5'-Tetrahydroxyflavanone 5,7,2',5'-Tetrahydroxyflavanone	Oc1ccc(O)c(c1)C2CC(=O)c3c(O)cc(O)cc3O2	C15H12O6	288.252	KNApSAcK
(2S)-5,7,2'-Trihydroxyflavanone 5,7,2'-Trihydroxyflavanone	Oc1cc(O)c2C(=O)CC(Oc2c1)c3ccccc3O	C15H12O5	272.253	KNApSAcK
(2S)-5,7,3',4'-Tetrahydroxy-6-(1,1-dimethylallyl)flavanone	CC(C)(C=C)c1c(O)cc2OC(CC(=O)c2c1O)c3ccc(O)c(O)c3	C20H20O6	356.369	KNApSAcK
(2S)-5,7,3',4'-Tetrahydroxyflavanone 3'-(6-p-coumaroylglucoside)	OC1C(COC(=O)\C=C\c2ccc(O)cc2)OC(Oc3cc(ccc3O)C4CC(=O)c5c(O)cc(O)cc5O4)C(O)C1O	C30H28O13	596.536	KNApSAcK
(2S)-5,7,3',4'-Tetrahydroxyflavanone 7-(6-galloylglucoside)	OC1C(O)C(COC(=O)c2cc(O)c(O)c(O)c2)OC(Oc3cc(O)c4C(=O)CC(Oc4c3)c5ccc(O)c(O)c5)C1O	C28H26O15	602.497	KNApSAcK
(2S)-5,7,3',4'-Tetrahydroxyflavanone 7-(6-p-coumaroylglucoside)	OC1C(COC(=O)\C=C\c2ccc(O)cc2)OC(Oc3cc(O)c4C(=O)CC(Oc4c3)c5ccc(O)c(O)c5)C(O)C1O	C30H28O13	596.536	KNApSAcK
(2S)-5,7,3',4'-Tetrahydroxyflavanone 7-glucuronide	OC1C(O)C(Oc2cc(O)c3C(=O)CC(Oc3c2)c4ccc(O)c(O)c4)OC(C1O)C(=O)O	C21H20O12	464.376	KNApSAcK
(2S)-5,7,4'-Trihydroxy-2'-methoxy-8-prenyl-5'-(1,1-dimethylallyl)flavanone	COc1cc(O)c(cc1C2CC(=O)c3c(O)cc(O)c(CC=C(C)C)c3O2)C(C)(C)C=C	C26H30O6	438.513	KNApSAcK
(2S)-5,7,4'-Trihydroxy-3'-methoxy-6-(1,1-dimethylallyl)flavanone	COc1cc(ccc1O)C2CC(=O)c3c(O)c(c(O)cc3O2)C(C)(C)C=C	C21H22O6	370.396	KNApSAcK
(2S)-5,7,4'-Trihydroxy-6-(1,1-dimethylallyl)flavanone	CC(C)(C=C)c1c(O)cc2OC(CC(=O)c2c1O)c3ccc(O)cc3	C20H20O5	340.37	KNApSAcK
(2S)-5,7-Dimethoxy-3',4'-methylenedioxyflavanone	COc1cc(OC)c2C(=O)CC(Oc2c1)c3ccc4OCOc4c3	C18H16O6	328.316	KNApSAcK
(2S)-5-Hydroxy-7-methoxy-8-[(E)-3-oxo-1-butenyl]flavanone	COc1cc(O)c2C(=O)CC(Oc2c1\C=C\C(=O)C)c3ccccc3	C20H18O5	338.354	KNApSAcK
(2S)-6-Geranylpinostrobin	COc1cc2OC(CC(=O)c2c(O)c1C\C=C(/C)\CCC=C(C)C)c3ccccc3	C26H30O4	406.514	KNApSAcK
(2S)-7,4'-Dihydroxy-3'-prenylflavan (-)-(2S)-7,4'-Dihydroxy-3'-prenylflavan	CC(=CCc1cc(ccc1O)C2CCc3ccc(O)cc3O2)C	C20H22O3	310.387	KNApSAcK
(2S)-7,4'-Dihydroxyflavan	Oc1ccc(cc1)C2CCc3ccc(O)cc3O2	C15H14O3	242.27	KNApSAcK
(2S)-Eriodictyol 7-O-beta-D-glucopyranoside Eriodictyol 7-O-glucoside Miscanthos	OCC1OC(Oc2cc(O)c3C(=O)CC(Oc3c2)c4ccc(O)c(O)c4)C(O)C(O)C1O	C21H22O11	450.393	KNApSAcK
(2S)-Euchrenone a7 (-)-(2S)-Euchrenone a7 Euchrenone a7	CC(=CCc1c(O)ccc2C(=O)CC(Oc12)c3ccc(O)cc3O)C	C20H20O5	340.37	KNApSAcK
(2S)-Hydroxy-3,4-dehydroneomajucin (-)-(2S)-Hydroxy-3,4-dehydroneomajucin	CC1C(O)C=C2C3(C)COC(=O)C3(O)C4CC12C(O)C(=O)O4	C15H18O7	310.299	KNApSAcK
(2S)-Pinocembrin (-)-(2S)-Pinocembrin Pinostrobin (-)-Pinostrobin	COc1cc(O)c2C(=O)CC(Oc2c1)c3ccccc3	C16H14O4	270.28	KNApSAcK
(2S)-Poncirenin Isosakuranin Poncirenin	COc1ccc(cc1)C2CC(=O)c3c(O)cc(OC4OC(CO)C(O)C(O)C4O)cc3O2	C22H24O10	448.42	KNApSAcK
(2S)-Sambunigrin Sambunigrin (S)-Prunasin	OCC1OC(OC(C#N)c2ccccc2)C(O)C(O)C1O	C14H17NO6	295.288	KNApSAcK
(2S,3R)-Dihydrodehydrodiconiferyl alcohol beta-D-glucoside	COc1cc(ccc1OC2OC(CO)C(O)C(O)C2O)C3Oc4c(OC)cc(CCCO)cc4C3CO	C26H34O11	522.542	KNApSAcK
(2S,3R)-Dihydrogenistein-(2alpha-}7)-(2R)-maesopsin	Oc1ccc(CC2(O)Oc3c(C4Oc5cc(O)cc(O)c5C(=O)C4c6ccc(O)cc6)c(O)cc(O)c3C2=O)cc1	C30H22O11	558.489	KNApSAcK
(2S,4R)-4,5,6,7-Tetramethoxyflavan (+)-(2S,4R)-4,5,6,7-Tetramethoxyflavan	COC1CC(Oc2cc(OC)c(OC)c(OC)c12)c3ccccc3	C19H22O5	330.375	KNApSAcK
(2S,4R)-5,6,7-Trimethoxyflavan-4-ol (+)-(2S,4R)-5,6,7-Trimethoxyflavan-4-ol	COc1cc2OC(CC(O)c2c(OC)c1OC)c3ccccc3	C18H20O5	316.348	KNApSAcK
(2S,4S)-gamma-Hydroxyglutamic acid Justiciamide	COc1cc(O)c(NC(=O)C(O)CC(N)C(=O)O)cc1OC	C13H18N2O7	314.291	KNApSAcK
(2S,4S,5R)-20-De(1-hydroxypropyl)-6-demethyl-6-ethyl-5-hydroxy-20-(1-hydroxypent	CCCCC(O)C1(CC)CC(C)C(O)(O1)C2(C)CC(C)C(O2)C(CC)C(=O)C(C)C(O)C(C)C3OC(O)(C(C)C(=O)O)C(C)C(O)C3CC	C38H68O11	700.94	KNApSAcK
(2S,4S,5S,7S)-10-Hydroxy-7-isopropyl-2-methoxy-4-methyl-1-oxaspiro[4,6]undec-10-	COC1CC(C)C2(CC(C(C)C)C(=O)CC(=C2)CO)O1	C16H26O4	282.375	KNApSAcK
(2S-cis)-1,2,3,4,4a,5,6,7-Octahydro-4a,8-dimethyl-alpha-methylene-4-oxo-2-naphth	CC1=C2CC(CC(=O)C2(C)CCC1)C(=C)C(=O)O	C15H20O3	248.317	KNApSAcK
(2S-cis)-5-(Acetyloxy)-5-methyl-2-(1-methylethyl)-cyclohexanone 1-Acetoxy-p-ment	CC(C)C1CCC(C)(CC1=O)OC(=O)C	C12H20O3	212.285	KNApSAcK
(2S-trans)-4-Methyl-1-(2,3,4,5-tetrahydro-5-methyl[2,3'-bifuran]-5-yl)-3-penten-	CC(=CC(=O)CC1(C)CCC(O1)c2cocc2)C	C15H20O3	248.317	KNApSAcK
(2Z,3S,4S)-2-(11-Dodecenylidene)-3-hydroxy-4-methylbutanolide (-)-(2Z,3S,4S)-2-(	CC1OC(=O)\C(=C/CCCCCCCCCC=C)\C1O	C17H28O3	280.402	KNApSAcK
(3'R)-Stemofolenol (-)-(3'R)-Stemofolenol	COC1=C(C)C(=O)O/C/1=C/2\OC34OC5CC(C3C2C)N6CCC4C56\C=C/C(C)O	C22H27NO6	401.453	KNApSAcK
(3'R,4'R)-3'-Epoxyangeloyloxy-4'-acetoxy-3'4'-dihydroseselin	CC1OC1(C)C(=O)OC2C(OC(=O)C)c3c(OC2(C)C)ccc4C=CC(=O)Oc34	C21H22O8	402.395	KNApSAcK
(3'R,6'S)-beta,epsilon-Caroten-3'-ol	C\C(=C/C=C/C=C(\C)/C=C/C=C(\C)/C=C/C1=C(C)CCCC1(C)C)\C=C\C=C(/C)\C=C\C2C(=CC(O)CC2(C)C)C	C40H56O	552.872	KNApSAcK
(3'R,6S,6'S)-3'-Hydroxy-epsilon,epsilon-Caroten-3-one	C\C(=C/C=C/C=C(\C)/C=C/C=C(\C)/C=C/C1C(=CC(=O)CC1(C)C)C)\C=C\C=C(/C)\C=C\C2C(=CC(O)CC2(C)C)C	C40H54O2	566.856	KNApSAcK
(3'Z,5'Z)-Celaxanthin	CC(=C\C=C/C(=C\C=C\C(=C\C=C\C(=C\C=C\C=C(/C)\C=C\C=C(/C)\C=C\C1=C(C)CC(O)CC1(C)C)\C)\C)/C)C	C40H54O	550.856	KNApSAcK
(3'Z,5'Z)-Torulene	CC(=C\C=C/C(=C\C=C\C(=C\C=C\C(=C\C=C\C=C(/C)\C=C\C=C(/C)\C=C\C1=C(C)CCCC1(C)C)\C)\C)/C)C	C40H54	534.857	KNApSAcK
(3alpha,4beta)-4,15-bis(Acetyloxy)-12,13-epoxy-3-hydroxytrichothec-9-en-8-one	CC(=O)OCC12CC(=O)C(=CC1OC3C(O)C(OC(=O)C)C2(C)C34CO4)C	C19H24O8	380.389	KNApSAcK
(3alpha,4beta,7alpha)12,13-Epoxy-trichothec-9-ene-3,4,7,15-tetrol 4,15-diacetate	CC(=O)OCC12C(O)CC(=CC1OC3C(O)C(OC(=O)C)C2(C)C34CO4)C	C19H26O8	382.405	KNApSAcK
(3alpha,4beta,7alpha,8alpha)-12,13-Epoxytrichothec-9-ene-3,4,7,8,15-pentol 4,15-	CC(=O)OCC12C(O)C(O)C(=CC1OC3C(O)C(OC(=O)C)C2(C)C34CO4)C	C19H26O9	398.404	KNApSAcK
(3aR,4R,6E,10E,11aR)-10-[(Acetyloxy)methyl]-6-formyl-2,3,3a,4,5,8,9,11a-octahydr	CCC(C)C(=O)OC1C\C(=C/CC\C(=C/C2OC(=O)C(=C)C12)\COC(=O)C)\C=O	C22H28O7	404.454	KNApSAcK
(3aR,4R,6E,10Z,11aR)-6-Formyl-2,3,3a,4,5,8,9,11a-octahydro-10-(hydroxymethyl)-3-	CC(C)CC(=O)OC1C\C(=C/CC\C(=C\C2OC(=O)C(=C)C12)\CO)\C=O	C20H26O6	362.417	KNApSAcK
(3beta)-28-Norlup-20(29)-ene-3,17-diol 3-acetate	CC(=C)C1CCC2(O)CCC3(C)C(CCC4C5(C)CCC(OC(=O)C)C(C)(C)C5CCC34C)C12	C31H50O3	470.727	KNApSAcK
(3beta)-28-Norlup-20(29)-ene-3,17-diol	CC(=C)C1CCC2(O)CCC3(C)C(CCC4C5(C)CCC(O)C(C)(C)C5CCC34C)C12	C29H48O2	428.69	KNApSAcK
(3beta,4alpha,22beta)-22-[[2-O-(6-Deoxy-alpha-L-mannopyranosyl)-alpha-L-arabinop	CC1OC(OC2C(O)C(O)COC2OC3CC(C)(C)CC4C5=CCC6C7(C)CCC(OC8OC(C(O)C(O)C8OC9OC(CO)C(O)C(O)C9OC%10OC(C)C(O)C(O)C%10O)C(=O)O)C(C)(CO)C7CCC6(C)C5(C)CCC34C)C(O)C(O)C1O	C59H96O26	1221.38	KNApSAcK
(3beta,4alpha,22beta)-22-[[2-O-(6-Deoxy-alpha-L-mannopyranosyl)-beta-D-glucopyra	CC1OC(OC2C(O)C(O)C(CO)OC2OC3C(O)C(O)C(OC3OC4CCC5(C)C(CCC6(C)C5CC=C7C8CC(C)(C)CC(OC9OC(CO)C(O)C(O)C9OC%10OC(C)C(O)C(O)C%10O)C8(C)CCC67C)C4(C)CO)C(=O)O)C(O)C(O)C1O	C60H98O27	1251.4	KNApSAcK
(3beta,8beta,10alpha)-9(12)-Capnellene-3,8,10,14-tetrol	CC1(CO)CC(O)C2(C)CC3CC(O)C(=C)C3(O)C12	C15H24O4	268.349	KNApSAcK
(3E)-Dactomelyne	CCC1OC2CC(Cl)C(C\C=C\C#C)OC2CC1Br	C15H20BrClO2	347.675	KNApSAcK
(3E)-Deacetylkumausyne (+)-Deacetylkumausyne trans-Deacetylkumausyne	CC\C=C\CC(Br)C1CC(O)C(C\C=C\C#C)O1	C15H21BrO2	313.23	KNApSAcK
(3E,7E,11E)-18-Hydroxy-3,7,11,15(17)-cembratetraen-16,14-olide	C\C\1=C\CC\C(=C\CC2C(C\C(=C\CC1)\C)OC(=O)C2=C)\CO	C20H28O3	316.435	KNApSAcK
(3R)-1-Octen-3-yl-beta-primeveroside	CCCCCC(OC1OC(COC2OCC(O)C(O)C2O)C(O)C(O)C1O)C=C	C19H34O10	422.467	KNApSAcK
(3R)-2'-Hydroxy-7,3',4'-trimethoxyisoflavan	COc1ccc2CC(COc2c1)c3ccc(OC)c(OC)c3O	C18H20O5	316.348	KNApSAcK
(3R)-3',4',7',8'-tetradehydro-beta,beta-Caroten-3-ol	C\C(=C/C=C/C=C(\C)/C=C/C=C(\C)/C#CC1=C(C)C=CCC1(C)C)\C=C\C=C(/C)\C=C\C2=C(C)CC(O)CC2(C)C	C40H52O	548.84	KNApSAcK
(3R)-3',8-Dihydroxyvestitol (3R)-7,8,2',3'-Tetrahydroxy-4'-methoxyisoflavan	COc1ccc(C2COc3c(C2)ccc(O)c3O)c(O)c1O	C16H16O6	304.295	KNApSAcK
(3R)-3,4-Dihydro-3-(3-hydroxy-2,4-dimethoxyphenyl)-8-(3-methyl-2-butenyl)-2H-1-b	COc1ccc(C2COc3c(C2)ccc(O)c3CC=C(C)C)c(OC)c1O	C22H26O5	370.439	KNApSAcK
(3R)-3-(beta-D-glucopyranosyloxy)-4-hydroxybutanoic acid	OCC(CC(=O)O)OC1OC(CO)C(O)C(O)C1O	C10H18O9	282.245	KNApSAcK
(3R)-3-Hydroxyretinal Apo-15-zeaxanthinal	C\C(=C/C=O)\C=C\C=C(/C)\C=C\C1=C(C)CC(O)CC1(C)C	C20H28O2	300.435	KNApSAcK
(3R)-3-Methoxyminimiflorin 5,2'-Dihydroxy-3-methoxy-8-prenyl-6'',6''-dimethylpyr	COC1C(Oc2c(CC=C(C)C)c3OC(C)(C)C=Cc3c(O)c2C1=O)c4ccccc4O	C26H28O6	436.497	KNApSAcK
(3R)-4'-Methoxy-3,7,2'-trihydroxyisoflavanone	COc1ccc(c(O)c1)C2(O)COc3cc(O)ccc3C2=O	C16H14O6	302.279	KNApSAcK
(3R)-5,7,2',3'-Tetrahydroxy-4'-methoxy-5'-prenylisoflavanone	COc1c(O)c(O)c(cc1CC=C(C)C)C2COc3cc(O)cc(O)c3C2=O	C21H22O7	386.395	KNApSAcK
(3R)-7',8'-Dihydro-beta-cryptoxanthin	C\C(=C/C=C/C(=C/C=C/C=C(\C)/C=C/C=C(\C)/C=C/C1=C(C)CC(O)CC1(C)C)/C)\CCC2=C(C)CCCC2(C)C	C40H58O	554.888	KNApSAcK
(3R)-7,2',3'-Trihydroxy-4'-methoxyisoflavanone	COc1ccc(C2COc3cc(O)ccc3C2=O)c(O)c1O	C16H14O6	302.279	KNApSAcK
(3R)-7,2',5'-Trihydroxy-3',4'-dimethoxyisoflavan 2',5'-O-diglucoside	COc1c(OC2OC(CO)C(O)C(O)C2O)cc(C3COc4cc(O)ccc4C3)c(OC5OC(CO)C(O)C(O)C5O)c1OC	C29H38O16	642.602	KNApSAcK
(3R)-7,2'-Dihydroxy-3',4'-dimethoxyisoflavan 7,2'-O-diglucoside	COc1ccc(C2COc3cc(OC4OC(CO)C(O)C(O)C4O)ccc3C2)c(OC5OC(CO)C(O)C(O)C5O)c1OC	C29H38O15	626.603	KNApSAcK
(3R)-7,2,3'-Trihydroxy-4'-methoxy-5'-prenylisoflavanone (+)-(3R)-7,2,3'-Trihydro	COc1c(O)c(O)c(cc1CC=C(C)C)C2COc3cc(O)ccc3C2=O	C21H22O6	370.396	KNApSAcK
(3R)-7,8,3',4',7',8'-Hexadehydro-beta,beta-caroten-3-ol	C\C(=C/C=C/C=C(\C)/C=C/C=C(\C)/C#CC1=C(C)C=CCC1(C)C)\C=C\C=C(/C)\C#CC2=C(C)CC(O)CC2(C)C	C40H50O	546.824	KNApSAcK
(3R)-8,2'-Dihydroxy-7,4'-dimethoxyisoflavan	COc1ccc(C2COc3c(C2)ccc(OC)c3O)c(O)c1	C17H18O5	302.322	KNApSAcK
(3R)-Colutehydroquinone (3R)-2',5'-Dihydroxy-7,3',4'-trimethoxyisoflavan	COc1ccc2CC(COc2c1)c3cc(O)c(OC)c(OC)c3O	C18H20O6	332.348	KNApSAcK
(3R)-Deoxypumiloside 3(R)-Deoxypumiloside Deoxypumiloside	OCC1OC(OC2OC=C3C(CC4N(Cc5cc6ccccc6nc45)C3=O)C2C=C)C(O)C(O)C1O	C26H28N2O8	496.509	KNApSAcK
(3R)-Vestitol 7-O-glucoside	COc1ccc(C2COc3cc(OC4OC(CO)C(O)C(O)C4O)ccc3C2)c(O)c1	C22H26O9	434.436	KNApSAcK
(3R,3'R)-Astaxanthin (3R,3'R)-3,3'-Dihydroxy-beta,beta-carotene-4,4'-dione	C\C(=C/C=C/C=C(\C)/C=C/C=C(\C)/C=C/C1=C(C)C(=O)C(O)CC1(C)C)\C=C\C=C(/C)\C=C\C2=C(C)C(=O)C(O)CC2(C)C	C40H52O4	596.838	KNApSAcK
(3R,3'R,4R,4'R)-rel-(+)-3,3',4,4'-Tetrahydro-7,7'-dihydroxy-4,4'-bis(4-hydroxyph	Oc1ccc(cc1)C2C(C3C(c4ccc(O)cc4)c5ccc(O)cc5OC3=O)C(=O)Oc6cc(O)ccc26	C30H22O8	510.491	KNApSAcK
(3R,3'R,6'S)-beta,epsilon-Carotene-3,3'-diol	C\C(=C/C=C/C=C(\C)/C=C/C=C(\C)/C=C/C1=C(C)CC(O)CC1(C)C)\C=C\C=C(/C)\C=C\C2C(=CC(O)CC2(C)C)C	C40H56O2	568.871	KNApSAcK
(3R,3'S)-Zeaxanthin	C\C(=C/C=C/C=C(\C)/C=C/C=C(\C)/C=C/C1=C(C)CC(O)CC1(C)C)\C=C\C=C(/C)\C=C\C2=C(C)CC(O)CC2(C)C	C40H56O2	568.871	KNApSAcK
(3R,4R)-Piperitol (+)-trans-Piperitol	CC(C)C1CCC(=CC1O)C	C10H18O	154.249	KNApSAcK
(3R,4R,6S)-3,4-Epoxybisabola-7(14),10-dien-2-one (-)-(3R,4R,6S)-3,4-Epoxybisabol	CC(=CCCC(=C)C1CC2OC2(C)C(=O)C1)C	C15H22O2	234.334	KNApSAcK
(3R,4R,7R,8R,12R)-ent-3,4 7,8-Diepoxyverticillan-12-ol Verticillol bis epoxide V	CC1(O)CCC2CC3OC3(C)CCC4OC4(C)CCC1C2(C)C	C20H34O3	322.482	KNApSAcK
(3R,5R)-1-(4-Hydroxyphenyl)-7-phenyl-3,5-heptanediol	OC(CCc1ccccc1)CC(O)CCc2ccc(O)cc2	C19H24O3	300.392	KNApSAcK
(3R,6'R)-7,8-Didehydro-beta,epsilon-caroten-3-ol	C\C(=C/C=C/C=C(\C)/C=C/C=C(\C)/C#CC1=C(C)CC(O)CC1(C)C)\C=C\C=C(/C)\C=C\C2C(=CCCC2(C)C)C	C40H54O	550.856	KNApSAcK
(3R-trans)-2,3,4,4a,5,6-Hexahydro-3-hydroxy-4a-methyl-7-(1-methylethyl)-1-naphth	CC(C)C1=CC2=C(CC(O)CC2(C)CC1)C=O	C15H22O2	234.334	KNApSAcK
(3R-trans)-3-Ethenyl-3-methyl-4-(1-methylethenyl)-6-(1-methylethylidene)-cyclohe	CC(=C1CC(C(=C)C)C(C)(C=C)C=C1)C	C15H22	202.335	KNApSAcK
(3S)-3,7,2',3'-Tetrahydroxy-4'-methoxy-5'-prenylisoflavanone	COc1c(O)c(O)c(cc1CC=C(C)C)C2(O)COc3cc(O)ccc3C2=O	C21H22O7	386.395	KNApSAcK
(3S)-7,3'-Dihydroxy-8,2',4',5'-tetramethoxyisoflavan	COc1cc(C2COc3c(C2)ccc(O)c3OC)c(OC)c(O)c1OC	C19H22O7	362.374	KNApSAcK
(3S)-7-Hydroxy-8,2',3',4',5'-pentamethoxyisoflavan	COc1cc(C2COc3c(C2)ccc(O)c3OC)c(OC)c(OC)c1OC	C20H24O7	376.4	KNApSAcK
(3S)-Pterosin D	Cc1cc2C(O)C(C)(C)C(=O)c2c(C)c1CCO	C15H20O3	248.317	KNApSAcK
(3S)-Sativanone (+)-(3S)-Sativanone	COc1ccc(C2COc3cc(O)ccc3C2=O)c(OC)c1	C17H16O5	300.306	KNApSAcK
(3S)-Secundiflorol H	COc1ccc(C2COc3cc(O)cc(O)c3C2=O)c(OC)c1O	C17H16O7	332.305	KNApSAcK
(3S)-Violanone	COc1ccc(C2COc3cc(O)ccc3C2=O)c(OC)c1O	C17H16O6	316.305	KNApSAcK
(3S,3'R)-Adonixanthin 3-beta-D-glucoside (3S,3'R)-3-(beta-D-Glucopyranosyloxy)-3	C\C(=C/C=C/C=C(\C)/C=C/C=C(\C)/C=C/C1=C(C)C(=O)C(CC1(C)C)OC2OC(CO)C(O)C(O)C2O)\C=C\C=C(/C)\C=C\C3=C(C)CC(O)CC3(C)C	C46H64O8	744.996	KNApSAcK
(3S,3'R,4R)-beta,beta-Carotene-3,3',4-triol	C\C(=C/C=C/C=C(\C)/C=C/C=C(\C)/C=C/C1=C(C)C(O)C(O)CC1(C)C)\C=C\C=C(/C)\C=C\C2=C(C)CC(O)CC2(C)C	C40H56O3	584.871	KNApSAcK
(3S,3'R,4R,6'R)-beta,epsilon-Carotene-3,3',4-triol	C\C(=C/C=C/C=C(\C)/C=C/C=C(\C)/C=C/C1=C(C)C(O)C(O)CC1(C)C)\C=C\C=C(/C)\C=C\C2C(=CC(O)CC2(C)C)C	C40H56O3	584.871	KNApSAcK
(3S,3'R,5S,6S)-5,6-Dihydro-3,3',5,6-tetrahydroxy-beta,beta-carotene	C\C(=C/C=C/C=C(\C)/C=C/C=C(\C)/C=C/C1(O)C(C)(C)CC(O)CC1(C)O)\C=C\C=C(/C)\C=C\C2=C(C)CC(O)CC2(C)C	C40H58O4	602.886	KNApSAcK
(3S,3'S,4'R)-4-keto-4'-Hydroxyalloxanthin (3S,3'S,4'R)-7,7',8,8'-Tetradehydro-3,	C\C(=C/C=C/C=C(\C)/C=C/C=C(\C)/C#CC1=C(C)C(=O)C(O)CC1(C)C)\C=C\C=C(/C)\C#CC2=C(C)C(O)C(O)CC2(C)C	C40H50O4	594.823	KNApSAcK
(3S,3'S,4'R)-4-Keto-4'-hydroxydiatoxanthin (3S,3'S,4'R)-7',8'-Didehydro-3,3',4'-	C\C(=C/C=C/C=C(\C)/C=C/C=C(\C)/C#CC1=C(C)C(O)C(O)CC1(C)C)\C=C\C=C(/C)\C=C\C2=C(C)C(=O)C(O)CC2(C)C	C40H52O4	596.838	KNApSAcK
(3S,3'S,4R,4'R)-Crustaxanthin	C\C(=C/C=C/C=C(\C)/C=C/C=C(\C)/C=C/C1=C(C)C(O)C(O)CC1(C)C)\C=C\C=C(/C)\C=C\C2=C(C)C(O)C(O)CC2(C)C	C40H56O4	600.87	KNApSAcK
(3S,3'S,5'R)-4,5'-Retro-beta,beta-Carotene-3,3',5'-triol	CC1OC(OC(\C=C\C(=C\C=C\C(=C\C=C\C(=C\C=C\C=C(/C)\C=C\C=C(/C)\C=C\C2=C(C)CC(O)CC2(C)C)\C)\C)\C)C(C)(C)O)C(O)C(O)C1O	C46H66O7	731.012	KNApSAcK
(3S,3'S,5R,5'R,6S,6'R)-6,7-Didehydro-5,5',6,6'-tetrahydro-3,3',5,5',6'-pentahydr	C\C(=C/C=C/C=C(\C)/C=C/C=C(\C)/C=C=C1C(C)(C)CC(O)CC1(C)O)\C=C\C=C(/C)\C=C\C2(O)C(C)(C)CC(O)CC2(C)O	C40H58O5	618.886	KNApSAcK
(3S,4R)-6-Acetyl-3,4-dihydroxy-2,2-dimethylchromane (+)-(3S,4R)-6-Acetyl-3,4-dih	CC(=O)c1ccc2OC(C)(C)C(O)C(O)c2c1	C13H16O4	236.264	KNApSAcK
(3S,4R,3'R)-4-Hydroxyalloxanthin (3S,3'R,4R)-7,7',8,8'-Tetradehydro-beta,beta-ca	C\C(=C/C=C/C=C(\C)/C=C/C=C(\C)/C#CC1=C(C)C(O)C(O)CC1(C)C)\C=C\C=C(/C)\C#CC2=C(C)CC(O)CC2(C)C	C40H52O3	580.839	KNApSAcK
(3S,4R,5S,6S,3'S,4'R,5'S,6'S)-5,6,5',6'-tetrahydro-beta,beta-carotene-3,4,3',4'-	CC1C(O)C(O)CC(C)(C)C1\C=C\C(=C\C=C\C(=C\C=C\C=C(/C)\C=C\C=C(/C)\C=C\C2C(C)C(O)C(O)CC2(C)C)\C)\C	C40H60O4	604.902	KNApSAcK
(3S,4R,5S,6S,4'S,5'S,6'S)-5,6,5',6'-Tetrahydro-beta,beta-carotene-3,4,4'-triol	CC1C(O)CCC(C)(C)C1\C=C\C(=C\C=C\C(=C\C=C\C=C(/C)\C=C\C=C(/C)\C=C\C2C(C)C(O)C(O)CC2(C)C)\C)\C	C40H60O3	588.903	KNApSAcK
(3S,4S)-3,4-trans-2',7-Dihydroxy-4'-methoxy-4-[(3S)-2',7-dihydroxy-4'-methoxyiso	COc1ccc(C2COc3cc(O)ccc3C2c4cc(C5COc6cc(O)ccc6C5)c(O)cc4OC)c(O)c1	C32H30O8	542.576	KNApSAcK
(3S,4S,6R)-p-Menth-1-ene-3,6-diol	CC(C)C1CC(O)C(=CC1O)C	C10H18O2	170.249	KNApSAcK
(3S,5R,6S)-5,6-Epoxy-5,6-dihydro-3-hydroxy-8'-apo-beta,psi-carotenal	C\C(=C/C=C/C(=C/C=C/C=C(\C)/C=C/C=C(\C)/C=C/C12OC1(C)CC(O)CC2(C)C)/C)\C=O	C30H40O3	448.637	KNApSAcK
(3S,5R,6S,9R)-Megastigman-3,9-diol	CC(O)CCC1C(C)CC(O)CC1(C)C	C13H26O2	214.344	KNApSAcK
(3S,5R,8S)-5,8-Epoxy-5,8-dihydro-beta,beta-caroten-3-ol	C\C(=C/C=C/C=C(\C)/C=C/C=C(\C)/C1OC2(C)CC(O)CC(C)(C)C2=C1)\C=C\C=C(/C)\C=C\C3=C(C)CCCC3(C)C	C40H56O2	568.871	KNApSAcK
(3S,5S)-trans-3,5-dihydroxy-1,7-diphenyl-1-heptene	OC(CCc1ccccc1)CC(O)\C=C\c2ccccc2	C19H22O2	282.377	KNApSAcK
(3Z)-Chlorofucin (-)-(3Z)-Chlorofucin	CCC1OC2CC(OC2C\C=C/C#C)C(Cl)CC1Br	C15H20BrClO2	347.675	KNApSAcK
(3Z)-Isoprelaurefucin	CCC(Br)C1CC(Br)C2CC(O1)C(C\C=C/C#C)O2	C15H20Br2O2	392.126	KNApSAcK
(4''',5'',7-Trihydroxy-4',5,7''-trimethoxy-3,6''-bi-flavone)-3'''-O-4'''-(5,5'',	COc1ccc(cc1)C2=C(C(=O)c3c(OC)cc(O)cc3O2)c4c(O)c5C(=O)C=C(Oc5cc4OC)c6ccc(O)c(Oc7ccc(cc7)c8oc9c(O)c%10C(=O)C=C(Oc%10cc9c8C(=O)c%11c(O)cc(O)cc%11OC)c%12ccc(OC)c(OC)c%12)c6	C66H46O21	1175.06	KNApSAcK
(4'S,5'S,6'S)-4'-Hydroxy-5',6'-dihydro-beta,beta-caroten-4-one	CC1C(O)CCC(C)(C)C1\C=C\C(=C\C=C\C(=C\C=C\C=C(/C)\C=C\C=C(/C)\C=C\C2=C(C)C(=O)CCC2(C)C)\C)\C	C40H56O2	568.871	KNApSAcK
(4,4'-Dihydroxy-2,2'-dimethyl-3,3',6,6'-tetraoxo[1,1'-bi-1,4-cyclohexadien-1-yl]	CCC(C)C(=O)OC\C(=C/CCC(C)C1=C(O)C(=O)C(=C(C1=O)C2=C(C)C(=O)C(=C(C(C)CC\C=C(\C)/COC(=O)C(C)CC)C2=O)O)C)\C	C40H54O10	694.851	KNApSAcK
(4alpha,4aalpha,5alpha,7alpha,8beta,8abeta)-(-)-7-Hydroxy-4,4a,5,6,7,8,8a,9-octa	CC(C)C(=O)OC1c2c(C)coc2C(=O)C3C(OC(=O)C=C(C)C)C(O)CC(C)C13C	C24H32O7	432.507	KNApSAcK
(4aR-cis)-4a,5,6,7,8,8a-Hexahydro-4,8a-dimethyl-6-(1-methylethylidene)-2(1H)-nap	CC(=C1CCC2(C)CC(=O)C=C(C)C2C1)C	C15H22O	218.335	KNApSAcK
(4aR-cis)-4a,5,6,7-Tetrahydro-3,4a,5-trimethyl-naphtho[2,3-b]furan-8(4H)-one	CC1CCC(=O)C2=Cc3occ(C)c3CC12C	C15H18O2	230.302	KNApSAcK
(4aR-trans)-1,2,3,4,4a,7,8,8a-Octahydro-4a-methyl-1-methylene-7-(1-methylethylid	CC(=C1CC2C(=C)CCCC2(C)C=C1)C	C15H22	202.335	KNApSAcK
(4aS-trans)-4,4a,5,6,7,8-hexahydro-4a,8-dimethyl-2(3H)-Naphthalenone (+)-(6S,10S	CC1CCCC2(C)CCC(=O)C=C12	C12H18O	178.271	KNApSAcK
(4R)-4,8-Dihydroxy-alpha-tetralone	OC1CCC(=O)c2c(O)cccc12	C10H10O3	178.185	KNApSAcK
(4R)-4-Hydroxyipecoside (-)-(4R)-4-Hydroxyipecoside	COC(=O)C1=COC(OC2OC(CO)C(O)C(O)C2O)C(C=C)C1CC3N(CC(O)c4cc(O)c(O)cc34)C(=O)C	C27H35NO13	581.566	KNApSAcK
(4R)-4-Hydroxymethylboschnialactone	CC1CCC2C1COC(=O)C2CO	C10H16O3	184.232	KNApSAcK
(4R)-5-Hydroxy-4-methoxy-alpha-tetralone	COC1CCC(=O)c2c(O)ccc(O)c12	C11H12O4	208.211	KNApSAcK
(4R,6S,8S)-6-Bromo-1,4-epoxy-2-ochtoden-8-ol (4alpha,6beta,7aalpha)-(+)-6-bromo-	CC1(C)C(Br)CC2OCC=C2C1O	C10H15BrO2	247.129	KNApSAcK
(4R-cis)-3-Methylene-6-(1-methylethyl)-4-nitrocyclohexene	CC(C)C1CC(C(=C)C=C1)[N+](=O)[O-]	C10H15NO2	181.232	KNApSAcK
(4S)-2beta-Acetoxyvalparol-15-en-3-one	CC(=O)OC1CC2(C)CCC3C(CCC3(C)C2CC1C(=O)C)C(=C)C	C22H34O3	346.504	KNApSAcK
(4S)-Shinanolone (+)-(4S)-Shinanolone	Cc1cc(O)c2C(=O)CCC(O)c2c1	C11H12O3	192.211	KNApSAcK
(4S,5S,6S,4'S,5'S,6'S)-5,6,5',6'-Tetrahydro-beta,beta-carotene-4,4'-diol	CC1C(O)CCC(C)(C)C1\C=C\C(=C\C=C\C(=C\C=C\C=C(/C)\C=C\C=C(/C)\C=C\C2C(C)C(O)CCC2(C)C)\C)\C	C40H60O2	572.903	KNApSAcK
(4S,5S,7R,8R)-10(14),11(13)-Ratibidadien-12,8-olide	CC1CCCC12CC3C(CC2=C)OC(=O)C3=C	C15H20O2	232.318	KNApSAcK
(4S,5S,7R,8R)-9,11(13)-Ratibidadien-12,8-olide	CC1CCCC12CC3C(OC(=O)C3=C)C=C2C	C15H20O2	232.318	KNApSAcK
(4S,6S)-Dihydroxy-6-(14'Z-nonadecenyl)-2-cyclohexenone	CCCC\C=C/CCCCCCCCCCCCCC1(O)CC(O)C=CC1=O	C25H44O3	392.615	KNApSAcK
(4S-cis)-4-Hydroxy-2-methyl-5-(1-methylethyl)-2-cyclohexen-1-one	CC(C)C1CC(=O)C(=CC1O)C	C10H16O2	168.233	KNApSAcK
(5alpha,24R)-Ergostan-3-one	CC(C)C(C)CCC(C)C1CCC2(C)C3CCC4CC(=O)CCC4(C)C3CCC12C	C29H50O	414.707	KNApSAcK
(5alpha,25R)-Spirostan-3,6,12-trione	CC1CCC2(OC1)OC3CC4C5CC(=O)C6CC(=O)CCC6(C)C5CC(=O)C4(C)C3C2C	C27H38O5	442.588	KNApSAcK
(5alpha,8beta,10alpha)-9(12)-Capnellene-5,8,10-triol	CC1(C)CCC2(C)C(O)C3CC(O)C(=C)C3(O)C12	C15H24O3	252.349	KNApSAcK
(5R)-5-Hydroxylasiodiplodin (+)-(5R)-5-Hydroxylasiodiplodin	COc1cc(O)cc2CCCCCC(O)CC(C)OC(=O)c12	C17H24O5	308.369	KNApSAcK
(5R,5'R,6S,6'S)-5,6 5',6'-Diepoxy-5,5',6,6'-tetrahydro-beta,beta-carotene	C\C(=C/C=C/C=C(\C)/C=C/C=C(\C)/C=C/C12OC1(C)CC(O)CC2(C)C)\C=C\C=C(/C)\C=C\C34OC3(C)CCCC4(C)C	C40H56O3	584.871	KNApSAcK
(5R,6R)-1,3(8)-Ochtodiene-5,6-diol	CC1(C)C=C(CC(O)C1O)C=C	C10H16O2	168.233	KNApSAcK
(5S)-5-Methoxy-1,7-diphenyl-3-heptanone	COC(CCc1ccccc1)CC(=O)CCc2ccccc2	C20H24O2	296.403	KNApSAcK
(5S)-ent-Verticilla-3E,7E,12(18)-trien-5-ol	C\C\1=C/CC(O)\C(=C\CC2CCC(=C)C(CC1)C2(C)C)\C	C20H32O	288.467	KNApSAcK
(5Z)-Fusarin C	COC(=O)\C(=C\C)\C=C(/C)\C=C(\C)/C=C/C=C(\C)/C(=O)C12OC1C(O)(CCO)NC2=O	C23H29NO7	431.479	KNApSAcK
(6'''-O-(Delphinidin 3-O-(6''-O-p-coumaroyl-glucoside) 7-O-glucosyl)) (6''''-O-(	OCC1OC(OC2=C(Oc3cc(OC4OC(CO)C(O)C(O)C4O)cc(O)c3C2=O)c5ccc(OC6OC(COC(=O)CCC(=O)OCC7OC(Oc8cc(O)c9cc(OC%10OC(COC(=O)\C=C\c%11ccc(O)cc%11)C(O)C(O)C%10O)c([o+]c9c8)c%12cc(O)c(O)c(O)c%12)C(O)C(O)C7O)C(O)C(O)C6O)cc5)C(O)C(O)C1O	C73H79O42	1628.38	KNApSAcK
(6'''-O-(Delphinidin 3-O-(6''-O-p-coumaroyl-glucoside) 7-O-glucosyl)) (6''''-O-(	OCC1OC(OC2=C(Oc3cc(OC4OCC(O)C(O)C4O)cc(O)c3C2=O)c5ccc(OC6OC(COC(=O)CCC(=O)OCC7OC(Oc8cc(O)c9cc(OC%10OC(COC(=O)\C=C\c%11ccc(O)cc%11)C(O)C(O)C%10O)c([o+]c9c8)c%12cc(O)c(O)c(O)c%12)C(O)C(O)C7O)C(O)C(O)C6O)cc5)C(O)C(O)C1O	C72H77O41	1598.36	KNApSAcK
(6''-O-(Pelargonidin 3-O-[2''-O-(beta-D-xylopyranosyl)-beta-D-galactopyranosyl])	OCC1OC(Oc2ccc(\C=C\C(=O)OC(C(OC(=O)CC(=O)OCC3OC(Oc4cc5c(O)cc(O)cc5[o+]c4c6ccc(O)cc6)C(OC7OCC(O)C(O)C7O)C(O)C3O)C(=O)O)C(=O)O)cc2O)C(O)C(O)C1O	C48H51O30	1107.9	KNApSAcK
(6'R)-alpha-Echinenone	C\C(=C/C=C/C=C(\C)/C=C/C=C(\C)/C=C/C1=C(C)C(=O)CCC1(C)C)\C=C\C=C(/C)\C=C\C2C(=CCCC2(C)C)C	C40H54O	550.856	KNApSAcK
(6aR,11aR)-10-Hydroxy-3,9-dimethoxypterocarpan	COc1ccc2C3Oc4c(O)c(OC)ccc4C3COc2c1	C17H16O5	300.306	KNApSAcK
(6aR,11aR)-3,8-Dihydroxy-9-methoxypterocarpan	COc1cc2OC3C(COc4cc(O)ccc34)c2cc1O	C16H14O5	286.279	KNApSAcK
(6aR,11aR)-3,9,10-Trimethoxypterocarpan	COc1ccc2C3Oc4c(OC)c(OC)ccc4C3COc2c1	C18H18O5	314.333	KNApSAcK
(6aR,11aR)-8-Hydroxy-3,9-dimethoxypterocarpan	COc1ccc2C3Oc4cc(OC)c(O)cc4C3COc2c1	C17H16O5	300.306	KNApSAcK
(6aR,11aR)-Vesticarpan (+)-(6aR,11aR)-Vesticarpan	COc1ccc2C3COc4cc(O)ccc4C3Oc2c1O	C16H14O5	286.279	KNApSAcK
(6aR,11aS)-(3,4 8,9)-Bis(methylenedioxy)pterocarpan	C1Oc2cc3OC4C(COc5c6OCOc6ccc45)c3cc2O1	C17H12O6	312.274	KNApSAcK
(6E)-2alpha,9alpha-Epoxyeunicella-6,11(12)-dien-3beta-ol	CC(C)C1CCC(=C)C2C3C\C(=C/CCC(C)(OC(=O)C)C(O3)C12)\C	C22H34O3	346.504	KNApSAcK
(6R)-6,7-Dihydro-8-(2,4-dihydroxyphenyl)-6-(3,4-dihydroxyphenyl)-7-hydroxy-8H-py	OC1Cc2c(OC1c3ccc(O)c(O)c3)cc(O)c4C(C(O)C(Oc24)c5ccc(O)c(O)c5)c6ccc(O)cc6O	C30H26O11	562.521	KNApSAcK
(6R)-9,10-Dihydroxy-4,7-megastigmadien-3-one-9-O-beta-D-glucopyranoside	CC1=CC(=O)CC(C)(C)C1\C=C\C(CO)OC2OC(CO)C(O)C(O)C2O	C19H30O8	386.437	KNApSAcK
(6R,6aS,12aR)-6,9,11,11a-Tetrahydroxy-2,3-dimethoxyrotenone	COc1cc2OC(O)C3Oc4cc(O)cc(O)c4C(=O)C3(O)c2cc1OC	C18H16O9	376.314	KNApSAcK
(6R,7R,8R)-8-Methoxygoniodiol	COC(C(O)C1CC=CC(=O)O1)c2ccccc2	C14H16O4	248.274	KNApSAcK
(6R,9R)-3-Oxo-alpha-ionyl-9-O-beta-glucopyranoside (+)-(6R,9R)-3-Oxo-alpha-ionyl	CC(OC1OC(CO)C(O)C(O)C1O)\C=C\C2C(=CC(=O)CC2(C)C)C	C19H30O7	370.437	KNApSAcK
(6R,9R)-9-Hydroxy-4-megastigmen-3-one	CC(O)\C=C\C1C(=CC(=O)CC1(C)C)C	C13H20O2	208.297	KNApSAcK
(6R,9R)-Roseoside (-)-(6R,9R)-Roseoside	CC(OC1OC(CO)C(O)C(O)C1O)\C=C\C2(O)C(=CC(=O)CC2(C)C)C	C19H30O8	386.437	KNApSAcK
(6S)-5,18-Didehydro-5,6-dihydro-beta,beta-carotene (6'S)-beta,gamma-Carotene	C\C(=C/C=C/C=C(\C)/C=C/C=C(\C)/C=C/C1=C(C)CCCC1(C)C)\C=C\C=C(/C)\C=C\C2C(=C)CCCC2(C)C	C40H56	536.873	KNApSAcK
(6S)-Hydroxyzofimarin 6-Hydroxyzofimarin	COC1C(C)OC(OCC23CC4C(C)C(O)CC4C5(CC2C=C(C(C)C)C35C(=O)O)C=O)C(O)C1OC(=O)\C=C/C=C/C	C33H46O10	602.712	KNApSAcK
(6S,6'S)-epsilon,epsilon-Carotene-3,3'-dione	C\C(=C/C=C/C=C(\C)/C=C/C=C(\C)/C=C/C1C(=CC(=O)CC1(C)C)C)\C=C\C=C(/C)\C=C\C2C(=CC(=O)CC2(C)C)C	C40H52O2	564.84	KNApSAcK
(6S,6'S)-epsilon,epsilon-Carotene	C\C(=C/C=C/C=C(\C)/C=C/C=C(\C)/C=C/C1C(=CCCC1(C)C)C)\C=C\C=C(/C)\C=C\C2C(=CCCC2(C)C)C	C40H56	536.873	KNApSAcK
(6S,7E,9E,11E)-3-Oxo-13-apo-alpha-caroten-13-one (+)-(6S,7E,9E,11E)-3-Oxo-13-apo	CC(=O)\C=C\C=C(/C)\C=C\C1(O)C(=CC(=O)CC1(C)C)C	C18H24O3	288.381	KNApSAcK
(7R,8R)-Petranine	C\C=C(\C)/C(=O)OCC1=CC[N+]23CCC(OC2)C13	C14H20NO3	250.314	KNApSAcK
(7R,8S)-3'-O-methylcedrusin 9-p-coumarate (-)-(7R,8S)-3'-O-methylcedrusin 9-p-co	COc1cc(ccc1O)C2Oc3c(OC)cc(CCCO)cc3C2COC(=O)\C=C\c4ccc(O)cc4	C29H30O8	506.544	KNApSAcK
(7R,8S)-7'-Deoxo-2'-deoxy-2',3' 7,8-diepoxy-7',5'-(ethylideneoxy)verrucarin A 7b	CC1OC2CC3(C)OC3C(=O)OCC45C(OC6CC(OC(=O)\C=C\C=C\C1O2)C4(C)C67CO7)C=C(C)C8OC58	C29H34O10	542.574	KNApSAcK
(7S,8R)-Dehydrodiconiferyl alcohol 4-O-beta-glucopyranoside	COc1cc(ccc1OC2OC(CO)C(O)C(O)C2O)C3Oc4c(OC)cc(\C=C\CO)cc4C3CO	C26H32O11	520.526	KNApSAcK
(7S,8R)-Dehydrodiconiferyl alcohol 9-O-beta-glucopyranoside	COc1cc(ccc1O)C2Oc3c(OC)cc(CCCO)cc3C2COC4OC(CO)C(O)C(O)C4O	C26H34O11	522.542	KNApSAcK
(7Z)-Lobohedleolide (+)-(7Z)-Lobohedleolide	C\C\1=C/CC\C(=C/CC\C(=C\C2OC(=O)C(=C)C2CC1)\C)\C(=O)O	C20H26O4	330.418	KNApSAcK
(8'R)-Neochrome	C\C(=C/C=C/C=C(\C)/C=C/C=C(\C)/C1OC2(C)CC(O)CC(C)(C)C2=C1)\C=C\C=C(/C)\C=C=C3C(C)(C)CC(O)CC3(C)O	C40H56O4	600.87	KNApSAcK
(8alpha,11E,13R)-11,14-Labdadiene-8,13-diol	CC(O)(C=C)\C=C\C1C(C)(O)CCC2C(C)(C)CCCC12C	C20H34O2	306.483	KNApSAcK
(8alpha,13E)-8,15-Dihydroxy-13-labden-19-al	C\C(=C/CO)\CCC1C(C)(O)CCC2C(C)(CCCC12C)C=O	C20H34O3	322.482	KNApSAcK
(8alpha,13R)-8,13-Epoxy-2-hydroxy-1,14-labdadien-3-one	CC1(C)C2CCC3(C)OC(C)(CCC3C2(C)C=C(O)C1=O)C=C	C20H30O3	318.45	KNApSAcK
(8alpha,13S)-8,13 13,17-Diepoxy-14,15-dinorlabdane	CC1(C)CCCC2(C)C1CCC34COC(C)(CCC23)O4	C18H30O2	278.43	KNApSAcK
(8alphaH,9alpha,12E)-12,14-Labdadiene-9,18-diol	CC1CCC2C(C)(CO)CCCC2(C)C1(O)C\C=C(/C)\C=C	C20H34O2	306.483	KNApSAcK
(8R)-8-Bromo-10-epi-beta-Snyderol	CC(O)(CCC1C(=C)C(Br)CC(Br)C1(C)C)C=C	C15H24Br2O	380.158	KNApSAcK
(8R,8'R,9R)-4,4',9-trihydroxy-3,3'-dimethoxy-9,9'-epoxylignan	COc1cc(CC2COC(O)C2Cc3ccc(O)c(OC)c3)ccc1O	C20H24O6	360.401	KNApSAcK
(8S,8'S)-(+)-8-Hydroxy-oxomatairesinol	COc1cc(CC2(O)C(COC2=O)C(=O)c3ccc(O)c(OC)c3)ccc1O	C20H20O8	388.368	KNApSAcK
(9R,10R)-9,10,11,5'-Tetrahydroxyumbelliprenin	C\C(=C/COc1cc(O)c2C=CC(=O)Oc2c1)\CC\C=C(/C)\CC(O)C(O)C(C)(C)O	C24H32O7	432.507	KNApSAcK
(9R,10S)-rel-(-)-9,10-bis(Acetyloxy)-9,10-dihydro-5-methoxy-8,8-dimethyl-2-pheny	COc1cc2OC(C)(C)C(OC(=O)C)C(OC(=O)C)c2c3OC(=CC(=O)c13)c4ccccc4	C25H24O8	452.453	KNApSAcK
(9S,10R)-9,10,11-Trihydroxyumbelliprenin	C\C(=C/COc1ccc2C=CC(=O)Oc2c1)\CC\C=C(/C)\CC(O)C(O)C(C)(C)O	C24H32O6	416.507	KNApSAcK
(9S,10R)-9,10,5'-Triacetoxy-11-hydroxyumbelliprenin	CC(=O)OC(C\C(=C\CC\C(=C\COc1cc(OC(=O)C)c2C=CC(=O)Oc2c1)\C)\C)C(OC(=O)C)C(C)(C)O	C30H38O10	558.617	KNApSAcK
(9Z)-Violaxanthin	C\C(=C/C=C/C=C(\C)/C=C/C=C(\C)/C=C/C12OC1(C)CC(O)CC2(C)C)\C=C\C=C(\C)/C=C/C34OC3(C)CC(O)CC4(C)C	C40H56O4	600.87	KNApSAcK
(9Z,12Z)-6-formyl-2,3,3a,4,5,8,9,11a-octahydro-10-(hydroxymethyl)-3-methylene-4-	CCCCC\C=C\C\C=C/CCCCCCCC(=O)OC1C(OC(=O)C(C)CC)C2C(OC(=O)C2=C)\C=C(/CO)\CC\C=C\1/C=O	C38H56O8	640.846	KNApSAcK
(all-E,3R,3'R)-Zeaxanthin alpha-L-rhamnopyranoside	CC1OC(OC2CC(=C(\C=C\C(=C\C=C\C(=C\C=C\C=C(/C)\C=C\C=C(/C)\C=C\C3=C(C)CC(O)CC3(C)C)\C)\C)C(C)(C)C2)C)C(O)C(O)C1O	C46H66O6	715.013	KNApSAcK
(aR)-2'-Methoxyvinaxanthone	COC1=C(C(=O)c2c(O1)cc(O)c(O)c2C(=O)O)c3c(cc4C(=O)c5c(Oc4c3C(=O)C)cc(O)c(O)c5C(=O)O)C(=O)C	C29H18O15	606.444	KNApSAcK
(Cyanidin 3-O-(3-O-acetyl-beta-glucoside) (kaempferol 3-O-(2-O-beta-glucosyl-bet	CC(=O)OC1C(O)C(COC(=O)CC(=O)OC2C(O)C(O)C(OC2Oc3cc(O)c4C(=O)C(=C(Oc4c3)c5ccc(O)cc5)OC6OC(CO)C(O)C(O)C6OC7OC(CO)C(O)C(O)C7O)C(=O)O)OC(Oc8cc9c(O)cc(O)cc9[o+]c8c%10ccc(O)c(O)c%10)C1O	C59H61O36	1346.09	KNApSAcK
(Cyanidin 3-O-beta-glucoside)(kaempferol 3-O-(2-O-beta-glucosyl-beta-glucoside)-	OCC1OC(OC2C(O)C(O)C(CO)OC2OC3=C(Oc4cc(OC5OC(C(O)C(O)C5OC(=O)CC(=O)OCC6OC(Oc7cc8c(O)cc(O)cc8[o+]c7c9ccc(O)c(O)c9)C(O)C(O)C6O)C(=O)O)cc(O)c4C3=O)c%10ccc(O)cc%10)C(O)C(O)C1O	C57H59O35	1304.06	KNApSAcK
(Delphinidin 3-gentiobios-6'''-yl)(apigenin 7-glucos-6''-yl)malonate	OC1C(O)C(COC(=O)CC(=O)OCC2OC(Oc3cc(O)c4C(=O)C=C(Oc4c3)c5ccc(O)cc5)C(O)C(O)C2O)OC(OCC6OC(Oc7cc8c(O)cc(O)cc8[o+]c7c9cc(O)c(O)c(O)c9)C(O)C(O)C6O)C1O	C51H51O29	1127.93	KNApSAcK
(E)-(+)-2-(1-hydroxy-3,7-dimethyl-2,6-octadienyl)-1-methyl-4(1H)-1uinolinone CJ	CN1C(=CC(=O)c2ccccc12)C(O)\C=C(/C)\CCC=C(C)C	C20H25NO2	311.418	KNApSAcK
(E)-(+)-2-[2-(2,2-Dimethyl-6-methylenecyclohexyl)ethyl]-2-butenedial	CC1(C)CCCC(=C)C1CC\C(=C/C=O)\C=O	C15H22O2	234.334	KNApSAcK
(E)-(-)-2-(3-Hydroxy-3,7-dimethyl-1,6-octadienyl)-1-methyl-4(1H)-quinolinone CJ	CN1C(=CC(=O)c2ccccc12)\C=C\C(C)(O)CCC=C(C)C	C20H25NO2	311.418	KNApSAcK
(E)-(-)-2-[5-(3,3-Dimethyloxiranyl)-3-methyl-2-pentenyl]-1,3-dimethyl-4(1H)-quin	CN1C(=C(C)C(=O)c2ccccc12)C\C=C(/C)\CCC3OC3(C)C	C21H27NO2	325.445	KNApSAcK
(E)-(4-Acetoxycinnamoyl)-epilupinine	CC(=O)Oc1ccc(\C=C\C(=O)OCC2CCCN3CCCCC23)cc1	C21H27NO4	357.443	KNApSAcK
(E)-(4-alpha-L-Rhamnosyloxycinnamoyl)epilupinine	CC1OC(Oc2ccc(\C=C\C(=O)OCC3CCCN4CCCCC34)cc2)C(O)C(O)C1O	C25H35NO7	461.548	KNApSAcK
(E)-(4-Hydroxy-3-methoxycinnamoyl)epilupinine	COc1cc(\C=C\C(=O)OCC2CCCN3CCCCC23)ccc1O	C20H27NO4	345.433	KNApSAcK
(E)-1-[3-(Chloromethylene)-2,3-dihydro-1-benzoxepin-7-yl]-ethanone Pterulone Pte	CC(=O)c1ccc2OC\C(=C\Cl)\C=Cc2c1	C13H11ClO2	234.678	KNApSAcK
(E)-2'-Methoxy-6'',6''-dimethylchromeno-[2'',3'' 4',3']-9-methoxychalcone	CO\C(=C/C(=O)c1ccccc1)\c2ccc3OC(C)(C)C=Cc3c2OC	C22H22O4	350.408	KNApSAcK
(E)-2,4-Ochtodiene-1,6-diol	CC1(C)C\C(=C/CO)\C=CC1O	C10H16O2	168.233	KNApSAcK
(E)-2-(1,5-Dimethyl-1,4-hexadienyl)-5-methyl-1,4-benzenediol	CC(=CC\C=C(/C)\c1cc(O)c(C)cc1O)C	C15H20O2	232.318	KNApSAcK
(E)-2-(1,5-Dimethyl-1,4-hexadienyl)-5-methyl-phenol acetate	CC(=CC\C=C(/C)\c1ccc(C)cc1OC(=O)C)C	C17H22O2	258.355	KNApSAcK
(E)-2-(3,7-Dimethyl-2,6-octadienyl)-1,3-dimethyl-4(1H)-quinolinone CJ 13217	CN1C(=C(C)C(=O)c2ccccc12)C\C=C(/C)\CCC=C(C)C	C21H27NO	309.445	KNApSAcK
(E)-2-(3,7-Dimethyl-2,6-octadienyl)-1-methyl-4(1H)-quinolinone CJ 13566	CN1C(=CC(=O)c2ccccc12)C\C=C(/C)\CCC=C(C)C	C20H25NO	295.419	KNApSAcK
(E)-2-(3,7-Dimethyl-2,6-octadienyl)-3-methyl-1-[(methylthio)methyl]-4(1H)-quinol	CSCN1C(=C(C)C(=O)c2ccccc12)C\C=C(/C)\CCC=C(C)C	C22H29NOS	355.537	KNApSAcK
(E)-2-(3,7-Dimethyl-2,6-octadienyl)-3-methyl-4(1H)-quinolinone CJ 13136 (E)-2-(3	CC(=CCC\C(=C\CC1=C(C)C(=O)c2ccccc2N1)\C)C	C20H25NO	295.419	KNApSAcK
(E)-2-(3,7-Dimethyl-2,6-octadienyl)-4(1H)-quinolinone CJ 13565	CC(=CCC\C(=C\CC1=CC(=O)c2ccccc2N1)\C)C	C19H23NO	281.392	KNApSAcK
(E)-2-(3-hydroxy-3-methyl-1-butenyl)-1,4-benzenediol F 11334B1	CC(C)(O)\C=C\c1cc(O)ccc1O	C11H14O3	194.227	KNApSAcK
(E)-2-(3-methoxy-3-methyl-1-butenyl)-1,4-benzenediol F 11334B2	COC(C)(C)\C=C\c1cc(O)ccc1O	C12H16O3	208.254	KNApSAcK
(E)-2-Methyl-4-methoxy-5-methyl-2-[2-[(2-methyl-1-oxopropoxy)methyl]oxiranyl]phe	COc1cc(c(OC(=O)\C(=C\C)\C)cc1C)C2(COC(=O)C(C)C)CO2	C20H26O6	362.417	KNApSAcK
(E)-2-Methyl-[2-[5-methoxy-4-methyl-2-(2-methyl-1-oxopropoxy)phenyl]oxiranyl]met	COc1cc(c(OC(=O)C(C)C)cc1C)C2(COC(=O)\C(=C\C)\C)CO2	C20H26O6	362.417	KNApSAcK
(E)-24-Propylidenecholesterol	CC\C=C(/CCC(C)C1CCC2C3CC=C4CC(O)CCC4(C)C3CCC12C)\C(C)C	C30H50O	426.717	KNApSAcK
(E)-3,4'-Dimethoxystilbene (E)-1-Methoxy-3-[2-(4-methoxyphenyl)ethenyl]-benzene	COc1ccc(\C=C\c2cccc(OC)c2)cc1	C16H16O2	240.297	KNApSAcK
(E)-3,4-Methylenedioxy-2'-methoxy-6'',6''-dimethylchromeno-[2'',3'' 4',3']-9-met	CO\C(=C/C(=O)c1ccc2OCOc2c1)\c3ccc4OC(C)(C)C=Cc4c3OC	C23H22O6	394.417	KNApSAcK
(E)-3-(1,3-Benzodioxol-5-yl)-7-[(3,7-dimethyl-2,6-octadienyl)oxy]-4H-1-benzopyra	CC(=CCC\C(=C\COc1ccc2C(=O)C(=COc2c1)c3ccc4OCOc4c3)\C)C	C26H26O5	418.482	KNApSAcK
(E)-3-[4-[(3-Methyl-2-butenyl)oxy]phenyl]-2-propenoic acid methyl ester	COC(=O)\C=C\c1ccc(OCC=C(C)C)cc1	C15H18O3	246.302	KNApSAcK
(E)-4-(3,4-dimethoxyphenyl)but-3-en-1-ol (E)-4-(3,4-Dimethoxyphenyl)-3-buten-1-o	COc1ccc(\C=C\CCO)cc1OC	C12H16O3	208.254	KNApSAcK
(E)-4-(3,4-dimethoxyphenyl)but-3-en-1-yl acetate (E)-4-(3,4-dimethoxyphenyl)--3-	COc1ccc(\C=C\CCOC(=O)C)cc1OC	C14H18O4	250.29	KNApSAcK
(E)-5-(1,5-Dimethyl-3-oxo-1-hexenyl)-2-methyl-2-cyclohexen-1-one	CC(C)CC(=O)\C=C(/C)\C1CC=C(C)C(=O)C1	C15H22O2	234.334	KNApSAcK
(E)-6-Hydroxy-7-(3-methyl-2-butenyl)-2-(3-oxobut-1-enyl)chroman-5-carbaldehyde	CC(=CCc1cc2OC(CCc2c(C=O)c1O)\C=C\C(=O)C)C	C19H22O4	314.376	KNApSAcK
(E)-6-Methyl-2-(4-methyl-3-cyclohexen-1-yl)-2-hepten-4-one	CC(C)CC(=O)\C=C(/C)\C1CCC(=CC1)C	C15H24O	220.35	KNApSAcK
(E)-7-(6-Hydroperoxy-3,7-dimethylocta-2,7-dienyloxy)coumarin	C\C(=C/COc1ccc2C=CC(=O)Oc2c1)\CCC(OO)C(=C)C	C19H22O5	330.375	KNApSAcK
(E)-7-(chloromethylene)-7,8-dihydro-furo[3,2-h][1]benzoxepin-2-acetic acid Pteru	OC(=O)Cc1oc2cc3OC\C(=C\Cl)\C=Cc3cc2c1	C15H11ClO4	290.698	KNApSAcK
(E)-8-(6-Hydroperoxy-3,7-dimethylocta-2,7-dienyloxy)psoralen	C\C(=C/COc1c2OC(=O)C=Cc2cc3ccoc13)\CCC(OO)C(=C)C	C21H22O6	370.396	KNApSAcK
(E)-9,15-Dibromo-1,3(15)-chamigradien-7-ol	CC1(C)CC(Br)CC(C)(O)C12CC\C(=C/Br)\C=C2	C15H22Br2O	378.143	KNApSAcK
(E)-Aldosecologanin	COC(=O)C1=COC(OC2OC(CO)C(O)C(O)C2O)C(C=C)C1C\C=C(\C=O)/C3C(C=C)C(OC4OC(CO)C(O)C(O)C4O)OC=C3C(=O)OC	C34H46O19	758.718	KNApSAcK
(E)-alpha-Bisabolene	CC(=CC\C=C(/C)\C1CCC(=CC1)C)C	C15H24	204.351	KNApSAcK
(E)-alpha-Santalal	C\C(=C/CCC1(C)C2CC3C(C2)C13C)\C=O	C15H22O	218.335	KNApSAcK
(E)-beta-Bourbonene beta-Bourbonene	CC(C)C1CCC2(C)C3CCC(=C)C3C12	C15H24	204.351	KNApSAcK
(E)-beta-Santalal	C\C(=C/CCC1(C)C2CCC(C2)C1=C)\C=O	C15H22O	218.335	KNApSAcK
(E)-Betulin-3-p-coumarate 3-O-(E)-p-Coumaroylbetulin 3-(E)-p-Coumaroylbetulin	CC(=C)C1CCC2(CO)CCC3(C)C(CCC4C5(C)CCC(OC(=O)\C=C\c6ccc(O)cc6)C(C)(C)C5CCC34C)C12	C39H56O4	588.86	KNApSAcK
(E)-Buxenone	CNC1CCC23CC24CCC5(C)\C(=C/C)\C(=O)CC5(C)C4CCC3C1(C)C	C25H39NO	369.583	KNApSAcK
(E)-Cinnamaldehyde	O=C\C=C\c1ccccc1	C9H8O	132.159	KNApSAcK
(E)-Cinnamic alcohol trans-Cinnamyl alcohol	OC\C=C\c1ccccc1	C9H10O	134.175	KNApSAcK
(E)-Debromohymenialdisine	NC1=NC(=O)\C(=C/2\CCNC(=O)c3[nH]ccc23)\N1	C11H11N5O2	245.237	KNApSAcK
(E)-ent-2alpha-17-Dihydroxy-7,13-labdienepentenoic acid	C\C(=C/C(=O)O)\CCC1C(=CCC2C(C)(C)CC(O)CC12C)CO	C20H32O4	336.466	KNApSAcK
(E)-ent-3beta-3,18-Dihydroxy-8(17),13-labdadien-15-oic acid	C\C(=C/CO)\C(O)CC1C(=C)CCC2C1(C)CCCC2(C)C(=O)O	C20H32O4	336.466	KNApSAcK
(E)-ent-3beta-Hydroxy-2-oxo-7,13-labdadien-15-al	C\C(=C/C=O)\CCC1C(=CCC2C(C)(C)C(O)C(=O)CC12C)C	C20H30O3	318.45	KNApSAcK
(E)-Ferulic acid E-Ferulic acid trans-Ferulic acid 4-Hydroxy-3-methoxy-(E)-cinna	COc1cc(\C=C\C(=O)O)ccc1O	C10H10O4	194.184	KNApSAcK
(E)-Labda-8(17),12-diene-15,16-dial Labda-8beta(17),12E-diene-15,16-dial	CC1(C)CCCC2(C)C(C\C=C(/CC=O)\C=O)C(=C)CCC12	C20H30O2	302.451	KNApSAcK
(E)-Methyl 4-methoxycinnamate 4-Methoxy-trans-cinnamic acid	COC(=O)\C=C\c1ccc(OC)cc1	C11H12O3	192.211	KNApSAcK
(E)-Methyl-4-hydroxy-3-methoxycinnamate Methyl (E)-ferulate Methyl trans-ferulat	COC(=O)\C=C\c1ccc(O)c(OC)c1	C11H12O4	208.211	KNApSAcK
(E)-Methyl-4-hydroxycinnamate	COC(=O)\C=C\c1ccc(O)cc1	C10H10O3	178.185	KNApSAcK
(E)-O-Methylsuberenol	COc1cc2OC(=O)C=Cc2cc1\C=C\C(C)(C)OC	C16H18O4	274.312	KNApSAcK
(E)-omega-Acetoxyferprenin	CC(=O)OC\C(=C\CC\C(=C\CCC1(C)OC2=C(C=C1)C(=O)Oc3ccccc23)\C)\C	C26H30O5	422.513	KNApSAcK
(E)-omega-Acetoxyferulenol	CC(=O)OC\C(=C\CC\C(=C\CC\C(=C\CC1=C(O)c2ccccc2OC1=O)\C)\C)\C	C26H32O5	424.529	KNApSAcK
(E)-omega-Hydroxyferprenin	C\C(=C/CC\C(=C\CCC1(C)OC2=C(C=C1)C(=O)Oc3ccccc23)\C)\CO	C24H28O4	380.477	KNApSAcK
(E)-omega-Hydroxyferulenol	C\C(=C/CC\C(=C\CC\C(=C\CC1=C(O)c2ccccc2OC1=O)\C)\C)\CO	C24H30O4	382.493	KNApSAcK
(E)-omega-Oxoferprenin	C\C(=C/CCC1(C)OC2=C(C=C1)C(=O)Oc3ccccc23)\CC\C=C(/C)\C=O	C24H26O4	378.461	KNApSAcK
(E)-omega-Oxoferulenol	C\C(=C/CC\C(=C\CC1=C(O)c2ccccc2OC1=O)\C)\CC\C=C(/C)\C=O	C24H28O4	380.477	KNApSAcK
(E)-Sinapic acid trans-Sinapic acid 4-Hydroxy-3,5-dimethoxy-(E)-cinnamic acid	COc1cc(\C=C\C(=O)O)cc(OC)c1O	C11H12O5	224.21	KNApSAcK
(E,E)-(-)-2-[2-(2,2-Dimethyl-6-methylenecyclohexyl)ethyl]-1,3-butadiene-1,4-diol	CC(=O)O\C=C\C(=C\OC(=O)C)\CCC1C(=C)CCCC1(C)C	C19H28O4	320.423	KNApSAcK
(E,E)-2-Methyl-4-methoxy-5-methyl-2-[2-[[(2-methyl-1-oxo-2-butenyl)oxy]methyl]ox	COc1cc(c(OC(=O)\C(=C\C)\C)cc1C)C2(COC(=O)\C(=C\C)\C)CO2	C21H26O6	374.428	KNApSAcK
(E,E)-2-[2-(2,6,6-Trimethyl-2-cyclohexen-1-yl)ethyl]-1,3-butadiene-1,4-diol diac	CC(=O)O\C=C\C(=C\OC(=O)C)\CCC1C(=CCCC1(C)C)C	C19H28O4	320.423	KNApSAcK
(E,E)-6-Methyl-10-(tetrahydro-5,5-dimethyl-2-furanyl)-5,9-undecadien-2-one	CC(=O)CC\C=C(/C)\CC\C=C(/C)\C1CCC(C)(C)O1	C18H30O2	278.43	KNApSAcK
(E,E)-8-(7-Hydroxy-3,7-dimethylocta-2,5-dienyloxy) psoralen	C\C(=C/COc1c2OC(=O)C=Cc2cc3ccoc13)\C\C=C\C(C)(C)O	C21H22O5	354.396	KNApSAcK
(E,E)-Terrestribisamide Terrestribisamide	COc1cc(\C=C\C(=O)NCCCCNC(=O)\C=C\c2ccc(O)c(OC)c2)ccc1O	C24H28N2O6	440.489	KNApSAcK
(endo,anti)-2-Hydroxy-1,7-dimethyl-bicyclo[2.2.1]heptane-7-methanol	CC1(CO)C2CCC1(C)C(O)C2	C10H18O2	170.249	KNApSAcK
(ent)-6-beta-Hydroxycopalic acid	C\C(=C/C(=O)O)\CCC1C(=C)CC(O)C2C(C)(C)CCCC12C	C20H32O3	320.466	KNApSAcK
(ent)-8-alpha-Hydroxy-13(16),14-labdadien-19-oic acid	CC1(O)CCC2C(C)(CCCC2(C)C(=O)O)C1CCC(=C)C=C	C20H32O3	320.466	KNApSAcK
(ent-13E,14E)-15,16-Diacetoxy-7,13(16),14-labdatriene	CC(=O)O\C=C\C(=C\OC(=O)C)\CCC1C(=CCC2C(C)(C)CCCC12C)C	C24H36O4	388.54	KNApSAcK
(ent-13R)-13,18-Dihydroxy-8,14-labdadien-7-one	CC1=C(CCC(C)(O)C=C)C2(C)CCCC(C)(CO)C2CC1=O	C20H32O3	320.466	KNApSAcK
(ent-13S)-15,16-Dihydroxy-8(17)-labden-18-oic acid	CC12CCCC(C)(C1CCC(=C)C2CCC(CO)CCO)C(=O)O	C20H34O4	338.482	KNApSAcK
(ent-2alpha,3beta,13Z)-3-Angeloyloxy-8(17),13-labdadiene-2,15,16,18-tetrol	C\C=C(\C)/C(=O)OC1C(O)CC2(C)C(CC\C(=C\CO)\CO)C(=C)CCC2C1(C)CO	C25H40O6	436.581	KNApSAcK
(ent-3beta,8beta,13Z)-3,8-Dihydroxy-17-oxo-13-labden-15-oic acid	C\C(=C\C(=O)O)\CCC1C2(C)CCC(O)C(C)(C)C2CCC1(O)C=O	C20H32O5	352.465	KNApSAcK
(ent-6alpha,13E)-6,16-Dihydroxy-17-oxo-7,13-labdadien-15-oic acid	CC1(C)CCCC2(C)C(CC\C(=C/C(=O)O)\CO)C(=CC(O)C12)C=O	C20H30O5	350.449	KNApSAcK
(ent-6alpha,8alpha,13E)-6,8-Dihydroxy-13-labden-15-oic acid	C\C(=C/C(=O)O)\CCC1C(C)(O)CC(O)C2C(C)(C)CCCC12C	C20H34O4	338.482	KNApSAcK
(ent-7alpha,8beta,12E)-12,14-Labdadiene-7,8-diol	C\C(=C/CC1C(C)(O)C(O)CC2C(C)(C)CCCC12C)\C=C	C20H34O2	306.483	KNApSAcK
(I-2S,II-2S)-I-7,II-7-Di-O-methyltetrahydroamentoflavone	COc1cc(O)c2C(=O)CC(Oc2c1)c3ccc(O)c(c3)c4c(OC)cc(O)c5C(=O)CC(Oc45)c6ccc(O)cc6	C32H26O10	570.543	KNApSAcK
(methylthio-methyl)sulfone	CSCS(=O)(=O)c1ccccc1	C8H10O2S2	202.294	KNApSAcK
(N-Sulfoindol-3-yl)methylglucosinolate	OCC1OC(S\C(=N\OS(=O)(=O)O)\Cc2cn(c3ccccc23)S(=O)(=O)O)C(O)C(O)C1O	C16H20N2O12S3	528.531	KNApSAcK
(R)-(+)-7-Hydroxy-8-(2-hydroxy-3-methyl-3-butenyl)-2H-1-benzopyran-2-one	CC(=C)CC(O)c1c(O)ccc2C=CC(=O)Oc12	C14H14O4	246.259	KNApSAcK
(R)-(+)-Carnegine	COc1cc2CCN(C)C(C)c2cc1OC	C13H19NO2	221.295	KNApSAcK
(R)-(+)-Ligulaodonin A Ligulaodonin A	COc1cc2OC(C)(CC(=O)c2cc1OC)c3oc4cc(OC)c(OC)cc4c3	C22H22O7	398.406	KNApSAcK
(R)-(+)-Millinol	CC(C)(C=C)c1cc2CC(COc2cc1O)c3ccc(O)cc3O	C20H22O4	326.386	KNApSAcK
(R)-(+)-p-Menth-1-en-8-ol (R)-(+)-alpha-Terpineol	CC1=CCC(CC1)C(C)(C)O	C10H18O	154.249	KNApSAcK
(R)-(+)-Perillaldehyde Perilla aldehyde	CC(=C)C1CCC(=CC1)C=O	C10H14O	150.218	KNApSAcK
(R)-(+)-Perillyl alcohol (R)-(+)-Perilla alcohol	CC(=C)C1CCC(=CC1)CO	C10H16O	152.233	KNApSAcK
(R)-(+)-Verbenone Verbenone	CC1=CC(=O)C2CC1C2(C)C	C10H14O	150.218	KNApSAcK
(R)-(-)-alpha-Curcumene AR-Curcumene	CC(CCC=C(C)C)c1ccc(C)cc1	C15H22	202.335	KNApSAcK
(R)-(-)-Carvone	CC(=C)C1CC=C(C)C(=O)C1	C10H14O	150.218	KNApSAcK
(R)-(-)-Cryptone	CC(C)C1CCC(=O)C=C1	C9H14O	138.207	KNApSAcK
(R)-(-)-Mellein Mellein Ochracin	CC1Cc2cccc(O)c2C(=O)O1	C10H10O3	178.185	KNApSAcK
(R)-(-)-Neocarazostatin B Neocarazostatin B	COc1c(C)c(CC(C)O)c2[nH]c3ccc(CC=C(C)C)cc3c2c1O	C22H27NO3	353.455	KNApSAcK
(R)-(-)-Noroxopenlanfuran Noroxopenlanfuran	CC(C)C1CCC(=O)C=C1Cc2cocc2	C14H18O2	218.292	KNApSAcK
(R)-(-)-p-Menth-1-en-4-ol (-)-Terpinene-4-ol Terpinene-4-ol	CC(C)C1(O)CCC(=CC1)C	C10H18O	154.249	KNApSAcK
(R)-(-)-Xanthorrhizol (R)-5-(1,5-Dimethyl-4-hexenyl)-o-cresol Xanthorrhizol	CC(CCC=C(C)C)c1ccc(C)c(O)c1	C15H22O	218.335	KNApSAcK
(R)-1,2,3,4,4a,5,6,7-octahydro-4a,8-dimethyl-2-(1-methylethylidene)naphthalene (	CC(=C1CCC2(C)CCCC(=C2C1)C)C	C15H24	204.351	KNApSAcK
(R)-1-Methyl-4-(1,2,2-trimethylcyclopentyl)-benzene (+)-Cuparene (R)-Cuparene Cu	Cc1ccc(cc1)C2(C)CCCC2(C)C	C15H22	202.335	KNApSAcK
(R)-1-Methyl-4-(1-methyl-5-hexenyl)-benzene	CC(CCCC=C)c1ccc(C)cc1	C14H20	188.309	KNApSAcK
(R)-2,4,5-Trimethoxydalbergiquinol	COc1cc(OC)c(cc1OC)C(C=C)c2ccccc2	C18H20O3	284.35	KNApSAcK
(R)-2,5-Dihydroxy-3,4-dimethoxydalbergiquinol (R)-3,4Dimethoxydalbergionequinol	COc1c(O)cc(C(C=C)c2ccccc2)c(O)c1OC	C17H18O4	286.322	KNApSAcK
(R)-2-(1,5-dimethyl-4-hexenyl)-4-hydroxy-5-methyl-3,6-dioxo-1,4-cyclohexadien-1-	CC(C)CC(=O)OC1=C(C(C)CCC=C(C)C)C(=O)C(=C(C)C1=O)O	C20H28O5	348.433	KNApSAcK
(R)-3,4,6,7,8,8a-Hexahydro-5,8a-dimethyl-3-(1-methylethylidene)-2(1H)-nphthaleno	CC(=C1CC2=C(C)CCCC2(C)CC1=O)C	C15H22O	218.335	KNApSAcK
(R)-3,4-Dihydroxybutanoic acid gamma-lactone (+)-(R)-3-Hydroxy-.gamma.-butyrolac	OC1COC(=O)C1	C4H6O3	102.089	KNApSAcK
(R)-3,4-Dimethoxydalbergione	COC1=C(OC)C(=O)C(=CC1=O)C(C=C)c2ccccc2	C17H16O4	284.307	KNApSAcK
(R)-4'-Hydroxy-3,4-dimethoxydalbergione	COC1=C(OC)C(=O)C(=CC1=O)C(C=C)c2ccc(O)cc2	C17H16O5	300.306	KNApSAcK
(R)-4-Bromo-2-methyl-5-(1,2,2-trimethyl-3-cyclopenten-1-yl)phenol acetate Cupala	CC(=O)Oc1cc(c(Br)cc1C)C2(C)CC=CC2(C)C	C17H21BrO2	337.251	KNApSAcK
(R)-4-Ethenyltetrahydro-4-hydroxy-2H-pyran-2-one (-)-Harzialactone B Harzialacto	OC1(CCOC(=O)C1)C=C	C7H10O3	142.153	KNApSAcK
(R)-4-Methoxydalbergione	COC1=CC(=O)C(=CC1=O)C(C=C)c2ccccc2	C16H14O3	254.281	KNApSAcK
(R)-5,7-Dihydroxy-2',4',5'-trimethoxyisoflavanone	COc1cc(OC)c(cc1OC)C2COc3cc(O)cc(O)c3C2=O	C18H18O7	346.331	KNApSAcK
(R)-5-(1,5-dimethyl-4-hexenyl)-4-hydroxy-2-methyl-3,6-dioxo-1,4-cyclohexadien-1-	CC(C)CC(=O)OC1=C(C)C(=O)C(=C(C(C)CCC=C(C)C)C1=O)O	C20H28O5	348.433	KNApSAcK
(R)-5-Hydroxy-2,4-dimethoxydalbergiquinol	COc1cc(OC)c(cc1O)C(C=C)c2ccccc2	C17H18O3	270.323	KNApSAcK
(R)-6-O-(4-Geranyloxy-2-hydroxy)-cinnamoylmarmin	CC(=CCC\C(=C\COc1ccc(\C=C\C(=O)OC(CC\C(=C\COc2ccc3C=CC(=O)Oc3c2)\C)C(C)(C)O)c(O)c1)\C)C	C38H46O8	630.767	KNApSAcK
(R)-7,8-dihydroxy-alpha-dunnione (-)-(R)-7,8-dihydroxy-alpha-dunnione	CC1OC2=C(C(=O)c3ccc(O)c(O)c3C2=O)C1(C)C	C15H14O5	274.269	KNApSAcK
(R)-7-Hydroxy-2',3',4'-trimethoxyisoflavan	COc1ccc(C2COc3cc(O)ccc3C2)c(OC)c1OC	C18H20O5	316.348	KNApSAcK
(R)-7-Hydroxy-alpha-dunnione (-)-(R)-7-Hydroxy-alpha-dunnione	CC1OC2=C(C(=O)c3ccc(O)cc3C2=O)C1(C)C	C15H14O4	258.269	KNApSAcK
(R)-7-Methoxy-6,8-dihydroxy-alpha-dunnione	COc1c(O)cc2C(=O)C3=C(OC(C)C3(C)C)C(=O)c2c1O	C16H16O6	304.295	KNApSAcK
(R)-8-Hydroxy-alpha-dunnione	CC1OC2=C(C(=O)c3cccc(O)c3C2=O)C1(C)C	C15H14O4	258.269	KNApSAcK
(R)-Glucoisatisin Glucoisatisin	OCC1OC(S\C(=N\OS(=O)(=O)O)\CC(OC(=O)CC2C(=O)Nc3ccccc23)C=C)C(O)C(O)C1O	C21H26N2O12S2	562.567	KNApSAcK
(R)-Isomillinol B (3R)-7,2'-Dihydroxy-4'-methoxy-6-(1,1-dimethyl-2-propenyl)isof	COc1ccc(C2COc3cc(O)c(cc3C2)C(C)(C)C=C)c(O)c1	C21H24O4	340.413	KNApSAcK
(R)-Linden ether 3,9-Epoxy-p-mentha-1,4(8)-diene	CC1=CC2OCC(=C2CC1)C	C10H14O	150.218	KNApSAcK
(R)-N-Nicotinoyl-2-hydroxy-2-phenylethylamine (-)-N-Benzoyl-2-hydroxy-2-phenylet	OC(CNC(=O)c1ccccc1)c2ccccc2	C15H15NO2	241.285	KNApSAcK
(R)-o-Mentha-1(7),5,8-triene	CC(=C)C1CCC=CC1=C	C10H14	134.218	KNApSAcK
(R)-Peucedanol 7-O-beta-D-glucopyranoside	CC(C)(O)C(O)Cc1cc2C=CC(=O)Oc2cc1OC3OC(CO)C(O)C(O)C3O	C20H26O10	426.414	KNApSAcK
(R)-Saclenone (R)-5-Hydroxy-2',4',5'-trimethoxy-2'',2''-dimethylpyrano[5'',6'' 6	COc1cc(OC)c(cc1OC)C2COc3cc4OC(C)(C)C=Cc4c(O)c3C2=O	C23H24O7	412.432	KNApSAcK
(R)-Semixanthomegnin (-)-Semixanthomegnin	COC1=CC(=O)c2c(O)c3C(=O)OC(C)Cc3cc2C1=O	C15H12O6	288.252	KNApSAcK
(R)-Trichostatin A TSA Trichostatin A	CC(\C=C(/C)\C=C\C(=O)NO)C(=O)c1ccc(cc1)N(C)C	C17H22N2O3	302.368	KNApSAcK
(R,R)-4-(1-Hydroxy-1,5-dimethyl-4-hexenyl)-1-cyclohexene-1-carboxylic acid methy	COC(=O)C1=CCC(CC1)C(C)(O)CCC=C(C)C	C16H26O3	266.376	KNApSAcK
(R,R)-[4-(1-hydroxy-1,5-dimethyl-4-hexenyl)-1-cyclohexen-1-yl]methyl ester 2-Fur	CC(=CCCC(C)(O)C1CCC(=CC1)COC(=O)c2occc2)C	C20H28O4	332.434	KNApSAcK
(rel)-1beta,2alpha-di-(2,4-dihydroxy-6-methoxybenzoyl)-3beta,4alpha-di-(4-methox	COc1ccc(cc1)C2C(C(C2c3ccc(OC)cc3)C(=O)c4c(O)cc(O)cc4OC)C(=O)c5c(O)cc(O)cc5OC	C34H32O10	600.612	KNApSAcK
(s)-(+)-Abscisic acid 2,4-Pentadienoic acid	C\C(=C\C(=O)O)\C=C\C1(O)C(=CC(=O)CC1(C)C)C	C15H20O4	264.317	KNApSAcK
(S)-(+)-Antidesmone Antidesmone Hyeronine A	CCCCCCCCC1CCC(=O)C2=C1C(=O)C(=C(C)N2)OC	C19H29NO3	319.438	KNApSAcK
(S)-(+)-Chelonin B Chelonine B	COc1ccc(cc1Br)C(O)CNCCc2c[nH]c3ccccc23	C19H21BrN2O2	389.286	KNApSAcK
(S)-(+)-Elvirol	CC(CCC=C(C)C)c1cc(C)ccc1O	C15H22O	218.335	KNApSAcK
(S)-(-)-Oxypeucedanin	CC1(C)OC1COc2c3C=CC(=O)Oc3cc4occc24	C16H14O5	286.279	KNApSAcK
(S)-(-)-Phellandral	CC(C)C1CCC(=CC1)C=O	C10H16O	152.233	KNApSAcK
(S)-1,4-Dihydro-b,5-dihydroxy-3-methyl-1,4-dioxo-2-naphthalenebutanoic acid Jugl	CC1=C(CC(O)CC(=O)O)C(=O)c2cccc(O)c2C1=O	C15H14O6	290.268	KNApSAcK
(S)-1-[4-[(Aminocarbonyl)imino]-3,4-dihydro-3-methyl-2-oxo-1(2H)-pyrimidinyl]-6-	CN1\C(=N\C(=O)N)\C=CN(C2SC(C(O)C(NC(=O)C(N)CO)C(=O)O)C(O)C2O)C1=O	C16H24N6O9S	476.462	KNApSAcK
(S)-10-Gingerol (+)-(S)-[10]-Gingerol	CCCCCCCCCC(O)CC(=O)CCc1ccc(O)c(OC)c1	C21H34O4	350.492	KNApSAcK
(S)-2,2,3-Trimethyl-3-(4-methylphenyl)cyclopentanone Cyclopentanone, 2,2,3-trime	Cc1ccc(cc1)C2(C)CCC(=O)C2(C)C	C15H20O	216.319	KNApSAcK
(S)-2,5-Dihydroxy-3-methyl-6-(1,2,2-trimethylcyclopentyl)-2,5-cyclohexadiene-1,4	CC1=C(O)C(=O)C(=C(O)C1=O)C2(C)CCCC2(C)C	C15H20O4	264.317	KNApSAcK
(S)-3'-Hydroxy-4,4'-dimethoxydalbergione	COC1=CC(=O)C(=CC1=O)C(C=C)c2ccc(OC)c(O)c2	C17H16O5	300.306	KNApSAcK
(S)-3'-Hydroxyepiglucoisatisin 3'-Hydroxyepiglucoisatisin	OCC1OC(S\C(=N\OS(=O)(=O)O)\CC(OC(=O)CC2(O)C(=O)Nc3ccccc23)C=C)C(O)C(O)C1O	C21H26N2O13S2	578.567	KNApSAcK
(S)-4'-Hydroxy-4-methoxydalbergione	COC1=CC(=O)C(=CC1=O)C(C=C)c2ccc(O)cc2	C16H14O4	270.28	KNApSAcK
(S)-4,4'-Dimethoxydalbergione	COC1=CC(=O)C(=CC1=O)C(C=C)c2ccc(OC)cc2	C17H16O4	284.307	KNApSAcK
(S)-4-Hydroxy-3-(1,2,2-trimethylcyclopentyl)benzaldehyde (-)-alpha-Formylherbert	CC1(C)CCCC1(C)c2cc(C=O)ccc2O	C15H20O2	232.318	KNApSAcK
(S)-4-Methyl-2-(1,2,2-trimethylcyclopentyl)-1,3-benzenediol 1-acetate HM3	CC(=O)Oc1ccc(C)c(O)c1C2(C)CCCC2(C)C	C17H24O3	276.371	KNApSAcK
(S)-4-Methyl-6-(1,2,2-trimethylcyclopentyl)-1,3-benzenediol 1-acetate HM2	CC(=O)Oc1cc(O)c(C)cc1C2(C)CCCC2(C)C	C17H24O3	276.371	KNApSAcK
(S)-5,3'-Dihydroxy-2,4-dimethoxydalbergiquinol	COc1cc(OC)c(cc1O)C(C=C)c2cccc(O)c2	C17H18O4	286.322	KNApSAcK
(S)-6-Gingerol (S)-(+)-[6]Gingerol [6]-Gingerol	CCCCCC(O)CC(=O)CCc1ccc(O)c(OC)c1	C17H26O4	294.386	KNApSAcK
(S)-6-Hydroxy-3-methyl-6-(1-methylethyl)-2-cyclohexen-1-one	CC(C)C1(O)CCC(=CC1=O)C	C10H16O2	168.233	KNApSAcK
(S)-8-Gingerol (+)-[8]-Gingerol [8]-Gingerol	CCCCCCCC(O)CC(=O)CCc1ccc(O)c(OC)c1	C19H30O4	322.439	KNApSAcK
(S)-Furanopetasitin	CS\C=C/C(=O)OC1CCC2Cc3occ(C)c3C(OC(=O)\C(=C/C)\C)C2(C)C1C	C24H32O5S	432.573	KNApSAcK
(S)-Hamacanthin A (+)-Hamacanthin A	Brc1ccc2c(c[nH]c2c1)C3CN=C(C(=O)N3)c4c[nH]c5cc(Br)ccc45	C20H14Br2N4O	486.159	KNApSAcK
(S)-Hamacanthin B (+)-(S)-Hamacanthin B Hamacanthin B (S)-(+)-Hamacanthin B	Brc1ccc2c(c[nH]c2c1)C3CNC(=O)C(=N3)c4c[nH]c5cc(Br)ccc45	C20H14Br2N4O	486.159	KNApSAcK
(S)-Isoboldine Isoboldine	COc1cc2c(CC3N(C)CCc4cc(OC)c(O)c2c34)cc1O	C19H21NO4	327.374	KNApSAcK
(S)-N-(1-Hydroxymethyl-2-phenylethyl)-benzamide (-)-N-[(1S)-1-(Hydroxymethyl)-2-	OCC(Cc1ccccc1)NC(=O)c2ccccc2	C16H17NO2	255.312	KNApSAcK
(S)-Tetraphyllin A	OCC1OC(OC2(CCC=C2)C#N)C(O)C(O)C1O	C12H17NO6	271.266	KNApSAcK
(Z)-1-Methyl-2-(pentadec-9-enyl)quinolin-4-one	CCCCC\C=C/CCCCCCCCC1=CC(=O)c2ccccc2N1C	C25H37NO	367.567	KNApSAcK
(Z)-1-Methyl-2-(tridec-7-enyl)quinolin-4-one	CCCCC\C=C/CCCCCCC1=CC(=O)c2ccccc2N1C	C23H33NO	339.514	KNApSAcK
(Z)-1-Methyl-2-(undec-5-enyl)quinolin-4-one	CCCCC\C=C/CCCCC1=CC(=O)c2ccccc2N1C	C21H29NO	311.461	KNApSAcK
(Z)-1beta-hydroxy-2-hydrolanceol	C\C(=C\CCC(=C)C1CCC(C)(O)CC1)\CO	C15H26O2	238.366	KNApSAcK
(Z)-3-Bromohymenialdisine	NC1=NC(=O)\C(=C/2\CCNC(=O)c3[nH]c(Br)c(Br)c23)\N1	C11H9Br2N5O2	403.029	KNApSAcK
(Z)-3-Hexen-1-yl benzoate	CC\C=C/CCOC(=O)c1ccccc1	C13H16O2	204.265	KNApSAcK
(Z)-3-Hexenyl beta-D-glucopyranoside (Z)-3-Hexen-1-ol-beta-D-glucopyranoside (-)	CC\C=C/CCOC1OC(CO)C(O)C(O)C1O	C12H22O6	262.299	KNApSAcK
(Z)-4-Coumaric acid 4-O-beta-D-glucopyranoside (-)-(Z)-p-Coumaric acid 4-O-beta-	OCC1OC(Oc2ccc(\C=C/C(=O)O)cc2)C(O)C(O)C1O	C15H18O8	326.299	KNApSAcK
(Z)-4-Hydroxy-cinnamyl alcohol 4-O-beta-D-glucopyranoside	OC\C=C/c1ccc(OC2OC(CO)C(O)C(O)C2O)cc1	C15H20O7	312.315	KNApSAcK
(Z)-5-(trideca-4-enyl)resorcinol	CCCCCCCC\C=C/CCCc1cc(O)cc(O)c1	C19H30O2	290.44	KNApSAcK
(Z)-alpha-trans-Bergamotol acetate trans-.alpha-Bergamotyl acetate	CC(=O)OC\C(=C/CCC1(C)C2CC=C(C)C1C2)\C	C17H26O2	262.387	KNApSAcK
(Z)-alpha-trans-Bergamotol	C\C(=C\CCC1(C)C2CC=C(C)C1C2)\CO	C15H24O	220.35	KNApSAcK
(Z)-Axinohydantoin	Brc1cc2\C(=C\3/NC(=O)NC3=O)\CCNC(=O)c2[nH]1	C11H9BrN4O3	325.118	KNApSAcK
(Z)-beta-Terpineol cis-beta-Terpineol	CC(=C)C1CCC(C)(O)CC1	C10H18O	154.249	KNApSAcK
(Z)-Campherene-2beta,13-diol (-)-(Z)-Campherene-2beta,13-diol	C\C(=C\CCC1(C)C2CCC1(C)C(O)C2)\CO	C15H26O2	238.366	KNApSAcK
(Z)-gamma-Bisabolene	CC(=CCC\C(=C/1\CCC(=CC1)C)\C)C	C15H24	204.351	KNApSAcK
(Z)-Hymenialdisine	NC1=NC(=O)\C(=C\2/CCNC(=O)c3[nH]c(Br)cc23)\N1	C11H10BrN5O2	324.133	KNApSAcK
(Z)-Senegin II (-)-(Z)-Senegin II	COc1ccc(\C=C/C(=O)OC2C(C)OC(OC(=O)C34CCC(C)(C)CC3C5=CCC6C7(C)CC(O)C(OC8OC(CO)C(O)C(O)C8O)C(C)(C7CCC6(C)C5(CO)CC4)C(=O)O)C(OC9OC(C)C(OC%10OCC(OC%11OC(CO)C(O)C(O)C%11O)C(O)C%10O)C(O)C9O)C2O)cc1OC	C70H104O32	1457.56	KNApSAcK
(Z)-Suberenol	COc1cc2OC(=O)C=Cc2cc1\C=C/C(C)(C)O	C15H16O4	260.285	KNApSAcK
(Z,Z)-1-Methyl-3,6-bis(phenylmethylene)-2,5-piperazinedione Piperafizine A	CN1C(=O)\C(=C\c2ccccc2)\NC(=O)/C/1=C/c3ccccc3	C19H16N2O2	304.343	KNApSAcK
(Z,Z)-Heliangin Leptocarpin	C\C=C(\C)/C(=O)OC1CC2(C)OC2CC(O)\C(=C/C3OC(=O)C(=C)C13)\C	C20H26O6	362.417	KNApSAcK
([3aR-[3aalpha,4aalpha,5(Z),8abeta,9aalpha]]-2,3,3a,4,4a,7,8,8a,9,9a-Decahydro-8	CC12CCC=C(COC(=O)\C=C/c3ccccc3)C1CC4C(C2)OC(=O)C4=C	C24H26O4	378.461	KNApSAcK
,[1aR-[1aalpha,3alpha(Z),4beta,4abeta,5beta,9alphaS]]-1a,2,4,4a,5,9-Hexahydro-5-	C\C=C(\C)/C(=O)OC1CC2OC23Cc4occ(C)c4C(O)C3(C)C1C	C20H26O5	346.417	KNApSAcK
0089A Brasiliquinone A	CCC1CC(=O)c2c(C1)cc(O)c3C(=O)c4c(OC5CC(N)C(O)C(C)O5)cccc4C(=O)c23	C26H27NO7	465.495	KNApSAcK
0089B Brasiliquinone B	CCC1CC(=O)c2c(C1)cc(O)c3C(=O)c4c(O)cccc4C(=O)c23	C20H16O5	336.338	KNApSAcK
0089C Brasiliquinone C	CCC1CC(=O)c2c(C1)cc(O)c3C(=O)c4c(OC)cccc4C(=O)c23	C21H18O5	350.365	KNApSAcK
02-3D	COC(C1Cc2cc3cc(OC4CC(OC5CC(O)C(OC)C(C)O5)C(O)C(C)O4)c(C)c(O)c3c(O)c2C(=O)C1OC6CC(OC7CC(OC8CC(C)(O)C(OC(=O)C)C(C)O8)C(O)C(C)O7)C(O)C(C)O6)C(=O)C(O)C(C)O	C55H80O25	1141.21	KNApSAcK
02-3G	COC(C1Cc2cc3cc(OC4CC(OC5CC(O)C(OC)C(C)O5)C(O)C(C)O4)c(C)c(O)c3c(O)c2C(=O)C1OC6CC(OC7CC(OC8CC(C)(O)C(O)C(C)O8)C(O)C(C)O7)C(O)C(C)O6)C(=O)C(O)C(C)O	C53H78O24	1099.17	KNApSAcK
0231A Indole alkaloid 0231A	COc1cccc2c3c4C(=O)C=Cc5cc(C)cc(c45)n3C(OC)(OC)c12	C22H19NO4	361.391	KNApSAcK
0231B Indole alkaloid 0231B	COC1c2c(OC)cccc2c3c4C(=O)C=Cc5cc(C)cc(c45)n13	C21H17NO3	331.365	KNApSAcK
0406A Brasilinolide A	CCCCC(=O)OC1CC(OC(C)C(C)C(O)C(C)C(O)C(C)C2OC(=O)\C=C\CC(O)CC(O)CC(O)CCC(C)C(O)CC3(O)OC(CC(O)CC(CCCC(O)C4OC4C2C)OC(=O)CC(=O)O)CC(O)C3O)OC(C)C1O	C57H98O24	1167.37	KNApSAcK
0406TP1 Brasilicardin A	COC(CC1C(=CCC2C1(C)CCC3C(C)(C)C(O)C(CC23C)OC4OC(C)C(OC(=O)c5cccc(O)c5)C(OC6OC(CO)C(O)C(O)C6NC(=O)C)C4O)C)C(N)C(=O)O	C45H68N2O16	893.025	KNApSAcK
0466HK1 Brasilinolide B	CCCCC(C(=O)OC)C(=O)OC1CCCC(O)C2OC2C(C)C(OC(=O)\C=C\CC(O)CC(O)CC(O)CCC(C)C(O)CC3(O)OC(CC(O)C1)CC(O)C3O)C(C)C(O)C(C)C(O)C(C)C(C)OC4CC(OC)C(OC)C(C)O4	C59H104O23	1181.44	KNApSAcK
0624A Nocardicyclin A	COC1C(OC2CC(C)(C(O)C(C)O2)N(C)C)c3c(O)c4C(=O)c5c(O)ccc(OC)c5C(=O)c4cc3C(=O)C1(C)O	C30H35NO11	585.599	KNApSAcK
0624B Nocardicyclin B	COC1C(OC2CC(C)(C(OC(=O)C)C(C)O2)N(C)C)c3c(O)c4C(=O)c5c(O)ccc(OC)c5C(=O)c4cc3C(=O)C1(C)O	C32H37NO12	627.636	KNApSAcK
1'''-Hydroxy-2''',3'''-Epoxylupinifolin 5,4-Dihydroxy-8-(1-hydroxy-2,3-epoxy-3-m	CC1(C)Oc2c(C=C1)c(O)c3C(=O)CC(Oc3c2C(O)C4OC4(C)C)c5ccc(O)cc5	C25H26O7	438.47	KNApSAcK
1'''-O-beta-Glucosylfraxiformoside	C\C=C/1\C(OC2OC(CO)C(O)C(O)C2O)OC=C(C1CC(=O)Oc3ccc(CCOC4OC(CO)C(O)C(O)C4O)cc3)C(=O)OCCc5ccc(O)cc5	C38H48O18	792.777	KNApSAcK
1'',2''-Dihydro-2'-hydroxycycloosajin	COc1ccc(C2=COc3c4CCC(C)(C)Oc4c5CCC(C)(C)Oc5c3C2=O)c(O)c1	C26H28O6	436.497	KNApSAcK
1'',2''-Dihydro-8-hydroxyisopentanyl-2'-methoxy-4'-O-methylalpinumisoflavone	COc1ccc(C2=COc3c(CCC(C)(C)O)c4OC(C)(C)CCc4c(O)c3C2=O)c(OC)c1	C27H32O7	468.539	KNApSAcK
1'',2''-Dihydro-8-hydroxyisopentanyl-3'-methoxy-4'-O-methylalpinumisoflavone	COc1ccc(cc1OC)C2=COc3c(CCC(C)(C)O)c4OC(C)(C)CCc4c(O)c3C2=O	C27H32O7	468.539	KNApSAcK
1'',2''-Dihydro-O-methylcyclopomiferin	COc1cc(ccc1O)C2=COc3c4CCC(C)(C)Oc4c5CCC(C)(C)Oc5c3C2=O	C26H28O6	436.497	KNApSAcK
1',2',3',4'-Tetradehydrotubulosine	CCC1CN2CCc3cc(OC)c(OC)cc3C2CC1Cc4nccc5c6cc(O)ccc6[nH]c45	C29H33N3O3	471.591	KNApSAcK
1',2',6',7',8'-Epicyclolycoserone	CC(C)CC(=O)C12OC(C3C(C)CCC3C1C)C4=C(O2)c5c(C)cccc5OC4=O	C25H30O5	410.503	KNApSAcK
1',2'-Didehydrostemofoline N-oxide	CC\C=C\C12C3CC4C5C(C)\C(=C/6\OC(=O)C(=C6OC)C)\OC5(O3)C1CCN24=O	C22H27NO6	401.453	KNApSAcK
1',2'-Dihydro-1'-hydroxy-beta,psi-caroten-4-one	C\C(=C/C=C/C(=C/C=C/C(=C/C=C/C=C(\C)/C=C/C=C(\C)/C=C/C1=C(C)C(=O)CCC1(C)C)/C)/C)\CCCC(C)(C)O	C40H56O2	568.871	KNApSAcK
1',2'-Dihydro-1'-hydroxy-phi,psi-carotene	C\C(=C/C=C/C(=C/C=C/C(=C/C=C/C=C(\C)/C=C/C=C(\C)/C=C/c1c(C)ccc(C)c1C)/C)/C)\CCCC(C)(C)O	C40H54O	550.856	KNApSAcK
1',2'-Dihydro-gamma-carotene 1',2'-Dihydro-beta,psi-carotene	CC(C)CCC\C(=C\C=C\C(=C\C=C\C(=C\C=C\C=C(/C)\C=C\C=C(/C)\C=C\C1=C(C)CCCC1(C)C)\C)\C)\C	C40H58	538.889	KNApSAcK
1',2'-Dihydrochlorobactene	CC(C)CCC\C(=C\C=C\C(=C\C=C\C(=C\C=C\C=C(/C)\C=C\C=C(/C)\C=C\c1c(C)ccc(C)c1C)\C)\C)\C	C40H54	534.857	KNApSAcK
1',2'-Epoxy-1',2'-dihydro-beta,psi-carotene	C\C(=C/C=C/C(=C/C=C/C(=C/C=C/C=C(\C)/C=C/C=C(\C)/C=C/C1=C(C)CCCC1(C)C)/C)/C)\CCC2OC2(C)C	C40H56O	552.872	KNApSAcK
1',2'-Epoxy-1',2'-dihydro-epsilon,psi-carotene	C\C(=C/C=C/C(=C/C=C/C(=C/C=C/C=C(\C)/C=C/C=C(\C)/C=C/C1C(=CCCC1(C)C)C)/C)/C)\CCC2OC2(C)C	C40H56O	552.872	KNApSAcK
1',2'-Epoxy-3',4'-di-isobutyryl-Z-coniferyl alcohol	COc1cc(ccc1OC(=O)C(C)C)C2OC2COC(=O)C(C)C	C18H24O6	336.38	KNApSAcK
1',8-Dihydroaplysinopsin	CN1C(Cc2c[nH]c3ccccc23)C(=O)N(C)C1=N	C14H16N4O	256.303	KNApSAcK
1'-(beta-D-Glucopyranosyloxy)-1',2'-dihydro-beta,psi-caroten-4-one	C\C(=C/C=C/C(=C/C=C/C(=C/C=C/C=C(\C)/C=C/C=C(\C)/C=C/C1=C(C)C(=O)CCC1(C)C)/C)/C)\CCCC(C)(C)OC2OC(CO)C(O)C(O)C2O	C46H66O7	731.012	KNApSAcK
1'-(beta-D-Glucopyranosyloxy)-1',2'-dihydro-beta,psi-carotene	C\C(=C/C=C/C(=C/C=C/C(=C/C=C/C=C(\C)/C=C/C=C(\C)/C=C/C1=C(C)CCCC1(C)C)/C)/C)\CCCC(C)(C)OC2OC(CO)C(O)C(O)C2O	C46H68O6	717.029	KNApSAcK
1'-Acetoxychavicol acetate	CC(=O)OC(C=C)c1ccc(OC(=O)C)cc1	C13H14O4	234.248	KNApSAcK
1'-Acetoxyeugenol acetate	COc1cc(ccc1OC(=O)C)C(OC(=O)C)C=C	C14H16O5	264.274	KNApSAcK
1'-Demethylclindamycin 7-Chloro-N-demethyllincomycin N-Demethylclindamycin U 267	CCCC1CNC(C1)C(=O)NC(C(C)Cl)C2OC(SC)C(O)C(O)C2O	C17H31ClN2O5S	410.956	KNApSAcK
1'-epi-Sauchinone	CC1CC2C3C(C1C)c4cc5OCOc5cc4OC36OCOC6=CC2=O	C20H20O6	356.369	KNApSAcK
1'-Hydroxy-1',2'-dihydro-gamma-carotene 1',2'-Dihydro-beta,psi-caroten-1'-ol	C\C(=C/C=C/C(=C/C=C/C(=C/C=C/C=C(\C)/C=C/C=C(\C)/C=C/C1=C(C)CCCC1(C)C)/C)/C)\CCCC(C)(C)O	C40H58O	554.888	KNApSAcK
1'-Isovaleroyloxy-4-O-isobutyryleugenol (-)-1'-Isovaleroyloxy-4-O-isobutyryleuge	COc1cc(ccc1OC(=O)C(C)C)C(OC(=O)CC(C)C)C=C	C19H26O5	334.407	KNApSAcK
1'-O-Bacchabolivyl xylopyranoside	CC1=CCCC2C(C)(CCc3cocc3)C(CCC12C)C(=O)OC4OCC(O)C(O)C4O	C25H36O7	448.549	KNApSAcK
1(10),13E-Halimadiene-15,18-dioic acid	CC1CCC2C(=CCCC2(C)C(=O)O)C1(C)CC\C(=C\C(=O)O)\C	C20H30O4	334.45	KNApSAcK
[truncated: 156,921 more rows]
