# Supplementary material for: Development of Natural Compound Molecular Fingerprint (NC-MFP) with the Dictionary of Natural Products (DNP) for natural product-based drug development
Source: J Cheminform. 2020 Jan 22;12:6. doi: 10.1186/s13321-020-0410-3 (PMC6977316; doi:10.1186/s13321-020-0410-3)
Supplement: Supplementary file 9 — Additional file 9. External validation results of the binary classification task I. [file 13321_2020_410_MOESM9_ESM.xlsx]

## Sheet: Total_results_table
	Performance of each molecular fingerprint obtained by averaging ten external validation tasks
	Molecular fingerprints	Natural compound classification			Synthetic compound classification
		Avg. TP	Avg. FN	Avg. Senstivity	Avg. TN	Avg. FP	Avg. Specificity
	NC-MFP	183	14	0.9265	113	87	0.565
	MACCS	169	30	0.846	146	53	0.7335
	PubChemFP	165	34	0.826	154	46	0.77
	GraphFP	161	38	0.8075	143	56	0.718
	APFP	153	46	0.7655	141	58	0.707
	ECFP6	169	30	0.8465	159	40	0.798

## Sheet: Results of the task1
	External validation set		NC-MFP					MACCS					PubchemFP					GraphFP					APFP					ECFP6
	1			true NC	true SC	class precision			true NC	true SC	class precision			true NC	true SC	class precision			true NC	true SC	class precision			true NC	true SC	class precision			true NC	true SC	class precision
			pred. NC	187	91	0.6727		pred. NC	167	56	0.7489		pred. NC	165	47	0.7783		pred. NC	163	52	0.7581		pred. NC	151	57	0.726		pred. NC	170	38	0.8173
			pred. SC	13	109	0.8934		pred. SC	33	144	0.8136		pred. SC	35	153	0.8138		pred. SC	37	148	0.8		pred. SC	49	143	0.7448		pred. SC	30	162	0.8438
			class recall	0.935	0.545			class recall	0.835	0.72			class recall	0.825	0.765			class recall	0.815	0.74			class recall	0.755	0.715			class recall	0.85	0.81
	External validation set		NC-MFP					MACCS					PubchemFP					GraphFP					APFP					ECFP6
	2			true NC	true SC	class precision			true NC	true SC	class precision			true NC	true SC	class precision			true NC	true SC	class precision			true NC	true SC	class precision			true NC	true SC	class precision
			pred. NC	183	84	s		pred. NC	171	53	0.7634		pred. NC	162	48	0.7714		pred. NC	161	52	0.7559		pred. NC	151	60	0.7156		pred. NC	169	42	0.8009
			pred. SC	17	116	0.8722		pred. SC	29	147	0.8352		pred. SC	38	152	0.8		pred. SC	39	148	0.7914		pred. SC	49	140	0.7407		pred. SC	31	158	0.836
			class recall	0.915	0.58			class recall	0.855	0.735			class recall	0.81	0.76			class recall	0.805	0.74			class recall	0.755	0.7			class recall	0.845	0.79
	External validation set		NC-MFP					MACCS					PubchemFP					GraphFP					APFP					ECFP6
	3			true NC	true SC	class precision			true NC	true SC	class precision			true NC	true SC	class precision			true NC	true SC	class precision			true NC	true SC	class precision			true NC	true SC	class precision
			pred. NC	183	84	0.6854		pred. NC	169	53	0.7613		pred. NC	163	41	0.799		pred. NC	160	53	0.7512		pred. NC	158	58	0.7315		pred. NC	167	41	0.8029
			pred. SC	17	116	0.8722		pred. SC	31	147	0.8258		pred. SC	37	159	0.8112		pred. SC	40	147	0.7861		pred. SC	42	142	0.7717		pred. SC	33	159	0.8281
			class recall	0.915	0.58			class recall	0.845	0.735			class recall	0.815	0.795			class recall	0.8	0.735			class recall	0.79	0.71			class recall	0.835	0.795
	External validation set		NC-MFP					MACCS					PubchemFP					GraphFP					APFP					ECFP6
	4			true NC	true SC	class precision			true NC	true SC	class precision			true NC	true SC	class precision			true NC	true SC	class precision			true NC	true SC	class precision			true NC	true SC	class precision
			pred. NC	181	86	0.6779		pred. NC	171	51	0.7703		pred. NC	165	43	0.7933		pred. NC	152	50	0.7525		pred. NC	152	60	0.717		pred. NC	167	38	0.8146
			pred. SC	19	114	0.8571		pred. SC	29	149	0.8371		pred. SC	35	157	0.8177		pred. SC	48	150	0.7576		pred. SC	48	140	0.7447		pred. SC	33	162	0.8308
			class recall	0.905	0.57			class recall	0.855	0.745			class recall	0.825	0.785			class recall	0.76	0.75			class recall	0.76	0.7			class recall	0.835	0.81
	External validation set		NC-MFP					MACCS					PubchemFP					GraphFP					APFP					ECFP6
	5			true NC	true SC	class precision			true NC	true SC	class precision			true NC	true SC	class precision			true NC	true SC	class precision			true NC	true SC	class precision			true NC	true SC	class precision
			pred. NC	181	81	0.6908		pred. NC	163	49	0.7689		pred. NC	163	49	0.7689		pred. NC	159	68	0.7004		pred. NC	157	57	0.7336		pred. NC	170	45	0.7907
			pred. SC	19	119	0.8623		pred. SC	37	151	0.8032		pred. SC	37	151	0.8032		pred. SC	41	132	0.763		pred. SC	43	143	0.7688		pred. SC	30	155	0.8378
			class recall	0.905	0.595			class recall	0.815	0.755			class recall	0.815	0.755			class recall	0.795	0.66			class recall	0.785	0.715			class recall	0.85	0.775
	External validation set		NC-MFP					MACCS					PubchemFP					GraphFP					APFP					ECFP6
	6			true NC	true SC	class precision			true NC	true SC	class precision			true NC	true SC	class precision			true NC	true SC	class precision			true NC	true SC	class precision			true NC	true SC	class precision
			pred. NC	186	89	0.6764		pred. NC	175	56	0.7576		pred. NC	164	49	0.77		pred. NC	164	55	0.7489		pred. NC	151	57	0.726		pred. NC	170	38	0.8173
			pred. SC	14	111	0.888		pred. SC	25	144	0.8521		pred. SC	36	151	0.8075		pred. SC	36	145	0.8011		pred. SC	49	143	0.7448		pred. SC	30	162	0.8438
			class recall	0.93	0.555			class recall	0.875	0.72			class recall	0.82	0.755			class recall	0.82	0.725			class recall	0.755	0.715			class recall	0.85	0.81
	External validation set		NC-MFP					MACCS					PubchemFP					GraphFP					APFP					ECFP6
	7			true NC	true SC	class precision			true NC	true SC	class precision			true NC	true SC	class precision			true NC	true SC	class precision			true NC	true SC	class precision			true NC	true SC	class precision
			pred. NC	185	84	0.6877		pred. NC	168	56	0.75		pred. NC	168	46	0.785		pred. NC	169	55	0.7545		pred. NC	155	62	0.7143		pred. NC	167	38	0.8146
			pred. SC	15	116	0.8855		pred. SC	32	144	0.8182		pred. SC	32	154	0.828		pred. SC	31	145	0.8239		pred. SC	45	138	0.7541		pred. SC	33	162	0.8308
			class recall	0.925	0.58			class recall	0.84	0.72			class recall	0.84	0.77			class recall	0.845	0.725			class recall	0.775	0.69			class recall	0.835	0.81
	External validation set		NC-MFP					MACCS					PubchemFP					GraphFP					APFP					ECFP6
	8			true NC	true SC	class precision			true NC	true SC	class precision			true NC	true SC	class precision			true NC	true SC	class precision			true NC	true SC	class precision			true NC	true SC	class precision
			pred. NC	191	89	0.6821		pred. NC	169	55	0.7545		pred. NC	165	43	0.7933		pred. NC	159	53	0.75		pred. NC	144	54	0.7273		pred. NC	170	36	0.8252
			pred. SC	9	111	0.925		pred. SC	31	145	0.8239		pred. SC	35	157	0.8177		pred. SC	41	147	0.7819		pred. SC	56	146	0.7228		pred. SC	30	164	0.8454
			class recall	0.955	0.555			class recall	0.845	0.725			class recall	0.825	0.785			class recall	0.795	0.735			class recall	0.72	0.73			class recall	0.85	0.82
	External validation set		NC-MFP					MACCS					PubchemFP					GraphFP					APFP					ECFP6
	9			true NC	true SC	class precision			true NC	true SC	class precision			true NC	true SC	class precision			true NC	true SC	class precision			true NC	true SC	class precision			true NC	true SC	class precision
			pred. NC	191	90	0.6797		pred. NC	172	55	0.7577		pred. NC	174	45	0.7945		pred. NC	168	55	0.7534		pred. NC	161	60	0.7285		pred. NC	175	42	0.8065
			pred. SC	9	110	0.9244		pred. SC	28	145	0.8382		pred. SC	26	155	0.8564		pred. SC	32	145	0.8192		pred. SC	39	140	0.7821		pred. SC	25	158	0.8634
			class recall	0.955	0.55			class recall	0.86	0.725			class recall	0.87	0.775			class recall	0.84	0.725			class recall	0.805	0.7			class recall	0.875	0.79
	External validation set		NC-MFP					MACCS					PubchemFP					GraphFP					APFP					ECFP6
	10			true NC	true SC	class precision			true NC	true SC	class precision			true NC	true SC	class precision			true NC	true SC	class precision			true NC	true SC	class precision			true NC	true SC	class precision
			pred. NC	185	92	0.6679		pred. NC	167	49	0.7731		pred. NC	163	49	0.7689		pred. NC	160	71	0.6926		pred. NC	151	61	0.7123		pred. NC	168	46	0.785
			pred. SC	15	108	0.878		pred. SC	33	151	0.8207		pred. SC	37	151	0.8032		pred. SC	40	129	0.7633		pred. SC	49	139	0.7394		pred. SC	32	154	0.828
			class recall	0.925	0.54			class recall	0.835	0.755			class recall	0.815	0.755			class recall	0.8	0.645			class recall	0.755	0.695			class recall	0.84	0.77
	Average		NC-MFP					MACCS					PubchemFP					GraphFP					APFP					ECFP6
			NC-MFP	true NC	true SC	class precision		MACCS	true NC	true SC	class precision		PubchemFP	true NC	true SC	class precision			true NC	true SC	class precision			true NC	true SC	class precision			true NC	true SC	class precision
			pred. NC	185.3	87	0.680067		pred. NC	169.2	53.3	0.76057		pred. NC	165.2	46	0.78226		pred. NC	161.5	56.4	0.74175		pred. NC	153.1	58.6	0.72321		pred. NC	169.3	40.4	0.8075
			pred. SC	14.7	113	0.88581		pred. SC	30.8	146.7	0.8268		pred. SC	34.8	154	0.81587		pred. SC	38.5	143.6	0.78875		pred. SC	46.9	141.4	0.75139		pred. SC	30.7	159.6	0.83879
			class recall	0.9265	0.565			class recall	0.846	0.7335			class recall	0.826	0.77			class recall	0.8075	0.718			class recall	0.7655	0.707			class recall	0.8465	0.798
			recall * 100	92.65	56.5			recall * 100	84.6	73.35			recall * 100	82.6	77			recall * 100	80.75	71.8			recall * 100	76.55	70.7			recall * 100	84.65	79.8
