# Supplementary material for: Development of Natural Compound Molecular Fingerprint (NC-MFP) with the Dictionary of Natural Products (DNP) for natural product-based drug development
Source: J Cheminform. 2020 Jan 22;12:6. doi: 10.1186/s13321-020-0410-3 (PMC6977316; doi:10.1186/s13321-020-0410-3)
Supplement: Supplementary file 11 — Additional file 11. External validation results of the binary classification task II. [file 13321_2020_410_MOESM11_ESM.xlsx]

## Sheet: Result
	The result Y-randomization in task Ⅰ (by internal validation data)
	No.	Molecular fingerprints	Z-score (ACC)	Z-score (MCC)	Evaluation (Z-score > 3)	The absence of chance correlation in the classification model
	1	NC-MFP	19.785	17.095	TRUE	TRUE
	2	MACCS	12.588	12.611	TRUE	TRUE
	3	PubChemFP	31.723	31.799	TRUE	TRUE
	4	GraphFP	15.932	16.007	TRUE	TRUE
	5	APFP	15.976	15.911	TRUE	TRUE

## Sheet: Y-randomization in task 1
	Internal validation (10-fold cross-validation)		NC-MFP					MACCS					PubChemFP					GraphFP					APFP
	Origin data model			true NC	true SC	class precision			true NC	true SC	class precision			true NC	true SC	class precision			true NC	true SC	class precision			true NC	true SC	class precision
			pred. NC	713	445	0.6157		pred. NC	662	189	0.7779		pred. NC	660	198	0.7692		pred. NC	645	234	0.7338		pred. NC	578	258	0.6914
			pred. SC	87	355	0.8032		pred. SC	138	611	0.8158		pred. SC	140	602	0.8113		pred. SC	155	566	0.785		pred. SC	222	542	0.7094
			class recall	0.8912	0.4438			class recall	0.8275	0.7638			class recall	0.825	0.7525			class recall	0.8062	0.7075			class recall	0.7225	0.6775
			ACC	0.6675	MCC	0.374601		ACC	0.795625	MCC	0.592455		ACC	0.78875	MCC	0.579024		ACC	0.756875	MCC	0.516273		ACC	0.7	MCC	0.400406
	Internal validation (10-fold cross-validation)		NC-MFP					MACCS					PubChemFP					GraphFP					APFP
	reshuffled data model 1			true NC	true SC	class precision			true NC	true SC	class precision			true NC	true SC	class precision			true NC	true SC	class precision			true NC	true SC	class precision
			pred. NC	632	649	0.4934		pred. NC	386	413	0.4831		pred. NC	395	380	0.5097		pred. NC	399	414	0.4908		pred. NC	442	437	0.5028
			pred. SC	168	151	0.4734		pred. SC	414	387	0.4831		pred. SC	405	420	0.5091		pred. SC	401	386	0.4905		pred. SC	358	363	0.5035
			class recall	0.79	0.1888			class recall	0.4825	0.4838			class recall	0.4938	0.525			class recall	0.4988	0.4825			class recall	0.5525	0.4538
			ACC	0.489375	MCC	-0.0265937		ACC	0.483125	MCC	-0.03375		ACC	0.509375	MCC	0.0187592		ACC	0.490625	MCC	-0.0187525		ACC	0.503125	MCC	0.0062807
	Internal validation (10-fold cross-validation)		NC-MFP					MACCS					PubChemFP					GraphFP					APFP
	reshuffled data model 2			true NC	true SC	class precision			true NC	true SC	class precision			true NC	true SC	class precision			true NC	true SC	class precision			true NC	true SC	class precision
			pred. NC	654	674	0.4925		pred. NC	388	427	0.4761		pred. NC	388	414	0.4838		pred. NC	389	391	0.4987		pred. NC	448	435	0.5074
			pred. SC	146	126	0.4632		pred. SC	412	373	0.4752		pred. SC	412	386	0.4837		pred. SC	411	409	0.4988		pred. SC	352	365	0.5091
			class recall	0.8175	0.1575			class recall	0.485	0.4662			class recall	0.485	0.4825			class recall	0.4862	0.5112			class recall	0.56	0.4562
			ACC	0.4875	MCC	-0.0332772		ACC	0.475625	MCC	-0.0487586		ACC	0.48375	MCC	-0.0325001		ACC	0.49875	MCC	-0.00250078		ACC	0.508125	MCC	0.0163382
	Internal validation (10-fold cross-validation)		NC-MFP					MACCS					PubChemFP					GraphFP					APFP
	reshuffled data model 3			true NC	true SC	class precision			true NC	true SC	class precision			true NC	true SC	class precision			true NC	true SC	class precision			true NC	true SC	class precision
			pred. NC	641	672	0.4882		pred. NC	421	362	0.5377		pred. NC	385	394	0.4942		pred. NC	411	372	0.5249		pred. NC	425	454	0.4835
			pred. SC	159	128	0.446		pred. SC	379	438	0.5361		pred. SC	415	406	0.4945		pred. SC	389	428	0.5239		pred. SC	375	346	0.4799
			class recall	0.8012	0.16			class recall	0.5262	0.5475			class recall	0.4812	0.5075			class recall	0.5138	0.535			class recall	0.5312	0.4325
			ACC	0.480625	MCC	-0.0504997		ACC	0.536875	MCC	0.0737667		ACC	0.494375	MCC	-0.0112539		ACC	0.524375	MCC	0.048761		ACC	0.481875	MCC	-0.0364281
	Internal validation (10-fold cross-validation)		NC-MFP					MACCS					PubChemFP					GraphFP					APFP
	reshuffled data model 4			true NC	true SC	class precision			true NC	true SC	class precision			true NC	true SC	class precision			true NC	true SC	class precision			true NC	true SC	class precision
			pred. NC	640	664	0.4908		pred. NC	405	413	0.4951		pred. NC	420	428	0.4953		pred. NC	396	411	0.4907		pred. NC	475	481	0.4969
			pred. SC	160	136	0.4595		pred. SC	395	387	0.4949		pred. SC	380	372	0.4947		pred. SC	404	389	0.4905		pred. SC	325	319	0.4953
			class recall	0.8	0.17			class recall	0.5062	0.4838			class recall	0.525	0.465			class recall	0.495	0.4862			class recall	0.5938	0.3988
			ACC	0.485	MCC	-0.0386302		ACC	0.495	MCC	-0.0100025		ACC	0.495	MCC	-0.010018		ACC	0.490625	MCC	-0.0187507		ACC	0.49625	MCC	-0.00764679
	Internal validation (10-fold cross-validation)		NC-MFP					MACCS					PubChemFP					GraphFP					APFP
	reshuffled data model 5			true NC	true SC	class precision			true NC	true SC	class precision			true NC	true SC	class precision			true NC	true SC	class precision			true NC	true SC	class precision
			pred. NC	665	658	0.5026		pred. NC	400	404	0.4975		pred. NC	395	408	0.4919		pred. NC	392	421	0.4822		pred. NC	448	425	0.5132
			pred. SC	135	142	0.5126		pred. SC	400	396	0.4975		pred. SC	405	392	0.4918		pred. SC	408	379	0.4816		pred. SC	352	375	0.5158
			class recall	0.8312	0.1775			class recall	0.5	0.495			class recall	0.4938	0.49			class recall	0.49	0.4738			class recall	0.56	0.4688
			ACC	0.504375	MCC	0.0115632		ACC	0.4975	MCC	-0.00500006		ACC	0.491875	MCC	-0.0162501		ACC	0.481875	MCC	-0.0362548		ACC	0.514375	MCC	0.0288704
	Z-score		NC-MFP					MACCS					PubChemFP					GraphFP					APFP
			Z-score (ACC)	19.785	Z-score (MCC)	17.0947		Z-score (ACC)	12.588	Z-score (MCC)	12.611		Z-score (ACC)	31.7225	Z-score (MCC)	31.7987		Z-score (ACC)	15.9322	Z-score (MCC)	16.0067		Z-score (ACC)	15.976	Z-score (MCC)	15.9113
